# Supplementary material
Source: PubMed Central journal article supplement (PMC3985522)

## *Supporting Information*

### *General Reagent Information*

All reactions were carried out under an argon atmosphere. THF was purchased from J.T. Baker in CYCLE-TAINER® solvent delivery kegs and vigorously purged with argon for 2 h. The solvent was further purified by passing it under argon pressure through two packed columns of neutral alumina and copper (II) oxide. Aryl halides were purchased from Aldrich Chemical Co., Alfa Aesar, Acros Organics, TCI America, Frontier Scientific or Combi Blocks and were used as received without further purification. Vinyl triflates and nonaflates were prepared using literature procedures.<sup>1</sup> Ligands **L1-L4** were purchased from Strem Chemicals. Ligand **L5** was synthesized according to literature procedure<sup>2</sup> and is commercially available from Sigma-Aldrich. Precatalysts **5** were synthesized using literature procedures.<sup>3</sup> Pd-PEPSI-IPent (**6**) was purchased from Sigma-Aldrich. Flash chromatography was performed using a Biotage Isolera instrument with prepacked silica cartridges.

### *General Analytical Information*

All compounds were characterized by <sup>1</sup>H NMR, <sup>13</sup>C NMR and <sup>19</sup>F NMR (where applicable). New compounds were characterized by IR spectroscopy, melting point (where applicable) and elemental analysis or high-resolution mass spectroscopy. Copies of the <sup>1</sup>H and <sup>13</sup>C spectra can be found at the end of the Supporting Information. Nuclear Magnetic Resonance spectra were recorded on a Bruker 400 MHz instrument. All <sup>1</sup>H NMR experiments are reported in  $\delta$  units, parts per million (ppm), and were measured relative to the signals for residual chloroform (7.26 ppm) in the deuterated solvent. All <sup>13</sup>C NMR spectra are reported in ppm relative to deuteriochloroform (77.16 ppm) and all were obtained with <sup>1</sup>H decoupling. All <sup>19</sup>F NMR spectra are reported in ppm relative to

---

<sup>1</sup> E. J. Cho, S. L. Buchwald, *Org. Lett.* **2011**, *13*, 6552-6555.

<sup>2</sup> C. Han, S. L. Buchwald, *J. Am. Chem. Soc.* **2009**, *131*, 7532-7533.

<sup>3</sup> N. C. Bruno, M. T. Tudge, S. L. Buchwald, *Chem. Sci.* **2013**, *4*, 916-920.

CFC1<sub>3</sub> (0.00 ppm). All IR spectra were taken on a Thermo Scientific Nicolet iS5 spectrometer (iD5 ATR, diamond). All GC analyses were performed on a Agilent 6890 gas chromatograph with an FID detector using a J & W DB-1 column (10 m, 0.1 mm I.D.). Elemental analyses were performed by Atlantic Microlabs Inc., Norcross, GA. ESI-MS spectra were recorded on a Bruker Daltonics APEXIV 4.7 Tesla Fourier transform ion cyclotron resonance mass spectrometer (FT-ICR-MS).

**Table S1. Ligand Evaluation: Some Representative Unsuccessful Catalysts<sup>a</sup>**

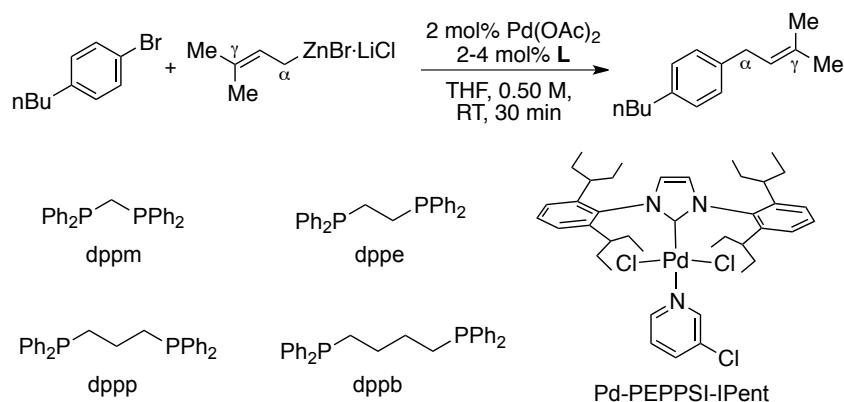

| entry | ligand                        | conv. | yield of Ar-(prenyl) | yield of Ar-H | conv. to Ar-Ar |
|-------|-------------------------------|-------|----------------------|---------------|----------------|
| 1     | PPh <sub>3</sub>              | 0     | 0                    | 0             | 0              |
| 2     | PPh <sub>3</sub> <sup>b</sup> | 100   | 6                    | 3             | 80             |
| 3     | dppm                          | 0     | 0                    | 0             | 0              |
| 4     | dppm <sup>b</sup>             | 32    | 0                    | 25            | 7              |
| 5     | dppe                          | 0     | 0                    | 0             | 0              |
| 6     | dppe <sup>b</sup>             | 100   | 10                   | 5             | 80             |
| 7     | dppp                          | 0     | 0                    | 0             | 0              |
| 8     | dppp <sup>b</sup>             | 100   | 14                   | 10            | 56             |
| 9     | dppb                          | 0     | 0                    | 0             | 0              |
| 10    | dppb <sup>b</sup>             | 100   | 8                    | 15            | 75             |
| 11    | Pd-PEPPSI-IPent <sup>c</sup>  | 1     | 0                    | 0             | 0              |

*a.* 1-Bromo-4-butylbenzene (0.5 mmol), prenylzinc bromide (0.65 mmol), Pd(OAc)<sub>2</sub> (2 mol%) were used. Yields were determined by GC analysis of the crude reaction mixture using dodecane as an internal standard. *b.* Reaction was run at 70 °C for 24 h. *c.* No Pd(OAc)<sub>2</sub> was used.

### ***Preparation of Allylzinc Reagents Using Knochel's Protocol<sup>4</sup>***

<sup>4</sup> A. Krasovskiy, V. Malakhov, A. Gavryushin, P. Knochel, *Angew. Chem., Int. Ed.* **2006**, *45*, 6040-6044.

**Representative Procedure (Preparation of Prenylzinc Bromide):** An oven-dried round-bottom flask equipped with a magnetic stir bar and a rubber septum was charged with LiCl (4.2 g, 100 mmol). The vessel was heated with a heat gun for 10 min under high vacuum and backfilled with argon after cooling to room temperature. Zinc dust (4.88 g, 75 mmol) was added. The vessel was evacuated and backfilled with argon. THF (40 mL) and 1,2-dibromoethane (215  $\mu$ L, 2.5 mmol) were added via syringe and the reaction mixture was heated at 40 °C until bubbling occurred (10 min). Trimethylsilyl chloride (63  $\mu$ L, 0.5 mmol) and a solution of iodine (64 mg, 0.25 mmol) in THF (1 mL) were added via syringe. The reaction mixture was then cooled to 0 °C in an ice bath. 3,3-Dimethylallyl bromide (5.8 mL, 50 mmol) was added dropwise over 1 h using a syringe pump. The reaction mixture was allowed to warm to room temperature and stir for an additional 2 h. After the completion of the reaction, the reaction mixture was allowed to stand at room temperature for 1 h and the supernatant solution was carefully transferred to a dry vessel via cannula. The concentration of the organozinc solution was determined by iodometric titration using Knochel's procedure<sup>5</sup> (0.81 M, ca. 75% yield).

### ***Experimental Procedures for Examples Described in Scheme 3-5***

**General Procedure:** An oven-dried screw-cap test tube, which was equipped with a magnetic stir bar and fitted with a teflon septum, was charged with CPhos Precat (16.2 mg, 0.02 mmol) and CPhos (8.7 mg, 0.02 mmol). If the (hetero)aryl halide (1.0 mmol) was a solid, it was also added at this time. The test tube was evacuated and backfilled with argon (this process was repeated a total of 3 times) and THF (0.4 mL) were added via syringe. If the (hetero)aryl halide was a liquid, it was added to the test tube via syringe at this time. A THF solution of prenylzinc bromide (1.30 mmol, 1.60 mL, 0.81 M) was added dropwise via syringe. The reaction mixture was allowed to stir at room temperature for 2-12 h, and then quenched by water (5 mL) and extracted with ethyl acetate (3 $\times$ 10 mL). The combined organic phases were dried over MgSO<sub>4</sub> and concentrated in vacuo, and purified by a Biotage SP4 instrument.

---

<sup>5</sup> A. Krasovskiy, P. Knochel, *Synthesis* **2006**, 890-891.

#### 1-Butyl-4-(3-methylbut-2-en-1-yl)benzene (4)

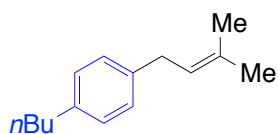

Following the general procedure, a THF solution of prenylzinc bromide (2.30 mmol, 2.87 mL, 0.81 M) and 1-bromo-4-butylbenzene (213 mg, 176  $\mu$ L, 1.0 mmol) were used. The reaction mixture was allowed to stir at room temperature for 2 h. The crude product was purified via Biotage SP4 (silica-packed 25 g SNAP cartridge; 0-2% EtOAc/hexanes) to provide the title compound as a colorless liquid (192 mg, 95%).  $^1\text{H}$  NMR (400 MHz,  $\text{CDCl}_3$ )  $\delta$ : 7.24-7.22 (m, 4H), 5.47 (t,  $J = 7.2$  Hz, 2H), 3.45 (d,  $J = 7.2$  Hz, 2H), 2.71 (t,  $J = 7.8$  Hz, 2H), 1.87 (s, 3H), 1.86 (s, 3H), 1.73 (m, 2H), 1.50 (m, 2H), 1.07 (t,  $J = 7.2$  Hz, 3H), ppm.  $^{13}\text{C}$  NMR (100 MHz,  $\text{CDCl}_3$ )  $\delta$ : 140.3, 139.0, 132.3, 128.5, 128.3, 123.6, 35.4, 34.1, 34.0, 25.9, 22.6, 17.9, 14.1 ppm. Spectral data were in accordance with those in literature.<sup>6</sup> The  $\alpha/\gamma$  ratio was determined to be >99:1 by  $^1\text{H}$  NMR spectroscopy of the crude reaction mixture.

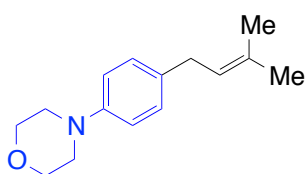

#### 4-(4-(3-Methylbut-2-en-1-yl)phenyl)morpholine (7a)

Following the general procedure, a THF solution of prenylzinc bromide (2.30 mmol, 2.87 mL, 0.81 M) and (4-bromophenyl)morpholine (242 mg, 1.0 mmol) were used. The reaction mixture was allowed to stir at room temperature for 2 h. The crude product was purified via Biotage SP4 (silica-packed 25 g SNAP cartridge; 0-30% EtOAc/hexanes) to provide the title compound as a pale yellow oil (208 mg, 90%).  $^1\text{H}$  NMR (400 MHz,  $\text{CDCl}_3$ )  $\delta$ : 7.15 (d,  $J = 8.4$  Hz, 1H), 6.90 (d,  $J = 8.4$  Hz, 1H), 5.38 (t,  $J = 7.2$  Hz, 1H), 3.90 (t,  $J = 4.8$  Hz, 4H), 3.33 (d,  $J = 7.2$  Hz, 2H), 3.15 (t,  $J = 4.8$  Hz, 4H), 1.80 (s, 3H), 1.78 (s, 3H) ppm.  $^{13}\text{C}$  NMR (100 MHz,  $\text{CDCl}_3$ )  $\delta$ : 149.5, 133.5, 132.1, 129.0, 123.7, 116.0, 67.0, 49.8, 33.5, 25.8, 17.8 ppm. IR (neat,  $\text{cm}^{-1}$ ): 2854, 1513, 1230, 1121, 926, 813. Anal. Calcd. for  $\text{C}_{15}\text{H}_{21}\text{NO}$ : C, 77.88; H, 9.15. Found: C, 77.76; H, 9.17. The  $\alpha/\gamma$  ratio was determined to be >99:1 by  $^1\text{H}$  NMR spectroscopy of the crude reaction mixture.

#### 1-(3-Methylbut-2-en-1-yl)-4-(trifluoromethyl)benzene (7b)

<sup>6</sup> Y, Yang, S. L. Buchwald, *J. Am. Chem. Soc.* **2013**, *135*, 10642–10645.

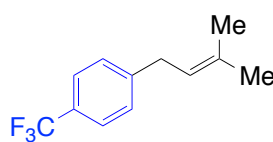

Following the general procedure, a THF solution of prenylzinc bromide (1.30 mmol, 1.60 mL, 0.81 M) and 4-chlorobenzotrifluoride (180 mg, 1.0 mmol) were used. The reaction mixture was allowed to stir at room temperature for 2 h. The coupling product was found to be highly volatile and the yield (89%) was determined by  $^1\text{H}$  NMR spectroscopy of the crude reaction mixture using 1,3,5-trimethoxybenzene as internal standard.  $^1\text{H}$  NMR (400 MHz,  $\text{CDCl}_3$ )  $\delta$ : 7.53 (d,  $J = 8.0$  Hz, 2H), 7.28 (d,  $J = 8.0$  Hz, 2H), 5.32 (t,  $J = 7.2$  Hz, 1H), 3.39 (d,  $J = 7.6$  Hz, 2H), 1.77 (s, 3H), 1.76 (s, 3H) ppm.  $^{13}\text{C}$  NMR (100 MHz,  $\text{CDCl}_3$ )  $\delta$ : 146.1, 133.8, 128.7, 128.0, 127.1 (q,  $J = 270$  Hz), 125.3 (q,  $J = 3.6$  Hz), 122.1, 34.3, 25.8, 18.0 ppm.  $^{19}\text{F}$  NMR (376 MHz,  $\text{CDCl}_3$ )  $\delta$ : -62.3 ppm. Spectral data were in accordance with those in literature.<sup>6</sup> The  $\alpha/\gamma$  ratio was determined to be >99:1 by  $^1\text{H}$  NMR spectroscopy of the crude reaction mixture.

#### ***Tert*-butyl 3-(3-methylbut-2-en-1-yl)benzoate (7c)**

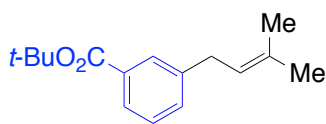

Following the general procedure, a THF solution of prenylzinc bromide (1.30 mmol, 1.60 mL, 0.81 M) and *tert*-butyl 3-bromobenzoate (257 mg, 1.0 mmol) were used. The reaction mixture was allowed to stir at room temperature for 2 h. The crude product was purified via Biotage SP4 (silica-packed 25 g SNAP cartridge; 0-8% EtOAc/hexanes) to provide the title compound as a colorless oil (235 mg, 95%).  $^1\text{H}$  NMR (400 MHz,  $\text{CDCl}_3$ )  $\delta$ : 7.81-7.78 (m, 2H), 7.34-7.29 (m, 2H), 5.32 (t,  $J = 7.2$  Hz, 1H), 3.28 (d,  $J = 7.2$  Hz, 2H), 1.75 (s, 3H), 1.73 (s, 3H), 1.59 (s, 9H) ppm.  $^{13}\text{C}$  NMR (100 MHz,  $\text{CDCl}_3$ )  $\delta$ : 165.9, 141.9, 132.9, 132.5, 132.1, 129.3, 128.2, 126.9, 122.7, 80.7, 34.2, 28.2, 25.7, 17.8 ppm. Spectral data were in accordance with those in literature.<sup>6</sup> The  $\alpha/\gamma$  ratio was determined to be >99:1 by  $^1\text{H}$  NMR spectroscopy of the crude reaction mixture.

#### **1,3,5-Triisopropyl-2-(3-methylbut-2-en-1-yl)benzene (7d)**

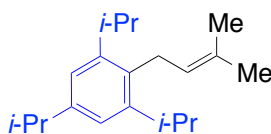

Following general procedure, a THF solution of prenylzinc bromide (1.30 mmol, 1.60 mL, 0.81 M) and bromo-2,4,6-triisopropylbenzene (227 mg, 253  $\mu\text{L}$ , 1.0 mmol) were used. The crude product was purified via Biotage SP4 (silica-packed 25 g SNAP cartridge; 100%

hexanes) to provide the title compound as a colorless oil (253 mg, 98%). <sup>1</sup>H NMR (400 MHz, CDCl<sub>3</sub>) δ: 7.19 (s, 2H), 5.25 (t, *J* = 6.0 Hz, 1H), 3.58 (d, *J* = 6.0 Hz, 2H), 3.36 (septet, *J* = 6.8 Hz, 2H), 3.06 (septet, *J* = 6.8 Hz, 1H), 1.95 (s, 3H), 1.87 (s, 3H), 1.45 (d, *J* = 6.8 Hz, 6H), 1.42 (d, *J* = 6.8 Hz, 12H) ppm. <sup>13</sup>C NMR (100 MHz, CDCl<sub>3</sub>) δ: 146.8, 146.4, 133.4, 130.7, 124.9, 121.0, 34.3, 29.4, 26.8, 25.8, 24.4, 24.3, 18.1 ppm. IR (neat, cm<sup>-1</sup>): 2958, 2868, 1458, 1362, 1097, 875. Anal. Calcd. for C<sub>18</sub>H<sub>28</sub>N<sub>4</sub>O<sub>2</sub>: C, 67.22; H, 6.94. Found: C, 67.02; H, 6.99. The α/γ ratio was determined to be >99:1 by <sup>1</sup>H NMR spectroscopy of the crude reaction mixture.

#### 4-(3-Methylbut-2-en-1-yl)phenol (7e)

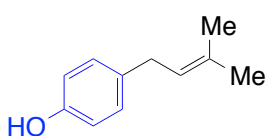

Following the general procedure, a THF solution of prenylzinc bromide (2.30 mmol, 2.85 mL, 0.81 M) and 4-bromophenol (173 mg, 1.0 mmol) were used. The reaction mixture was allowed to stir at room temperature for 12 h. The crude product was purified via Biotage SP4 (silica-packed 25 g SNAP cartridge; 0-15% EtOAc/hexanes) to provide the title compound as a colorless oil (154 mg, 95%). <sup>1</sup>H NMR (400 MHz, CDCl<sub>3</sub>) δ: 7.09 (d, *J* = 8.4 Hz, 2H), 6.82 (d, *J* = 8.4 Hz, 2H), 5.93 (s, 1H), 5.37 (t, *J* = 7.2 Hz, 1H), 3.33 (d, *J* = 7.2 Hz, 2H), 1.81 (s, 3H), 1.77 (s, 3H), 1.45 (d, *J* = 6.8 Hz, 6H), 1.42 (d, *J* = 6.8 Hz, 12H) ppm. <sup>13</sup>C NMR (100 MHz, CDCl<sub>3</sub>) δ: 153.3, 134.2, 132.3, 129.5, 123.7, 115.4, 33.5, 25.8, 17.8 ppm. IR (neat, cm<sup>-1</sup>): 3331, 2912, 1511, 1440, 1222, 818. Spectral data were in accordance with those in literature.<sup>7</sup> The α/γ ratio was determined to be >99:1 by <sup>1</sup>H NMR spectroscopy of the crude reaction mixture.

#### N-(4-(3-methylbut-2-en-1-yl)phenyl)acetamide (7f)

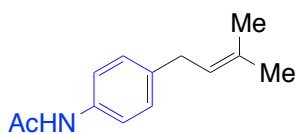

Following the general procedure, a THF solution of prenylzinc bromide (2.30 mmol, 2.85 mL, 0.81 M) and N-(4-bromophenyl)acetamide (214 mg, 1.0 mmol) were used. The reaction mixture was allowed to stir at room temperature for 12 h. The crude product was purified via Biotage SP4 (silica-packed 25 g SNAP cartridge; 0-15% EtOAc/hexanes) to provide the title compound as a slightly yellow solid (183 mg, 90%). <sup>1</sup>H NMR (400 MHz,

<sup>7</sup> T. Ollevier, Mwene-Mbeja, T, M. *Synthesis* **2006**, 23, 3963-3966.

CDCl<sub>3</sub>)  $\delta$ : 8.58 (s, 1H), 7.44 (d,  $J$  = 8.4 Hz, 2H), 7.09 (d,  $J$  = 8.4 Hz, 2H), 5.29 (t,  $J$  = 7.2 Hz, 1H), 3.30 (d,  $J$  = 7.2 Hz, 2H), 2.12 (s, 3H), 1.76 (s, 3H), 1.72 (s, 3H) ppm. <sup>13</sup>C NMR (100 MHz, CDCl<sub>3</sub>)  $\delta$ : 169.2, 137.7, 135.9, 132.5, 128.6, 123.1, 120.5, 33.7, 25.7, 24.2, 17.8 ppm. Spectral data were in accordance with those in literature.<sup>6</sup> The  $\alpha/\gamma$  ratio was determined to be >99:1 by <sup>1</sup>H NMR spectroscopy of the crude reaction mixture.

### ***Tert*-butyl 5-(3-methylbut-2-en-1-yl)-1H-indole-1-carboxylate (7g)**

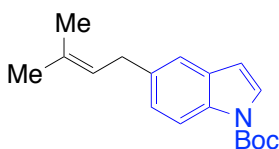

Following the general procedure, a THF solution of prenylzinc bromide (1.30 mmol, 1.60 mL, 0.81 M) and *N*-Boc-5-bromoindole (296 mg, 1.0 mmol) were used. The reaction mixture was allowed to stir at room temperature for 2 h. The crude product was purified via Biotage SP4 (silica-packed 25 g SNAP cartridge; 0-10% EtOAc/hexanes) to provide the title compound as a colorless oil (284 mg, 99%). <sup>1</sup>H NMR (400 MHz, CDCl<sub>3</sub>)  $\delta$ : 8.02 (d,  $J$  = 8.0 Hz, 1H), 7.55 (d,  $J$  = 3.2 Hz, 1H), 7.34 (d,  $J$  = 1.2 Hz, 1H), 7.13 (dd,  $J$  = 8.0, 1.2 Hz, 1H), 6.51 (d,  $J$  = 3.2 Hz, 1H), 5.38 (t,  $J$  = 4.4 Hz, 1H), 3.43 (d,  $J$  = 7.2 Hz, 2H), 1.758 (s, 3H), 1.755 (s, 3H), 1.67 (s, 9H) ppm. <sup>13</sup>C NMR (100 MHz, CDCl<sub>3</sub>)  $\delta$ : 149.9, 136.3, 133.7, 132.2, 130.9, 126.0, 125.0, 124.0, 120.2, 115.0, 107.3, 83.5, 34.3, 28.3, 25.9, 17.9 ppm. Spectral data were in accordance with those in literature.<sup>6</sup> The  $\alpha/\gamma$  ratio was determined to be >99:1 by <sup>1</sup>H NMR spectroscopy of the crude reaction mixture.

### **3-(3-Methylbut-2-en-1-yl)-1-(phenylsulfonyl)-1H-indole (7h)**

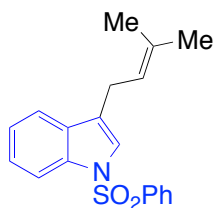

Following the general procedure, a THF solution of prenylzinc bromide (1.30 mmol, 1.60 mL, 0.81 M) and 1-phenylsulfonyl-3-bromoindole (336 mg, 1.0 mmol) were used. The reaction mixture was allowed to stir at room temperature for 2 h. The crude product was purified via Biotage SP4 (silica-packed 50 g SNAP cartridge; 0-10% EtOAc/hexanes) to provide the title compound as a colorless solid (172 mg, 53%). <sup>1</sup>H NMR (400 MHz, CDCl<sub>3</sub>)  $\delta$ : 8.05 (d,  $J$  = 8.0 Hz, 1H), 7.90 (d,  $J$  = 7.2 Hz, 2H), 7.52-7.49 (m, 2H), 7.38-7.34 (m, 2H), 7.27 (dd,  $J$  = 7.2, 7.2 Hz, 1H), 5.41 (t,  $J$  = 7.2 Hz, 1H), 3.39 (d,  $J$  = 7.2 Hz, 2H), 1.82 (s, 3H), 1.77 (s, 3H) ppm. <sup>13</sup>C NMR (100 MHz, CDCl<sub>3</sub>)  $\delta$ : 138.3, 135.6, 133.8, 133.7, 131.1, 129.2, 126.7, 124.8, 123.15, 123.09, 122.7, 120.8, 119.7, 113.8, 25.8, 23.9,

17.9 ppm. Spectral data were in accordance with those in literature.<sup>6</sup> The  $\alpha/\gamma$  ratio was determined to be >99:1 by <sup>1</sup>H NMR spectroscopy of the crude reaction mixture.

### 5-(3-Methylbut-2-en-1-yl)-1H-pyrrolo[2,3-b]pyridine (7i)

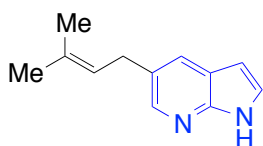

Following the general procedure, a THF solution of prenylzinc bromide (2.30 mmol, 2.87 mL, 0.81 M) and *tert*-butyl 3-bromobenzoate (257 mg, 1.0 mmol) were used. The reaction mixture was allowed to stir at room temperature for 12 h. The crude product was purified via Biotage SP4 (silica-packed 25 g SNAP cartridge; 0-100% EtOAc/hexanes) to provide the title compound as a yellowish solid (173 mg, 95%). m.p. = 157-158 °C. <sup>1</sup>H NMR (400 MHz, CDCl<sub>3</sub>)  $\delta$ : 8.01 (d,  $J$  = 1.2 Hz, 1H), 7.92 (d,  $J$  = 1.2 Hz, 1H), 7.37 (dd,  $J$  = 3.2, 2.0 Hz, 1H), 6.51 (dd,  $J$  = 3.2, 2.0 Hz, 1H), 5.32 (t,  $J$  = 7.2 Hz, 1H), 3.36 (d,  $J$  = 7.2 Hz, 2H), 1.70 (s, 3H), 1.65 (s, 3H) ppm. <sup>13</sup>C NMR (100 MHz, CDCl<sub>3</sub>)  $\delta$ : 145.4, 141.2, 133.9, 132.4, 129.7, 126.7, 123.2, 121.9, 101.2, 31.1, 25.6, 17.9 ppm. IR (neat, cm<sup>-1</sup>): 3363, 2930, 1591, 1325, 889, 726. HRMS-ESI ( $m/z$ ) [ $M + H$ ]<sup>+</sup> calcd for C<sub>12</sub>H<sub>14</sub>N<sub>2</sub>, 187.1230; found, 187.1222. The  $\alpha/\gamma$  ratio was determined to be >99:1 by <sup>1</sup>H NMR spectroscopy of the crude reaction mixture.

### 6-Methoxy-2-methyl-3-(3-methylbut-2-en-1-yl)pyridine (7j)

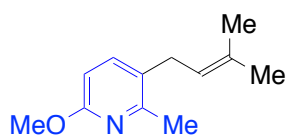

Following the general procedure, a THF solution of prenylzinc bromide (1.30 mmol, 1.62 mL, 0.81 M) and 3-bromo-6-methoxy-3-methylpyridine (201 mg, 1.0 mmol) were used. The reaction mixture was allowed to stir at room temperature for 2 h. The crude product was purified via Biotage SP4 (silica-packed 25 g SNAP cartridge; 0-5% EtOAc/hexanes) to provide the title compound as a yellowish liquid (140 mg, 73%). <sup>1</sup>H NMR (400 MHz, CDCl<sub>3</sub>)  $\delta$ : 7.30 (d,  $J$  = 8.4 Hz, 1H), 6.49 (d,  $J$  = 8.4 Hz, 1H), 5.19 (t,  $J$  = 7.2 Hz, 1H), 3.89 (s, 3H), 3.21 (d,  $J$  = 7.2 Hz, 1H), 2.41 (s, 3H), 1.73 (s, 3H), 1.71 (s, 3H) ppm. <sup>13</sup>C NMR (100 MHz, CDCl<sub>3</sub>)  $\delta$ : 161.9, 153.8, 139.4, 132.8, 127.1, 122.3, 107.2, 55.3, 30.6, 25.8, 22.0, 17.9 ppm. IR (neat, cm<sup>-1</sup>): 2913, 1473, 1423, 1304, 1040, 818. HRMS-ESI ( $m/z$ ) [ $M + H$ ]<sup>+</sup> calcd for C<sub>12</sub>H<sub>17</sub>NO, 192.1383; found, 192.1378. The  $\alpha/\gamma$  ratio was determined to be >99:1 by <sup>1</sup>H NMR spectroscopy of the crude reaction mixture.



### **Tert-butyl 4-(5-(3-methylbut-2-en-1-yl)pyrimidin-2-yl)piperazine-1-carboxylate (7k)**

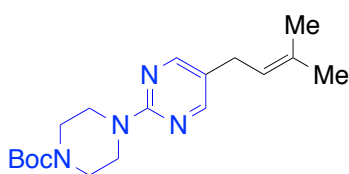

Following the general procedure, a THF solution of prenylzinc bromide (1.30 mmol, 1.62 mL, 0.81 M) and tert-butyl 4-(5-bromopyrimidin-2-yl)piperazine-1-carboxylate (343 mg, 1.0 mmol) were used. The reaction mixture was allowed to stir at room temperature for 12 h. The crude product was purified via Biotage SP4 (silica-packed 25 g SNAP cartridge; 0-20% EtOAc/hexanes) to provide the title compound as a yellowish liquid (259 mg, 78%). <sup>1</sup>H NMR (400 MHz, CDCl<sub>3</sub>) δ: 8.06 (s, 2H), 5.13 (t, *J* = 7.2 Hz, 1H), 3.69 (t, *J* = 4.8 Hz, 4H), 3.41 (t, *J* = 4.8 Hz, 4H), 3.05 (d, *J* = 7.2 Hz, 1H), 1.65 (s, 3H), 1.62 (s, 3H), 1.41 (s, 3H) ppm. <sup>13</sup>C NMR (100 MHz, CDCl<sub>3</sub>) δ: 160.7, 157.4, 154.8, 133.4, 122.7, 121.9, 79.8, 43.8, 28.4, 28.0, 25.6, 17.8 ppm. Spectral data were in accordance with those in literature.<sup>6</sup> The α/γ ratio was determined to be >99:1 by <sup>1</sup>H NMR spectroscopy of the crude reaction mixture.

### **1,3,5-Trimethyl-4-(3-methylbut-2-en-1-yl)-1H-pyrazole (7l)**

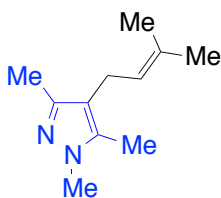

Following the general procedure, a THF solution of prenylzinc bromide (2.30 mmol, 2.87 mL, 0.81 M) and 4-bromo-1,3,5-trimethylpyrazole (189 mg, 1.0 mmol) were used. The reaction mixture was allowed to stir at room temperature for 12 h and then quenched with water (10 mL) and extracted with ethyl acetate (3 × 20 mL). The combined organic phases were dried over MgSO<sub>4</sub> and concentrated in vacuo. The crude product was purified via Biotage SP4 (silica-packed 25 g SNAP cartridge; 0-100% EtOAc/hexanes) to provide the title compound as a yellow oil (178 mg, 90%). <sup>1</sup>H NMR (400 MHz, CDCl<sub>3</sub>) δ: 4.96 (t, *J* = 7.2 Hz, 1H), 3.75 (s, 3H), 2.96 (d, *J* = 7.2 Hz, 2H), 2.10 (s, 3H), 2.09 (s, 3H), 1.66 (s, 3H), 1.63 (s, 3H) ppm. <sup>13</sup>C NMR (100 MHz, CDCl<sub>3</sub>) δ: 145.4, 135.8, 130.7, 123.1, 115.5, 35.7, 25.5, 22.4, 17.6, 11.7, 9.5 ppm. Spectral data were in accordance with those in literature.<sup>8</sup> The α/γ ratio was determined to be >99:1 by <sup>1</sup>H NMR spectroscopy of the crude reaction mixture.

<sup>8</sup> Farmer, J. L.; Hunter, H. N.; Organ, M. G. *J. Am. Chem. Soc.* **2012**, *134*, 17470-17473.

### (*E*)-5-(5-Methylhexa-1,4-dien-1-yl)benzo[*d*][1,3]dioxole (**8a**)

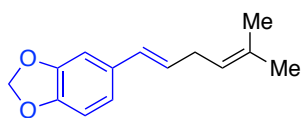

Following general procedure, a THF solution of prenylzinc bromide (1.30 mmol, 1.60 mL, 0.81 M) and (*E*)-5-(2-bromovinyl)benzo[*d*][1,3]dioxole (227 mg, 1.0 mmol) were used. The reaction mixture was allowed to stir at room temperature for 2 h. The crude product was purified via Biotage SP4 (silica-packed 25 g SNAP cartridge; 0-8% EtOAc/hexanes) to provide the title compound as a colorless oil (190 mg, 88%). <sup>1</sup>H NMR (400 MHz, CDCl<sub>3</sub>) δ: 6.93 (d, *J* = 1.2 Hz, 1H), 6.79-6.75 (m, 2H), 6.31 (d, *J* = 15.6 Hz, 1H), 6.07-6.03 (m, 1H), 5.94 (s, 2H), 5.25 (t, *J* = 7.2 Hz, 1H), 2.90 (dd, *J* = 7.2, 7.2 Hz, 2H), 1.78 (s, 3H), 1.70 (s, 3H) ppm. <sup>13</sup>C NMR (100 MHz, CDCl<sub>3</sub>) δ: 148.0, 146.6, 132.9, 132.4, 129.2, 127.8, 121.8, 120.4, 108.2, 105.5, 101.0, 31.7, 25.8, 17.8 ppm. IR (neat, cm<sup>-1</sup>): 2882, 1489, 1247, 1038, 961, 934. HRMS-ESI (*m/z*) [*M* + *H*]<sup>+</sup> calcd for C<sub>14</sub>H<sub>16</sub>O<sub>2</sub>, 217.1223; found, 217.1250. The α/γ ratio was determined to be >99:1 by <sup>1</sup>H NMR spectroscopy of the crude reaction mixture.

### 4-(3-Methylbut-2-en-1-yl)-1,2,3,6-tetrahydro-1,1'-biphenyl (**8b**)

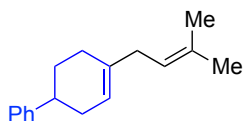

Following general procedure, a THF solution of prenylzinc bromide (0.65 mmol, 0.80 mL, 0.81 M) and cyclohex-1-en-1-yl nonaflate (115 mg, 0.50 mmol) were used. The reaction mixture was allowed to stir at room temperature for 2 h. The crude product was purified via Biotage SP4 (silica-packed 25 g SNAP cartridge; hexanes) to provide the title compound as a colorless oil (104 mg, 92%). <sup>1</sup>H NMR (400 MHz, CDCl<sub>3</sub>) δ: 7.38-7.34 (m, 2H), 7.28-7.23 (m, 3H), 5.57-5.56 (m, 1H), 5.28-5.25 (m, 1H), 2.82-2.78 (m, 1H), 2.75 (d, *J* = 6.8 Hz, 2H), 2.38-2.24 (m, 1H), 2.24-2.21 (m, 2H), 2.18-2.09 (m, 1H), 2.04-2.00 (m, 1H), 1.88-1.78 (m, 4H), 1.72 (s, 3H) ppm. <sup>13</sup>C NMR (100 MHz, CDCl<sub>3</sub>) δ: 147.5, 137.4, 132.7, 128.4, 127.0, 126.0, 122.4, 120.5, 40.4, 36.4, 33.8, 30.3, 29.4, 25.9, 17.8 ppm. IR (neat, cm<sup>-1</sup>): 2965, 2912, 1543, 1375, 754, 698. Anal. Calcd. for C<sub>17</sub>H<sub>22</sub>: C, 90.20; H, 9.80. Found: C, 90.26; H, 9.93. The α/γ ratio was determined to be >99:1 by <sup>1</sup>H NMR spectroscopy of the crude reaction mixture.

### Ethyl 4-(3-methylbut-2-en-1-yl)cyclohex-3-enecarboxylate (8c)

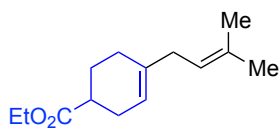

Following the general procedure, a THF solution of prenylzinc bromide (0.65 mmol, 0.80 mL, 0.81 M) and ethyl 4-(((trifluoromethyl)sulfonyl)oxy)cyclohex-3-enecarboxylate (151 mg, 0.5 mmol) were used. The reaction mixture was allowed to stir at room temperature for 2 h. The crude product was purified via Biotage SP4 (silica-packed 25 g SNAP cartridge; hexanes) to provide the title compound as a colorless oil (100 mg, 90%). <sup>1</sup>H NMR (400 MHz, CDCl<sub>3</sub>) δ: 5.78-5.70 (m, 1H), 5.13-5.08 (m, 1H), 4.12 (q, *J* = 6.8 Hz, 2H), 2.60 (d, *J* = 7.2 Hz, 2H), 2.49-2.43 (m, 1H), 2.23-2.20 (m, 2H), 2.02-1.96 (m, 3H), 1.72-1.64 (m, 4H), 1.60 (s, 3H), 1.24 (t, *J* = 6.8 Hz, 3H) ppm. <sup>13</sup>C NMR (100 MHz, CDCl<sub>3</sub>) δ: 176.1, 137.1, 132.8, 122.1, 118.9, 60.3, 39.6, 36.2, 27.9, 27.8, 25.9, 25.7, 17.8, 14.4 ppm. IR (neat, cm<sup>-1</sup>): 2925, 1733, 1376, 1222, 1164, 1032. Anal. Calcd. for C<sub>14</sub>H<sub>22</sub>O<sub>2</sub>: C, 75.63; H, 9.97. Found: C, 75.92; H, 9.95. The α/γ ratio was determined to be >99:1 by <sup>1</sup>H NMR spectroscopy of the crude reaction mixture.

### 3-(3-Methylbut-2-en-1-yl)-1,2-dihydronaphthalene (8d)

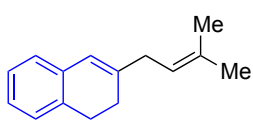

Following the general procedure, a THF solution of prenylzinc bromide (0.65 mmol, 0.80 mL, 0.81 M) and 3,4-dihydronaphthalen-2-yl trifluoromethanesulfonate (139 mg, 0.5 mmol) were used. The reaction mixture was allowed to stir at room temperature for 2 h. The crude product was purified via Biotage SP4 (silica-packed 25 g SNAP cartridge; hexanes) to provide the title compound as a colorless oil (94 mg, 95%). <sup>1</sup>H NMR (400 MHz, CDCl<sub>3</sub>) δ: 7.17-7.15 (m, 1H), 7.14-7.09 (m, 2H), 7.01 (d, *J* = 7.2 Hz, 1H), 6.24 (s, 1H), 5.30-5.27 (m, 1H), 2.91 (d, *J* = 7.2 Hz, 2H), 2.84 (t, *J* = 8.0 Hz, 2H), 2.71 (t, *J* = 8.0 Hz, 2H), 1.80 (d, *J* = 0.8 Hz, 3H), 1.71 (s, 3H) ppm. <sup>13</sup>C NMR (100 MHz, CDCl<sub>3</sub>) δ: 141.6, 135.2, 134.5, 133.6, 127.2, 126.5, 126.1, 125.5, 122.1, 121.3, 36.1, 28.3, 27.6, 26.0, 17.9 ppm. IR (neat, cm<sup>-1</sup>): 2925, 2882, 1485, 1451, 839, 753, 745. Anal. Calcd. for C<sub>15</sub>H<sub>18</sub>: C, 90.85; H, 9.15. Found: C, 91.02; H, 9.24. The α/γ ratio was determined to be >99:1 by <sup>1</sup>H NMR spectroscopy of the crude reaction mixture.

### 1,3-Dimethoxy-5-(2-(3-methylbut-2-en-1-yl)cyclopent-1-en-1-yl)benzene (8e)

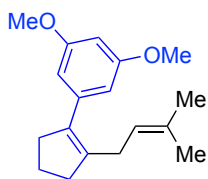

Following the general procedure, a THF solution of prenylzinc bromide (0.65 mmol, 0.80 mL, 0.81 M) and 2-(3,5-dimethoxyphenyl)cyclopent-1-en-1-yl trifluoromethanesulfonate (176 mg, 0.5 mmol) were used.

The reaction mixture was allowed to stir at room temperature for 12 h.

The crude product was purified via Biotage SP4 (silica-packed 25 g SNAP cartridge; hexanes) to provide the title compound as a colorless oil (125 mg, 92%).  $^1\text{H}$  NMR (600 MHz,  $\text{CDCl}_3$ )  $\delta$ : 6.452 (s, 2H), 6.448 (s, 2H), 5.20-5.17 (m, 1H), 3.80(s, 6H), 2.95 (d,  $J$  = 7.2 Hz, 2H), 2.73 (t,  $J$  = 7.2 Hz, 2H), 2.50 (t,  $J$  = 7.2 Hz, 2H), 1.92-1.87 (m, 1H), 1.73 (d,  $J$  = 0.6 Hz, 3H), 1.64 (s, 3H) ppm.  $^{13}\text{C}$  NMR (100 MHz,  $\text{CDCl}_3$ )  $\delta$ : 160.5, 140.9, 139.2, 135.2, 132.5, 122.0, 105.9, 98.5, 55.3, 37.7, 37.3, 28.7, 25.9, 22.0, 18.0 ppm. IR (neat,  $\text{cm}^{-1}$ ): 2837, 1419, 1203, 1151, 1065, 829. HRMS-ESI ( $m/z$ )  $[\text{M} + \text{H}]^+$  calcd for  $\text{C}_{18}\text{H}_{24}\text{O}_2$ , 273.1849; found, 273.1853. The  $\alpha/\gamma$  ratio was determined to be >99:1 by  $^1\text{H}$  NMR spectroscopy of the crude reaction mixture.

### (S)-1-Methyl-2-(3-methylbut-2-en-1-yl)-4-(prop-1-en-2-yl)cyclohex-1-ene (8f)

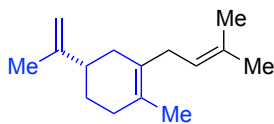

Following the general procedure, a THF solution of prenylzinc bromide (0.65 mmol, 0.80 mL, 0.81 M) and (S)-2-methyl-5-

(prop-1-en-2-yl)cyclohex-1-en-1-yl trifluoromethanesulfonate (142 mg, 0.5 mmol) were used. The reaction mixture was allowed to stir at room temperature for 2 h. The crude product was purified via Biotage SP4 (silica-packed 25 g SNAP cartridge; hexanes) to provide the title compound as a colorless oil (92 mg, 90%).  $^1\text{H}$  NMR (400 MHz,  $\text{CDCl}_3$ )  $\delta$ : 5.83-5.76 (m, 1H), 4.71 (m, 2H), 2.72-2.68 (m, 2H), 2.16-1.90 (m, 6H), 1.74 (s, 3H), 1.71 (s, 3H), 1.67 (s, 3H), 1.65 (s, 3H), 1.47-1.37 (m, 1H) ppm.  $^{13}\text{C}$  NMR (100 MHz,  $\text{CDCl}_3$ )  $\delta$ : 150.5, 131.5, 129.2, 125.6, 122.9, 108.4, 42.1, 35.1, 32.5, 32.4, 28.3, 25.9, 21.0, 18.8, 17.9 ppm. IR (neat,  $\text{cm}^{-1}$ ): 2967, 2917, 2831, 1644, 1436, 885. Anal. Calcd. for  $\text{C}_{15}\text{H}_{24}$ : C, 88.16; H, 11.84. Found: C, 88.33; H, 11.88. The  $\alpha/\gamma$  ratio was determined to be >99:1 by  $^1\text{H}$  NMR spectroscopy of the crude reaction mixture.

**(2R,8R,8aS)-8,8a-Dimethyl-6-(3-methylbut-2-en-1-yl)-2-(prop-1-en-2-yl)-1,2,3,7,8,8a-hexahydronaphthalene (8g)**

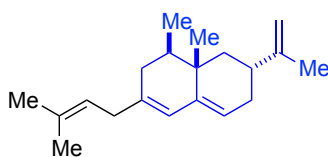

Following the general procedure, a THF solution of prenylzinc bromide (0.65 mmol, 0.80 mL, 0.81 M) and (4R,4aS,6R)-4,4a-dimethyl-6-(prop-1-en-2-yl)-3,4,4a,5,6,7-hexahydronaphthalen-2-yl trifluoromethanesulfonate (175 mg, 0.5 mmol) were used. The reaction mixture was allowed to stir at room temperature for 2 h. The crude product was purified via Biotage SP4 (silica-packed 25 g SNAP cartridge; hexanes) to provide the title compound as a colorless oil (128 mg, 95%). <sup>1</sup>H NMR (400 MHz, CDCl<sub>3</sub>) δ: 5.75 (s, 1H), 5.38-5.36 (m, 1H), 5.19-5.15 (m, 1H), 4.76-4.75 (m, 2H), 2.46 (d, *J* = 7.2 Hz, 2H), 2.46-2.40 (m, 1H), 2.22 (ddd, *J* = 18.4, 5.2, 5.2 Hz, 1H), 2.01-1.96 (m, 1H), 1.92-1.89 (m, 2H), 1.77 (s, 3H), 1.74 (s, 3H), 1.741-1.740 (m, 1H), 1.64 (s, 3H), 1.56-1.51 (m, 1H), 1.18 (t, *J* = 12.4 Hz, 1H), 0.91-0.90 (m, 6H) ppm. <sup>13</sup>C NMR (100 MHz, CDCl<sub>3</sub>) δ: 150.5, 142.6, 137.3, 132.8, 123.5, 122.0, 121.0, 108.7, 40.4, 39.3, 36.1, 36.0, 35.9, 35.8, 31.3, 25.9, 20.8, 17.9, 17.6, 14.9 ppm. IR (neat, cm<sup>-1</sup>): 2966, 2909, 2827, 1441, 1373, 885. HRMS-ESI (*m/z*) [*M* + H]<sup>+</sup> calcd for C<sub>20</sub>H<sub>30</sub>, 271.2420; found, 271.2432. The α/γ ratio was determined to be >99:1 by <sup>1</sup>H NMR spectroscopy of the crude reaction mixture.

**(8S,9S,10R,13R,17R)-10,13-dimethyl-3-(3-methylbut-2-en-1-yl)-17-((R)-6-methylheptan-2-yl)-2,7,8,9,10,11,12,13,14,15,16,17-dodecahydro-1H-cyclopenta[a]phenanthrene (8h)**

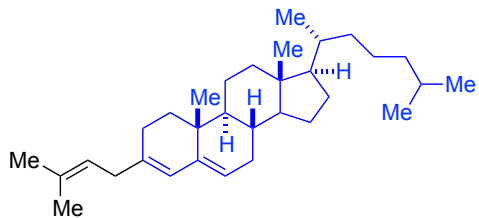

Following the general procedure, a THF solution of prenylzinc bromide (0.65 mmol, 0.80 mL, 0.81 M) and (8S,9S,10R,13R,17R)-10,13-dimethyl-17-((R)-6-methylheptan-2-yl)-2,7,8,9,10,11,12,13,14,15,16,17-dodecahydro-1H-cyclopenta[a]phenanthren-3-yl trifluoromethanesulfonate (258 mg, 0.5 mmol) were used. The reaction mixture was allowed to stir at room temperature for 2 h. The crude product was purified via Biotage SP4 (silica-packed 25 g SNAP cartridge; hexanes) to provide the title compound as a colorless oil (187 mg, 86%). <sup>1</sup>H NMR (400 MHz, CDCl<sub>3</sub>) δ: 5.71 (s, 1H), 5.33-5.32 (m, 1H), 5.19-5.15 (m, 1H), 2.70 (d, *J* = 7.2 Hz, 2H), 2.13-2.08 (m, 2H), 2.01-1.83 (m, 2H),

1.88-1.75 (m, 1H), 1.72 (d,  $J = 0.8$  Hz, 3H), 1.63-1.02 (m, 24H), 0.94-0.92 (m, 6H), 0.88 (d,  $J = 1.6$  Hz, 3H), 0.87 (d,  $J = 2.0$  Hz, 3H), 0.71 (s, 3H) ppm.  $^{13}\text{C}$  NMR (100 MHz,  $\text{CDCl}_3$ )  $\delta$ : 142.1, 136.5, 132.8, 123.9, 122.1, 121.5, 57.2, 56.3, 48.6, 42.6, 40.0, 39.7, 36.4, 36.1, 36.0, 35.1, 34.4, 32.02, 31.96, 28.4, 28.2, 26.5, 25.9, 24.4, 24.0, 23.0, 22.7, 21.3, 19.1, 18.9, 17.9, 12.1 ppm. IR (neat,  $\text{cm}^{-1}$ ): 2931, 2868, 1467, 1443, 1375, 892. HRMS-ESI ( $m/z$ )  $[\text{M} + \text{H}]^+$  calcd for  $\text{C}_{32}\text{H}_{53}$ , 437.4142; found, 437.4160. The  $\alpha/\gamma$  ratio was determined to be >99:1 by  $^1\text{H}$  NMR spectroscopy of the crude reaction mixture.

### 3-(3,7-Dimethylocta-2,6-dien-1-yl)-9-ethyl-9H-carbazole (9a)

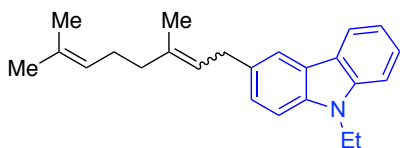

Following the general procedure, a THF solution of geranylzinc bromide (0.65 mmol, 1.20 mL, 0.56 M) and 3-bromo-9-ethyl-9H-carbazole (137 mg, 0.5 mmol) were used. The reaction mixture was allowed to stir at room temperature for 12 h. The crude product was purified via Biotage SP4 (silica-packed 25 g SNAP cartridge; 0-3% EtOAc/hexanes) to provide the title compound as a colorless oil (154 mg, 93%).  $^1\text{H}$  NMR (400 MHz,  $\text{CDCl}_3$ ) of the major stereoisomer  $\delta$ : 8.17 (d,  $J = 7.6$  Hz, 1H), 8.00 (s, 1H), 7.53 (ddd,  $J = 7.6, 7.2, 1.2$  Hz, 1H), 7.44 (d,  $J = 8.4$  Hz, 1H), 7.39-7.38 (m, 2H), 7.29 (ddd,  $J = 7.6, 7.2, 5.59-5.54$  (m, 1H), 5.31-5.29 (m, 1H), 4.38 (q,  $J = 7.2$  Hz, 2H), 3.65 (d,  $J = 7.2$  Hz, 2H), 2.37-2.30 (m, 2H), 2.27-2.18 (m, 2H), 1.89 (s, 3H), 1.80 (d,  $J = 0.8$  Hz, 3H), 1.76 (s, 3H), 1.48 (t,  $J = 7.2$  Hz, 3H) ppm.  $^{13}\text{C}$  NMR (100 MHz,  $\text{CDCl}_3$ )  $\delta$ : 140.3, 138.6, 135.7, 135.6, 132.3, 131.8, 126.4, 125.5, 124.5, 124.4, 123.2, 123.0, 120.5, 119.9, 118.6, 108.5, 39.9, 37.6, 34.4, 32.2, 26.9, 25.9, 16.4, 13.9 ppm. IR (neat,  $\text{cm}^{-1}$ ): 2913, 1484, 1470, 1324, 1230, 744. Anal. Calcd. for  $\text{C}_{24}\text{H}_{29}\text{N}$ : C, 86.96; H, 8.82. Found: C, 86.69; H, 8.92. The  $\alpha/\gamma$  ratio was determined to be >99:1 by  $^1\text{H}$  NMR spectroscopy of the crude reaction mixture. The  $E/Z$  ratio was determined to be 75:25 by  $^1\text{H}$  NMR and GC analysis of the crude reaction mixture.

### 2-((6E)-3,7,11-Trimethyldodeca-2,6,10-trien-1-yl)dibenzo[b,d]thiophene (9b)

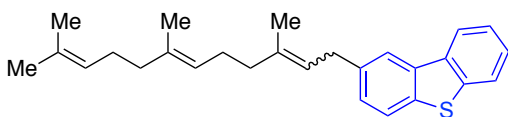

Following the general procedure, a THF solution of farnesylzinc bromide (0.65 mmol, 1.50 mL, 0.43 M) and 2-

bromodibenzo[b,d]thiophene (131 mg, 0.5 mmol) were used. The reaction mixture was allowed to stir at room temperature for 12 h. The crude product was purified via Biotage SP4 (silica-packed 25 g SNAP cartridge; 0-3% EtOAc/hexanes) to provide the title compound as a colorless oil (173 mg, 89%). <sup>1</sup>H NMR (400 MHz, CDCl<sub>3</sub>) of the major stereoisomer δ: 8.22-8.19 (m, 1H), 8.15 (d, *J* = 1.6 Hz, 1H), 7.88-7.86 (m, 1H), 7.81 (d, *J* = 8.4 Hz, 1H), 7.50-7.44 (m, 3H), 6.18 (dd, *J* = 17.2, 10.4 Hz, 1H), 5.23 (m, 4H), 2.10-2.06 (m, 2H), 2.02-1.95 (m, 2H), 1.91-1.87 (m, 2H), 1.72 (s, 3H), 1.64 (s, 3H), 1.56 (s, 3H), 1.55 (s, 3H). <sup>13</sup>C NMR (100 MHz, CDCl<sub>3</sub>) δ: 147.1, 144.1, 140.0, 137.0, 135.9, 135.6, 135.1, 131.4, 126.2, 126.5, 124.6, 124.5, 124.3, 123.0, 122.5, 121.6, 119.5, 112.2, 44.6, 41.4, 39.8, 26.8, 25.9, 25.5, 23.4, 17.8, 16.1. Spectral data were in accordance with those in literature.<sup>2</sup> The α/γ ratio was determined to be >99:1 by <sup>1</sup>H NMR spectroscopy of the crude reaction mixture. The *E/Z* ratio was determined to be 75:25 by GC analysis of the crude reaction mixture.

**(*E*)-5-(3-Cyclohexylbut-2-en-1-yl)-2,3-dihydrobenzofuran (9c)**

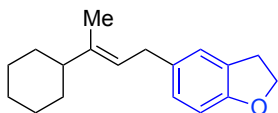

Following the general procedure, a THF solution of 3-methyl-3-cyclohexylallylzinc bromide (0.65 mmol, 2.50 mL, 0.26 M) and 5-bromo-2,3-dihydrobenzofuran (100 mg, 0.5 mmol) were used. The reaction mixture was allowed to stir at room temperature for 12 h. The crude product was purified via Biotage SP4 (silica-packed 25 g SNAP cartridge; 0-5% EtOAc/hexanes) to provide the title compound as a yellowish oil (118 mg, 92%). <sup>1</sup>H NMR (400 MHz, CDCl<sub>3</sub>) of the major stereoisomer δ: 7.03 (s, 1H), 6.94 (d, *J* = 8.0 Hz, 1H), 6.73 (d, *J* = 8.0 Hz, 1H), 5.35-5.33 (m, 1H), 4.56 (t, *J* = 8.4 Hz, 2H), 3.31 (d, *J* = 7.2 Hz, 2H), 3.20 (t, *J* = 8.4 Hz, 2H), 1.91-1.81 (m, 1H), 1.77-1.69 (m, 8H), 1.45-1.18 (m, 5H). <sup>13</sup>C NMR (100 MHz, CDCl<sub>3</sub>) δ: 158.3, 141.3, 134.0, 127.8, 127.0, 124.9, 123.4, 121.8, 71.2, 47.5, 33.5, 32.1, 30.0, 26.9, 26.5, 14.6. IR (neat, cm<sup>-1</sup>): 2921, 2850, 1490, 1242, 985, 812. Anal. Calcd. for C<sub>18</sub>H<sub>24</sub>O: C, 84.32; H, 9.44. Found: C, 84.03; H, 9.71. The α/γ ratio was determined to be >99:1 by <sup>1</sup>H NMR spectroscopy of the crude reaction mixture. The *E/Z* ratio was determined to be 84:16 by <sup>1</sup>H NMR and GC analysis of the crude reaction mixture.

**(E)-N,N-diethyl-4-(3,4,4-trimethylpent-2-en-1-yl)benzamide (9d)**

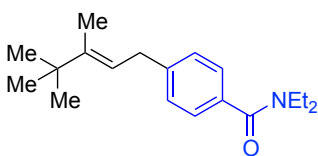

Following the general procedure, a THF solution of 3-methyl-3-*tert*-butylallylzinc bromide (0.65 mmol, 2.50 mL, 0.26 M) and 4-bromo-N,N-diethylbenzamide (143 mg, 0.5 mmol) were used. The reaction mixture was allowed to stir at room temperature for 12 h. The crude product was purified via Biotage SP4 (silica-packed 25 g SNAP cartridge; 0-30% EtOAc/hexanes) to provide the title compound as a colorless oil (118 mg, 92%). <sup>1</sup>H NMR (400 MHz, CDCl<sub>3</sub>) δ: 7.26 (d, *J* = 8.4 Hz, 2H), 7.15 (d, *J* = 8.4 Hz, 2H), 5.37-5.34 (m, 1H), 3.50 (broad, 2H), 3.33 (d, *J* = 7.2 Hz, 2H), 3.26 (broad, 2H), 1.67 (s, 3H), 1.23-1.10 (broad, 6H), 1.03 (s, 9H). <sup>13</sup>C NMR (100 MHz, CDCl<sub>3</sub>) δ: 171.5, 144.8, 143.2, 134.7, 128.3, 126.4, 119.1, 43.3 (broad), 39.2 (broad), 36.2, 24.2, 29.1, 14.2 (broad), 13.0. IR (neat, cm<sup>-1</sup>): 2964, 1630, 1422, 1284, 1093, 832. Anal. Calcd. for C<sub>19</sub>H<sub>29</sub>NO: C, 79.39; H, 10.17. Found: C, 79.16; H, 10.17. The α/γ ratio was determined to be >99:1 by <sup>1</sup>H NMR spectroscopy of the crude reaction mixture. The *E/Z* ratio was determined to be >99:1 by <sup>1</sup>H NMR and GC analysis of the crude reaction mixture.

**(E)-2,2-Dimethyl-1-(4-(3-phenylbut-2-en-1-yl)-5,6-dihydropyridin-1(2H)-yl)propan-1-one (9e)**

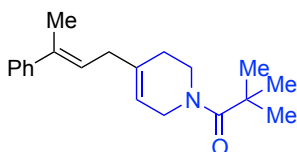

Following the general procedure, a THF solution of 3-methyl-3-phenylallylzinc phosphate (0.65 mmol, 2.00 mL, 0.33 M) and 1-pivaloyl-1,2,3,6-tetrahydropyridin-4-yl trifluoromethanesulfonate (158 mg, 0.5 mmol) were used. The reaction mixture was allowed to stir at room temperature for 12 h. The crude product was purified via Biotage SP4 (silica-packed 25 g SNAP cartridge; 0-30% EtOAc/hexanes) to provide the title compound as a colorless oil (111 mg, 75%). <sup>1</sup>H NMR (400 MHz, CDCl<sub>3</sub>) δ: 7.31-7.29 (m, 2H), 7.26-7.23 (m, 2H), 7.23-7.21 (m, 1H), 5.78 (td, *J* = 7.2, 1.6 Hz, 1H), 5.46-5.45 (m, 1H), 4.05 (d, *J* = 2.8 Hz, 2H), 3.69 (t, *J* = 6.0 Hz, 2H), 2.89 (d, *J* = 7.2 Hz, 2H), 2.13 (s, 2H), 2.04 (d, *J* = 0.4 Hz, 3H), 1.29 (s, 9H). <sup>13</sup>C NMR (100 MHz, CDCl<sub>3</sub>) δ: 176.6, 143.6, 136.8, 135.7, 128.3, 126.9, 125.7, 124.7, 118.6, 44.8, 42.7, 38.8, 36.1, 29.0, 28.3, 15.9. IR (neat, cm<sup>-1</sup>): 2972, 1625, 1416, 1175, 758, 697. HRMS-ESI (*m/z*) [M + H]<sup>+</sup> calcd



for C<sub>20</sub>H<sub>27</sub>NO, 298.2165; found, 298.2171. The  $\alpha/\gamma$  ratio was determined to be >99:1 by <sup>1</sup>H NMR spectroscopy of the crude reaction mixture. The *E/Z* ratio was determined to be >99:1 by <sup>1</sup>H NMR and GC analysis of the crude reaction mixture.

## Synthesis of Siamenol

### 2-Chloro-5-methoxy-*N*-(*p*-tolyl)aniline (12)

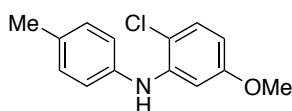

An oven-dried screw-cap test tube, which was equipped with a magnetic stir bar and fitted with a teflon septum, was charged with BrettPhos Precat (45 mg, 0.05 mmol, 1 mol%) and BrettPhos (27 mg, 0.05 mmol, 1 mol%), 4-bromotoluene (855 mg, 5 mmol, 1 equiv), 2-chloro-4-methoxyaniline (830 mg, 5.25 mmol, 1.05 equiv) and sodium *tert*-butoxide (576 mg, 6 mmol, 1.2 equiv). The test tube was evacuated and backfilled with argon (this process was repeated a total of three times). Dioxane (5 mL, 1.0 M) was added and the reaction mixture was heated at 80 °C for 1 h and then cooled to room temperature. The reaction mixture was allowed to pass through a silica plug eluting with EtOAc (30-50 mL), concentrated in vacuo, and purified via Biotage Isolera (0-10% EtOAc/hexanes, 50 g SNAP cartridge) to afford the title compound as a colorless oil (1.11 g, 90%). <sup>1</sup>H NMR (400 MHz, CDCl<sub>3</sub>)  $\delta$ : 7.29 (s, 1H), 7.25 (d, *J* = 5.6 Hz, 1H), 7.18 (d, *J* = 5.2 Hz, 2H), 7.12 (d, *J* = 5.2 Hz, 2H), 6.74 (d, *J* = 2.0 Hz, 1H), 6.35 (dd, *J* = 5.6, 2.0 Hz, 1H), 6.05 (s, 1H), 3.74 (s, 3H), 2.37 (s, 3H). <sup>13</sup>C NMR (100 MHz, CDCl<sub>3</sub>)  $\delta$ : 160.8, 143.9, 137.3, 131.1, 130.24, 130.22, 128.2, 122.6, 117.6, 111/4, 107.2, 104.6, 55.4, 20.5. IR (neat, cm<sup>-1</sup>): 3401, 1594, 1490, 1156, 1048, 687. Anal. Calcd. for C<sub>14</sub>H<sub>14</sub>ClNO: C, 67.88; H, 5.70. Found: C, 67.91; H, 5.69.

### 3-Bromo-2-methoxy-6-methyl-9*H*-carbazole (13)

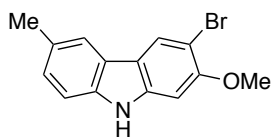

An oven-dried screw-cap test tube, which was equipped with a magnetic stir bar and fitted with a teflon septum, was charged with 2-chloro-5-methoxy-*N*-(*p*-tolyl)aniline (99 mg, 0.40 mmol), Pd(OAc)<sub>2</sub> (4.5 mg, 0.02 mmol), XPhos (19 mg, 0.04 mmol), pivalic acid (40 mg, 0.40 mmol) and K<sub>3</sub>PO<sub>4</sub> (170 mg, 0.8 mmol). The test tube was evacuated and backfilled with

argon (this process was repeated a total of three times). DMA (2 mL, 0.2 M) was added and the reaction mixture was heated at 180 °C for 12 h and then cooled to room temperature. The reaction mixture was washed with water and the combined aqueous layers were extracted with EtOAc. The Combined organic phases were dried over MgSO<sub>4</sub>, concentrated in vacuo and purified via Biotage Isolera (0-30% EtOAc/hexanes, 50 g SNAP cartridge) to afford the carbazole as a pale brown solid (70 mg, 83%). To the carbazole (40 mg, 0.19 mmol) was added NBS (35 mg, 0.20 mmol, 1.05 equiv) and carbon tetrachloride (2.5 mL). The reaction mixture was heated at 70 °C until the reaction went to completion as indicated by TLC (ca. 30 min). The reaction mixture was washed by water, and the aqueous phase was extracted with EtOAc. Combined organic phases were dried over MgSO<sub>4</sub>, concentrated in vacuo and purified via Biotage Isolera (0-30% EtOAc/hexanes, 25 g SNAP cartridge) to afforded the brominated carbazole as an off-white solid (55 mg, 99%). <sup>1</sup>H NMR (400 MHz, acetone) δ: 10.17 (s, 1H), 8.23 (s, 1H), 7.83 (d, *J* = 0.8 Hz, 1H), 7.35 (d, *J* = 8.4 Hz, 1H), 7.17-7.15 (m, 2H), 3.93 (s, 3H), 2.46 (s, 3H). <sup>13</sup>C NMR (100 MHz, acetone) δ: 155.7, 142.0, 139.8, 129.6, 127.5, 125.4, 123.9, 120.7, 118.9, 111.8, 103.6, 95.9, 57.1, 21.9. Spectral data were in accordance with those in literature.<sup>9</sup>

### 2-Methoxy-6-methyl-3-(3-methylbut-2-en-1-yl)-9H-carbazole (15)

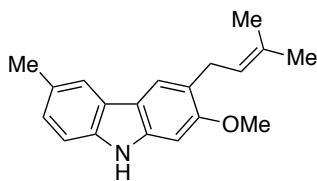

An oven-dried screw-cap test tube, which was equipped with a magnetic stir bar and fitted with a teflon septum, was charged with CPhos Precat (3.1 mg, 0.0038 mmol) and CPhos (1.7 mg, 0.0038 mmol) and 3-bromo-2-methoxy-6-methyl-9H-carbazole (55 mg, 0.19 mmol). The test tube was evacuated and backfilled with argon (this process was repeated a total of three times). THF (0.2 mL) was added. A THF solution of prenylzinc bromide (0.56 mL, 0.78 M, 0.44 mmol) was then added dropwise, and the reaction mixture was allowed to stir at room temperature for 2 h and then quenched by water and extracted with EtOAc. The combined organic phases were dried over MgSO<sub>4</sub>, concentrated in vacuo, and purified via Biotage Isolera (0-25% EtOAc/hexanes, 25 g SNAP cartridge) to afford the title compound as a white solid (51

<sup>9</sup> W. Kong, C. Fu, S. Ma, *Chem. Eur. J.* **2011**, *17*, 13134-13137.

mg, 96%).  $^1\text{H}$  NMR (400 MHz,  $\text{CDCl}_3$ )  $\delta$ : 7.80-7.77 (m, 2H), 7.46 (s, 1H), 7.15-7.13 (m, 2H), 6.60 (s, 1H), 5.47-5.43 (m, 1H), 3.82 (s, 3H), 2.54 (s, 3H), 3.48 (d,  $J = 7.2$  Hz, 2H), 1.809 (s, 3H), 1.807 (s, 3H).  $^{13}\text{C}$  NMR (100 MHz,  $\text{CDCl}_3$ )  $\delta$ : 157.0, 139.6, 137.7, 132.2, 128.6, 125.5, 123.8, 123.5, 122.7, 120.4, 119.5, 116.2, 110.1, 92.8, 55.6, 29.0, 26.0, 21.6, 17.9. Spectral data were in accordance with those in literature.<sup>9</sup>

### 6-Methyl-3-(3-methylbut-2-enyl)-9H-carbazol-2-ol (16)

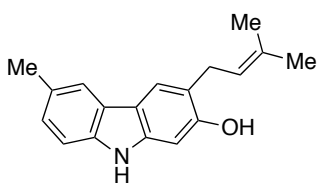

To an oven-dried test tube was added 2-methoxy-6-methyl-3-(3-methylbut-2-en-1-yl)-9H-carbazole (10 mg, 0.036 mmol). The test tube was evacuated and backfilled with argon (this process was repeated a total of three times).  $\text{MeMgI}$  (0.073 mL, 3 M in  $\text{Et}_2\text{O}$ , 0.22 mmol, 6.0 equiv) was added, and the solvent was removed under vacuum. The reaction mixture was heated at 180 °C for 10 min, during which time white smoke evaporated and vanished. The reaction mixture was then cooled to 0 °C, carefully diluted with  $\text{Et}_2\text{O}$  and quenched with water. The aqueous layer was extracted with  $\text{Et}_2\text{O}$  for 3 times and combined organic layers were dried over  $\text{MgSO}_4$ , concentrated in vacuo, and purified by column chromatography (2:1 hexanes/ $\text{EtOAc}$ ) to afford the title compound as a white solid (6.1 mg, 63%).  $^1\text{H}$  NMR (400 MHz,  $\text{CDCl}_3$ )  $\delta$ : 7.75 (s, 1H), 7.72 (s, 1H), 7.70 (broad, 1H), 7.23 (d,  $J = 8.0$  Hz, 1H), 7.14 (dd,  $J = 8.0, 1.2$  Hz, 1H, ArH), 6.81 (s, 1H), 5.43-5.39 (m, 1H, CH), 5.29 (s, 1H), 3.51 (d,  $J = 7.2$  Hz, 2H), 2.51 (s, 3H), 1.85 (s, 3H), 1.81 (s, 3H).  $^{13}\text{C}$  NMR (100 MHz,  $\text{CDCl}_3$ )  $\delta$ : 153.6, 140.0, 137.9, 134.9, 128.7, 125.8, 123.8, 122.8, 120.9, 119.6, 117.9, 110.1, 97.4, 30.6, 26.0, 21.6, 18.1. Spectral data were in accordance with those in literature.<sup>9</sup>

### Computed Reaction Coordinate

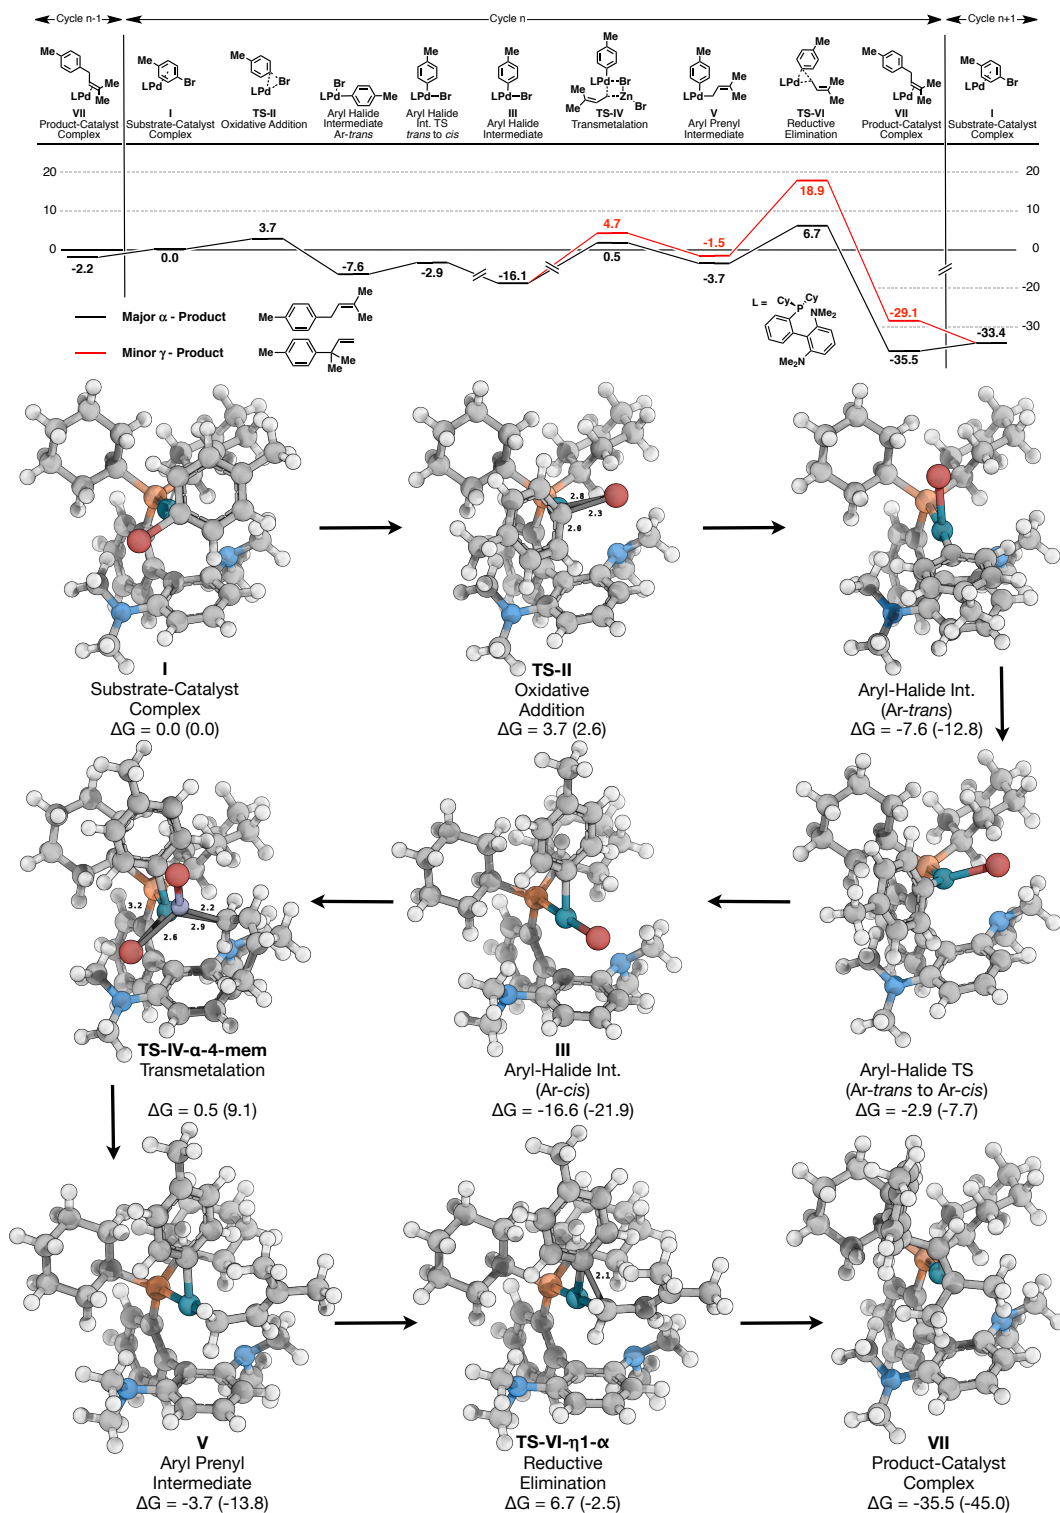

**Figure S1.** Reaction coordinate of Pd(0)-catalyzed cross-coupling of prenylZnBr with p-bromotoluene (above) and all structures (below).<sup>10</sup> All energies are displayed in kcal/mol,

<sup>10</sup> (a) The B3LYP hybrid functional with the 6-31G\* (for H, C, N, and P) and LANL2DZ+ECP (for Zn, Br and Pd) basis sets were used. (b) M. J. Frisch,; et al. Gaussian, Inc.: Pittsburgh, PA, 2004. (c) The B3LYP hybrid functional and PCM solvation model with tetrahydrofuran with the 6-31++G(d,p) (for H, C, N, and

solvation energies in parentheses and distances in Å. Computed structures are rendered in Pymol.<sup>11</sup>

### I Substrate-Catalyst Complex:

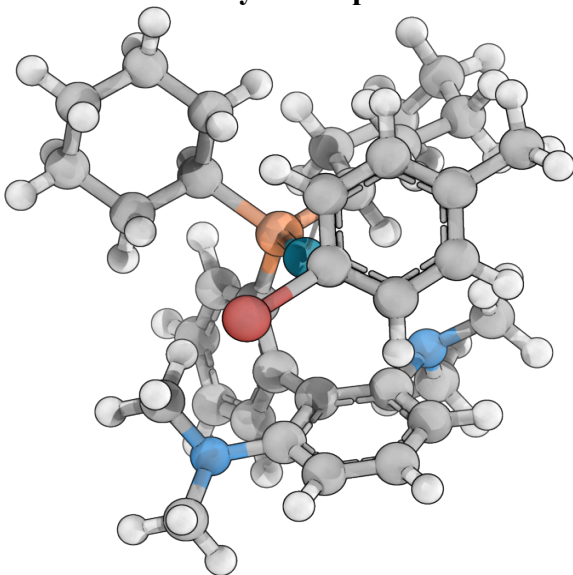

---

Using Gaussian 03: EM64L-G03RevE.01 11-Sep-2007

---

```
# b3lyp/gen pseudo=read gfprint ginput
scf=(direct,tight,maxcycle=300,xqc) opt=(maxcycle=250,gdiis) iop(1/8=18)
freq=noraman
#N Geom=AllCheck Guess=Read SCRF=Check Test GenChk RB3LYP/ChkBas Freq
```

---

```
Pointgroup= C1  Stoichiometry= C35H48BrN2PPd  C1[X(C35H48BrN2PPd)]
#Atoms= 88
Charge = 0 Multiplicity = 1
```

---

```
SCF Energy= -1953.40661501  Predicted Change= -3.929247D-08
```

---

```
Optimization completed on the basis of negligible forces. {Found 2 times}
```

| Item  | Max Val. | Criteria | Pass?   | RMS Val. | Criteria | Pass?   |
|-------|----------|----------|---------|----------|----------|---------|
| Force | 0.00000  | 0.00045  | [ YES ] | 0.00000  | 0.00030  | [ YES ] |
| Displ | 0.02082  | 0.00180  | [ NO ]  | 0.02082  | 0.00180  | [ NO ]  |

---

| Atomic Type | Coordinates (Angstroms) |          |           |
|-------------|-------------------------|----------|-----------|
|             | X                       | Y        | Z         |
| C           | 2.886710                | 4.287479 | -0.122124 |

---

P) and LANL2DZ+ECP (for Zn, Br and Pd) basis sets were used. (d) M. J. Frisch,; et al. Gaussian, Inc.: Wallingford, CT, 2010.

<sup>11</sup> *The PyMOL Molecular Graphics System, version 1.3*; Schrödinger, LLC.

|    |           |           |           |
|----|-----------|-----------|-----------|
| H  | 3.226395  | 5.315168  | -0.220653 |
| C  | 3.681545  | 3.331744  | 0.508026  |
| H  | 4.655657  | 3.596789  | 0.910798  |
| C  | 3.211714  | 2.026637  | 0.627225  |
| H  | 3.838730  | 1.308253  | 1.142633  |
| C  | 1.958247  | 1.620879  | 0.125078  |
| P  | 1.403834  | -0.146644 | 0.394273  |
| Pd | -0.875674 | -0.678074 | 0.332087  |
| C  | 2.473788  | -1.082347 | -0.868412 |
| H  | 2.358333  | -0.442949 | -1.753523 |
| C  | 2.142344  | -0.555551 | 2.089547  |
| H  | 3.230222  | -0.407380 | 2.056081  |
| C  | 1.157052  | 2.594077  | -0.526883 |
| C  | -0.196995 | 2.377091  | -1.147885 |
| C  | 1.644637  | 3.913174  | -0.623094 |
| H  | 1.017251  | 4.654572  | -1.108077 |
| C  | -0.339948 | 1.697749  | -2.383062 |
| N  | 0.802633  | 1.092861  | -3.005368 |
| C  | 0.513897  | -0.038491 | -3.879488 |
| H  | 1.452140  | -0.561939 | -4.095036 |
| H  | -0.163800 | -0.732670 | -3.375997 |
| H  | 0.071091  | 0.249658  | -4.850739 |
| C  | 1.704563  | 2.039782  | -3.667046 |
| H  | 1.254741  | 2.479586  | -4.575880 |
| H  | 1.977765  | 2.848268  | -2.988389 |
| H  | 2.621950  | 1.515724  | -3.959425 |
| C  | -1.591524 | 1.651509  | -3.017341 |
| H  | -1.695586 | 1.143610  | -3.969190 |
| C  | -2.694217 | 2.282160  | -2.453539 |
| H  | -3.656899 | 2.247000  | -2.958226 |
| C  | -2.567985 | 2.969540  | -1.251710 |
| H  | -3.437530 | 3.446494  | -0.814265 |
| C  | -1.330497 | 3.036941  | -0.591921 |
| N  | -1.191677 | 3.805180  | 0.596070  |
| C  | -0.934480 | 3.068159  | 1.832249  |
| H  | -1.856056 | 2.622874  | 2.244725  |
| H  | -0.226386 | 2.261610  | 1.654289  |
| H  | -0.508613 | 3.748413  | 2.579734  |
| C  | -2.151770 | 4.876749  | 0.805557  |
| H  | -2.275009 | 5.458415  | -0.112499 |
| H  | -3.147642 | 4.527932  | 1.135904  |
| H  | -1.763884 | 5.542522  | 1.585451  |
| C  | 1.877959  | -2.464160 | -1.216446 |
| H  | 1.904957  | -3.119125 | -0.335301 |
| H  | 0.819528  | -2.352468 | -1.476574 |
| C  | 2.651666  | -3.141221 | -2.361066 |

|    |           |           |           |
|----|-----------|-----------|-----------|
| H  | 2.227777  | -4.134541 | -2.559318 |
| H  | 2.520732  | -2.556508 | -3.283631 |
| C  | 4.150773  | -3.252220 | -2.048877 |
| H  | 4.294068  | -3.932532 | -1.195935 |
| H  | 4.687337  | -3.697265 | -2.896904 |
| C  | 4.742781  | -1.878767 | -1.703802 |
| H  | 5.803748  | -1.974567 | -1.437724 |
| H  | 4.701075  | -1.231400 | -2.592357 |
| C  | 3.977388  | -1.201520 | -0.551457 |
| H  | 4.121364  | -1.796120 | 0.361547  |
| H  | 4.411308  | -0.213837 | -0.362524 |
| C  | 1.886801  | -2.033423 | 2.459772  |
| H  | 0.805446  | -2.225540 | 2.422606  |
| H  | 2.345949  | -2.700985 | 1.722245  |
| C  | 2.426710  | -2.376481 | 3.859575  |
| H  | 2.195564  | -3.423538 | 4.095486  |
| H  | 3.524059  | -2.293246 | 3.857598  |
| C  | 1.851728  | -1.445936 | 4.935654  |
| H  | 0.768327  | -1.616169 | 5.020561  |
| H  | 2.284609  | -1.682073 | 5.916358  |
| C  | 2.104148  | 0.024604  | 4.578126  |
| H  | 1.643989  | 0.684587  | 5.324886  |
| H  | 3.185749  | 0.225481  | 4.608752  |
| C  | 1.561459  | 0.369741  | 3.180877  |
| H  | 0.466764  | 0.268809  | 3.181612  |
| H  | 1.782211  | 1.417568  | 2.949396  |
| C  | -2.481871 | -3.593858 | -1.434816 |
| C  | -2.289608 | -4.744505 | -2.394753 |
| H  | -3.201437 | -4.946241 | -2.970201 |
| H  | -2.016603 | -5.663960 | -1.867113 |
| H  | -1.493262 | -4.531692 | -3.120779 |
| C  | -2.133651 | -3.707171 | -0.089184 |
| H  | -1.729325 | -4.644819 | 0.285650  |
| C  | -2.319094 | -2.644169 | 0.815298  |
| H  | -2.167208 | -2.796271 | 1.877766  |
| C  | -2.880344 | -1.433362 | 0.342599  |
| Br | -3.794642 | -0.218191 | 1.670691  |
| C  | -3.217759 | -1.295558 | -1.026242 |
| H  | -3.659298 | -0.371464 | -1.380893 |
| C  | -3.005228 | -2.366006 | -1.889232 |
| H  | -3.266662 | -2.252137 | -2.939325 |

---

Statistical Thermodynamic Analysis

Temperature= 298.150 Kelvin      Pressure= 1.00000 Atm

---

SCF Energy= -1953.40661501      Predicted Change= -3.929247D-08

Zero-point correction (ZPE)= -1952.6449 0.76168  
Internal Energy (U)= -1952.6017 0.80486  
Enthalpy (H)= -1952.6008 0.80580  
Gibbs Free Energy (G)= -1952.7257 0.68081

---

Frequencies -- 7.0878 18.4940 26.8622  
 $\Delta G_{\text{Solvation}} = -0.00751849000016591$

**TS-II Oxidative Addition:**

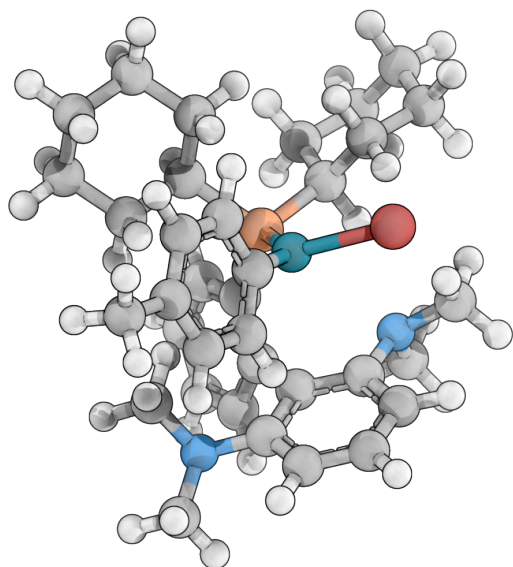

---

Using Gaussian 03: EM64L-G03RevE.01 11-Sep-2007

---

```
# b3lyp/gen pseudo=read gfpint gfinput
scf=(direct,tight,maxcycle=300,xqc)
opt=(maxcycle=250,calcf,ts,noeigentest,gdiis) iop(1/8=18) freq=noraman
#N Geom=AllCheck Guess=Read SCRF=Check Test GenChk RB3LYP/ChkBas Freq
```

---

```
Pointgroup= C1 Stoichiometry= C35H48BrN2PPd C1[X(C35H48BrN2PPd)]
#Atoms= 88
Charge = 0 Multiplicity = 1
```

---

```
SCF Energy= -1953.40310422 Predicted Change= -7.374393D-09
```

---

Optimization completed on the basis of negligible forces. {Found 2 times}

| Item  | Max Val. | Criteria | Pass?   | RMS Val. | Criteria | Pass?   |
|-------|----------|----------|---------|----------|----------|---------|
| Force | 0.00000  | 0.00045  | [ YES ] | 0.00000  | 0.00030  | [ YES ] |
| Displ | 0.00891  | 0.00180  | [ NO ]  | 0.00891  | 0.00180  | [ YES ] |

---

| Atomic Type | Coordinates (Angstroms) |   |   |
|-------------|-------------------------|---|---|
|             | X                       | Y | Z |

---

|   |          |          |          |
|---|----------|----------|----------|
| C | 2.789941 | 3.643699 | 2.346027 |
|---|----------|----------|----------|



|    |           |           |           |
|----|-----------|-----------|-----------|
| H  | 3.124070  | 4.583172  | 2.778322  |
| C  | 3.386627  | 2.438614  | 2.712662  |
| H  | 4.195694  | 2.416581  | 3.438031  |
| C  | 2.931809  | 1.253025  | 2.142739  |
| H  | 3.398303  | 0.327489  | 2.459712  |
| C  | 1.887650  | 1.216382  | 1.195114  |
| P  | 1.351996  | -0.440614 | 0.517472  |
| Pd | -0.831836 | -0.743594 | -0.401288 |
| C  | 1.551877  | -1.588615 | 2.008900  |
| H  | 2.594874  | -1.554295 | 2.351247  |
| C  | 2.783146  | -0.867471 | -0.656953 |
| H  | 2.891612  | 0.079418  | -1.202053 |
| C  | 1.279947  | 2.444572  | 0.826707  |
| C  | 0.146944  | 2.637007  | -0.144711 |
| C  | 1.750948  | 3.632599  | 1.422574  |
| H  | 1.273764  | 4.566492  | 1.142993  |
| C  | -1.089479 | 3.153113  | 0.337033  |
| N  | -1.272975 | 3.358873  | 1.734898  |
| C  | -1.406944 | 2.152443  | 2.548859  |
| H  | -2.399101 | 1.680721  | 2.432545  |
| H  | -1.266734 | 2.410664  | 3.605187  |
| H  | -0.651285 | 1.419622  | 2.271107  |
| C  | -2.233501 | 4.377298  | 2.128216  |
| H  | -2.080281 | 5.286817  | 1.540396  |
| H  | -2.071669 | 4.618784  | 3.185225  |
| H  | -3.289333 | 4.065588  | 2.020297  |
| C  | -2.105555 | 3.492295  | -0.568903 |
| H  | -3.051896 | 3.871995  | -0.200127 |
| C  | -1.916807 | 3.327185  | -1.937287 |
| H  | -2.710144 | 3.594340  | -2.631109 |
| C  | -0.713271 | 2.830269  | -2.421894 |
| H  | -0.573561 | 2.726305  | -3.491132 |
| C  | 0.331163  | 2.497522  | -1.543282 |
| N  | 1.592550  | 2.057505  | -2.060401 |
| C  | 1.543946  | 1.406760  | -3.366785 |
| H  | 1.386074  | 2.108849  | -4.205415 |
| H  | 0.750015  | 0.656066  | -3.380914 |
| H  | 2.502131  | 0.904808  | -3.540944 |
| C  | 2.648219  | 3.074099  | -2.026663 |
| H  | 2.464257  | 3.889427  | -2.749564 |
| H  | 3.605606  | 2.603856  | -2.279183 |
| H  | 2.735708  | 3.506532  | -1.029435 |
| C  | 0.644978  | -1.142963 | 3.176737  |
| H  | -0.397749 | -1.126341 | 2.827685  |
| H  | 0.892230  | -0.120789 | 3.483536  |
| C  | 0.758581  | -2.086692 | 4.386006  |

|    |           |           |           |
|----|-----------|-----------|-----------|
| H  | 0.079997  | -1.749774 | 5.180406  |
| H  | 1.776509  | -2.026723 | 4.799771  |
| C  | 0.452650  | -3.540235 | 4.000903  |
| H  | -0.602824 | -3.620655 | 3.701834  |
| H  | 0.585299  | -4.202351 | 4.866228  |
| C  | 1.343776  | -3.996005 | 2.838068  |
| H  | 1.080886  | -5.016571 | 2.530943  |
| H  | 2.390262  | -4.032726 | 3.176414  |
| C  | 1.235318  | -3.051846 | 1.627600  |
| H  | 0.218192  | -3.098081 | 1.212315  |
| H  | 1.909837  | -3.400621 | 0.838520  |
| C  | 4.137980  | -1.208052 | -0.006169 |
| H  | 4.048709  | -2.130335 | 0.585443  |
| H  | 4.446168  | -0.413942 | 0.681750  |
| C  | 5.234276  | -1.408510 | -1.068973 |
| H  | 6.180100  | -1.675202 | -0.579235 |
| H  | 5.408922  | -0.453988 | -1.587201 |
| C  | 4.841496  | -2.478354 | -2.097290 |
| H  | 4.777140  | -3.455816 | -1.595971 |
| H  | 5.619526  | -2.572535 | -2.865920 |
| C  | 3.487235  | -2.150417 | -2.741848 |
| H  | 3.190786  | -2.946071 | -3.437269 |
| H  | 3.586569  | -1.233695 | -3.341773 |
| C  | 2.386161  | -1.949277 | -1.686316 |
| H  | 2.210129  | -2.906327 | -1.177604 |
| H  | 1.439462  | -1.680669 | -2.166831 |
| C  | -3.538071 | -0.027833 | -0.755461 |
| H  | -3.283600 | 0.862682  | -1.319032 |
| C  | -2.764592 | -1.193794 | -0.882961 |
| C  | -3.124790 | -2.377481 | -0.214971 |
| H  | -2.566640 | -3.292229 | -0.383010 |
| C  | -4.219650 | -2.353102 | 0.651871  |
| H  | -4.489502 | -3.261471 | 1.186933  |
| C  | -4.987928 | -1.193303 | 0.830107  |
| C  | -6.204711 | -1.199565 | 1.726342  |
| H  | -7.117248 | -1.434942 | 1.161544  |
| H  | -6.360599 | -0.223052 | 2.198204  |
| H  | -6.113819 | -1.947757 | 2.521118  |
| C  | -4.623747 | -0.037566 | 0.121810  |
| H  | -5.206882 | 0.872731  | 0.247699  |
| Br | -1.786749 | -1.512311 | -2.906652 |

---

Statistical Thermodynamic Analysis

Temperature= 298.150 Kelvin      Pressure= 1.00000 Atm

---

SCF Energy= -1953.40310422    Predicted Change= -7.374393D-09

Zero-point correction (ZPE)= -1952.6410 0.76202  
Internal Energy (U)= -1952.5987 0.80433  
Enthalpy (H)= -1952.5978 0.80528  
Gibbs Free Energy (G)= -1952.7199 0.68314

---

Frequencies -- -94.7250 8.1236 19.9197  
 $\Delta G_{\text{Solvation}} = -0.009271119999999397$

**Aryl Halide Intermediate (Ar-trans):**

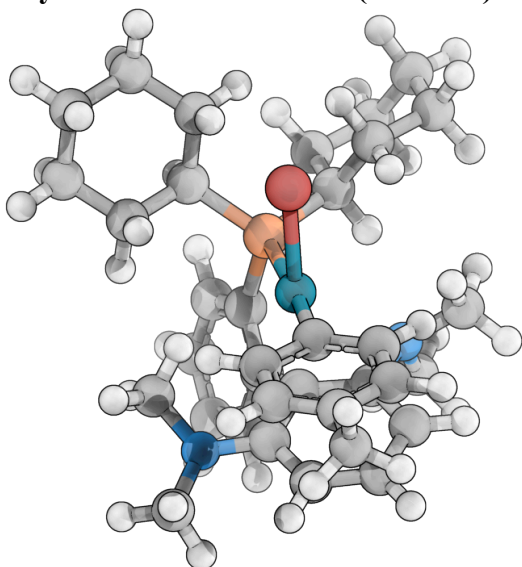

---

Using Gaussian 03: EM64L-G03RevE.01 11-Sep-2007

---

```
# b3lyp/gen pseudo=read gfpint gfinput  
scf=(direct,tight,maxcycle=300,xqc) opt=(maxcycle=250) freq=noraman  
#N Geom=AllCheck Guess=Read SCRF=Check GenChk RB3LYP/ChkBas Freq
```

---

```
Pointgroup= C1 Stoichiometry= C35H48BrN2PPd C1[X(C35H48BrN2PPd)]  
#Atoms= 88  
Charge = 0 Multiplicity = 1
```

---

```
SCF Energy= -1953.42433037 Predicted Change= -5.019004D-07
```

---

```
Optimization completed. {Found 1 times}
```

| Item  | Max Val. | Criteria | Pass?   | RMS Val. | Criteria | Pass?   |
|-------|----------|----------|---------|----------|----------|---------|
| Force | 0.00000  | 0.00045  | [ YES ] | 0.00000  | 0.00030  | [ YES ] |
| Displ | 0.02019  | 0.00180  | [ NO ]  | 0.02019  | 0.00180  | [ NO ]  |

---

| Atomic Type | Coordinates (Angstroms) |   |   |
|-------------|-------------------------|---|---|
|             | X                       | Y | Z |

---

|   |          |          |          |
|---|----------|----------|----------|
| C | 1.350420 | 4.305700 | 1.959891 |
| H | 1.244931 | 5.300398 | 2.384825 |

|    |           |           |           |
|----|-----------|-----------|-----------|
| C  | 2.572394  | 3.635655  | 2.020078  |
| H  | 3.433040  | 4.096696  | 2.497062  |
| C  | 2.679226  | 2.361160  | 1.467593  |
| H  | 3.629833  | 1.842973  | 1.539727  |
| C  | 1.586927  | 1.727935  | 0.848309  |
| P  | 1.685032  | 0.012614  | 0.160658  |
| Pd | -0.696419 | -0.550017 | -0.194593 |
| C  | 2.810167  | 0.175077  | -1.350065 |
| H  | 2.372838  | 1.052463  | -1.842350 |
| C  | 2.688996  | -0.900662 | 1.474587  |
| H  | 3.601676  | -0.310393 | 1.644194  |
| C  | 0.347517  | 2.402591  | 0.792194  |
| C  | -0.921893 | 1.887204  | 0.133523  |
| C  | 0.258345  | 3.692169  | 1.351290  |
| H  | -0.691783 | 4.216582  | 1.306715  |
| C  | -1.047157 | 2.031381  | -1.301322 |
| N  | 0.140932  | 2.156029  | -2.100193 |
| C  | 0.063377  | 1.501865  | -3.406163 |
| H  | 1.069037  | 1.466214  | -3.838876 |
| H  | -0.297618 | 0.477755  | -3.283066 |
| H  | -0.585623 | 2.025099  | -4.129939 |
| C  | 0.601982  | 3.542543  | -2.240441 |
| H  | -0.086582 | 4.152209  | -2.852242 |
| H  | 0.704356  | 4.011821  | -1.260992 |
| H  | 1.584603  | 3.542988  | -2.725725 |
| C  | -2.300867 | 2.155664  | -1.899558 |
| H  | -2.380464 | 2.251275  | -2.976150 |
| C  | -3.450221 | 2.207251  | -1.113733 |
| H  | -4.421290 | 2.315872  | -1.588693 |
| C  | -3.381884 | 2.097637  | 0.264400  |
| H  | -4.300795 | 2.086478  | 0.835076  |
| C  | -2.145557 | 1.923434  | 0.917978  |
| N  | -2.112665 | 1.846759  | 2.299040  |
| C  | -1.119821 | 1.043547  | 3.003834  |
| H  | -1.617335 | 0.473001  | 3.796483  |
| H  | -0.664303 | 0.325554  | 2.316566  |
| H  | -0.328119 | 1.653244  | 3.456490  |
| C  | -3.299648 | 2.175350  | 3.076112  |
| H  | -3.762645 | 3.093011  | 2.702727  |
| H  | -4.052611 | 1.371893  | 3.067481  |
| H  | -2.998198 | 2.352577  | 4.112255  |
| C  | 2.647360  | -1.025245 | -2.311960 |
| H  | 3.003376  | -1.945658 | -1.834241 |
| H  | 1.587281  | -1.193553 | -2.526515 |
| C  | 3.433919  | -0.807544 | -3.615995 |
| H  | 3.331620  | -1.691270 | -4.258335 |

|    |           |           |           |
|----|-----------|-----------|-----------|
| H  | 2.994928  | 0.034557  | -4.172221 |
| C  | 4.915321  | -0.510086 | -3.344471 |
| H  | 5.386329  | -1.395739 | -2.892917 |
| H  | 5.447025  | -0.319105 | -4.285487 |
| C  | 5.071652  | 0.684927  | -2.394216 |
| H  | 6.131962  | 0.865083  | -2.173911 |
| H  | 4.696640  | 1.593444  | -2.888653 |
| C  | 4.298647  | 0.473844  | -1.078396 |
| H  | 4.757847  | -0.358760 | -0.528754 |
| H  | 4.403685  | 1.366893  | -0.452651 |
| C  | 3.118925  | -2.319703 | 1.039801  |
| H  | 2.227782  | -2.908227 | 0.792854  |
| H  | 3.728027  | -2.275174 | 0.131214  |
| C  | 3.922550  | -3.024881 | 2.146950  |
| H  | 4.185403  | -4.037327 | 1.815304  |
| H  | 4.872445  | -2.491686 | 2.307412  |
| C  | 3.146420  | -3.081134 | 3.469282  |
| H  | 2.254197  | -3.709784 | 3.338650  |
| H  | 3.755245  | -3.554172 | 4.250576  |
| C  | 2.715200  | -1.675165 | 3.906614  |
| H  | 2.116819  | -1.724704 | 4.825632  |
| H  | 3.608234  | -1.078383 | 4.146831  |
| C  | 1.909688  | -0.964194 | 2.806261  |
| H  | 0.969210  | -1.506593 | 2.638941  |
| H  | 1.647450  | 0.046579  | 3.139256  |
| C  | -3.412028 | -1.324021 | 0.780203  |
| H  | -2.939002 | -1.336077 | 1.759443  |
| C  | -2.662493 | -1.034914 | -0.364879 |
| C  | -3.297451 | -1.080204 | -1.608474 |
| H  | -2.735261 | -0.903453 | -2.521690 |
| C  | -4.665886 | -1.359093 | -1.698145 |
| H  | -5.140818 | -1.387317 | -2.678098 |
| C  | -5.430938 | -1.621416 | -0.555802 |
| C  | -6.899601 | -1.967450 | -0.660130 |
| H  | -7.457098 | -1.630677 | 0.221633  |
| H  | -7.359216 | -1.509808 | -1.543541 |
| H  | -7.052277 | -3.052411 | -0.742371 |
| C  | -4.779833 | -1.598337 | 0.684847  |
| H  | -5.346925 | -1.810545 | 1.590570  |
| Br | -0.340242 | -3.062202 | -0.476314 |

---

Statistical Thermodynamic Analysis

Temperature= 298.150 Kelvin      Pressure= 1.00000 Atm

---

SCF Energy= -1953.42433037      Predicted Change= -5.019004D-07

Zero-point correction (ZPE)= -1952.6610 0.76330

Internal Energy (U)= -1952.6182 0.80603  
Enthalpy (H)= -1952.6173 0.80698  
Gibbs Free Energy (G)= -1952.7379 0.68641

---

Frequencies -- 18.1927 27.7029 33.3282  
 $\Delta G_{\text{Solvation}} = -0.0157666000000063$

**Ar-trans to Ar-cis TS:**

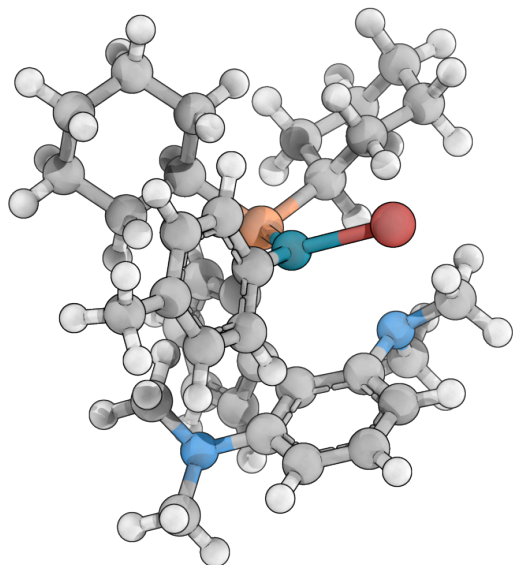

---

Using Gaussian 03: EM64L-G03RevE.01 11-Sep-2007

---

```
# b3lyp/gen pseudo=read gfpri n gfinpu t  
scf=(direct,tight,maxcycle=300,xqc)  
opt=(maxcycle=250,calcfc,ts,noeigentest,gdiis) iop(1/8=18) freq=noraman  
#N Geom=AllCheck Guess=Read SCRF=Check Test GenChk RB3LYP/ChkBas Freq
```

---

```
Pointgroup= C1 Stoichiometry= C35H48BrN2PPd C1[X(C35H48BrN2PPd)]  
#Atoms= 88  
Charge = 0 Multiplicity = 1
```

---

```
SCF Energy= -1953.41397203 Predicted Change= -1.743349D-09
```

---

```
Optimization completed on the basis of negligible forces. {Found 2 times}
```

| Item  | Max Val. | Criteria | Pass?   | RMS Val. | Criteria | Pass?   |
|-------|----------|----------|---------|----------|----------|---------|
| Force | 0.00000  | 0.00045  | [ YES ] | 0.00000  | 0.00030  | [ YES ] |
| Displ | 0.00363  | 0.00180  | [ NO ]  | 0.00363  | 0.00180  | [ YES ] |

---

| Atomic Type | Coordinates (Angstroms) |   |   |
|-------------|-------------------------|---|---|
|             | X                       | Y | Z |

---

|   |          |          |          |
|---|----------|----------|----------|
| C | 2.852907 | 3.465340 | 2.607518 |
|---|----------|----------|----------|

|    |           |           |           |
|----|-----------|-----------|-----------|
| H  | 3.208610  | 4.376642  | 3.080801  |
| C  | 3.306954  | 2.218441  | 3.034848  |
| H  | 4.021748  | 2.136205  | 3.849280  |
| C  | 2.830623  | 1.070044  | 2.409278  |
| H  | 3.182449  | 0.110686  | 2.771219  |
| C  | 1.904950  | 1.116183  | 1.346425  |
| P  | 1.325960  | -0.491259 | 0.601483  |
| Pd | -0.892323 | -0.675418 | -0.702558 |
| C  | 2.844526  | -1.093070 | -0.368020 |
| H  | 3.134943  | -0.171829 | -0.889012 |
| C  | 1.171643  | -1.628459 | 2.104819  |
| H  | 2.142902  | -1.673200 | 2.615709  |
| C  | 1.438342  | 2.386181  | 0.917417  |
| C  | 0.438718  | 2.648290  | -0.174721 |
| C  | 1.929270  | 3.535049  | 1.570678  |
| H  | 1.562682  | 4.502556  | 1.243909  |
| C  | 0.751703  | 2.430983  | -1.541367 |
| N  | 2.015292  | 1.862993  | -1.903270 |
| C  | 2.059910  | 1.200336  | -3.205698 |
| H  | 2.982870  | 0.613133  | -3.264183 |
| H  | 1.208889  | 0.523889  | -3.314759 |
| H  | 2.067320  | 1.905584  | -4.055783 |
| C  | 3.154557  | 2.775267  | -1.753624 |
| H  | 3.138590  | 3.583257  | -2.506584 |
| H  | 3.163560  | 3.225745  | -0.760882 |
| H  | 4.084871  | 2.209730  | -1.880201 |
| C  | -0.170253 | 2.797253  | -2.535161 |
| H  | 0.061919  | 2.626748  | -3.578921 |
| C  | -1.376201 | 3.397352  | -2.196275 |
| H  | -2.077456 | 3.678295  | -2.977543 |
| C  | -1.686312 | 3.644186  | -0.863111 |
| H  | -2.632587 | 4.109675  | -0.610880 |
| C  | -0.793733 | 3.279198  | 0.156628  |
| N  | -1.100760 | 3.570133  | 1.518375  |
| C  | -1.414651 | 2.420253  | 2.364002  |
| H  | -2.409745 | 1.996057  | 2.141423  |
| H  | -0.671564 | 1.635594  | 2.229446  |
| H  | -1.397006 | 2.729371  | 3.415633  |
| C  | -2.015014 | 4.675816  | 1.760955  |
| H  | -1.729769 | 5.539251  | 1.153428  |
| H  | -3.074697 | 4.437558  | 1.553122  |
| H  | -1.945305 | 4.959133  | 2.817565  |
| C  | 2.467626  | -2.136440 | -1.444146 |
| H  | 2.107726  | -3.056933 | -0.966138 |
| H  | 1.639035  | -1.769900 | -2.058762 |
| C  | 3.674460  | -2.482884 | -2.332979 |

|    |           |           |           |
|----|-----------|-----------|-----------|
| H  | 3.382922  | -3.247421 | -3.063808 |
| H  | 3.965700  | -1.593936 | -2.912073 |
| C  | 4.875656  | -2.959629 | -1.505246 |
| H  | 4.626340  | -3.914832 | -1.019433 |
| H  | 5.736757  | -3.156364 | -2.156675 |
| C  | 5.246488  | -1.926948 | -0.431906 |
| H  | 6.074896  | -2.294861 | 0.187460  |
| H  | 5.605364  | -1.009124 | -0.920704 |
| C  | 4.045705  | -1.577807 | 0.467710  |
| H  | 3.765118  | -2.469857 | 1.045132  |
| H  | 4.349120  | -0.811248 | 1.188219  |
| C  | 0.797995  | -3.067433 | 1.682183  |
| H  | -0.129305 | -3.042467 | 1.091992  |
| H  | 1.568209  | -3.488898 | 1.028244  |
| C  | 0.605077  | -3.990368 | 2.898741  |
| H  | 0.308664  | -4.989332 | 2.554484  |
| H  | 1.567583  | -4.112335 | 3.418018  |
| C  | -0.431831 | -3.430730 | 3.880817  |
| H  | -1.419854 | -3.416822 | 3.397801  |
| H  | -0.519557 | -4.085511 | 4.757107  |
| C  | -0.059694 | -2.006407 | 4.312554  |
| H  | -0.829947 | -1.592294 | 4.975626  |
| H  | 0.872565  | -2.034891 | 4.896409  |
| C  | 0.128190  | -1.077287 | 3.101142  |
| H  | -0.836718 | -0.964760 | 2.584602  |
| H  | 0.422370  | -0.079951 | 3.445389  |
| C  | -3.355245 | -2.102041 | -0.046275 |
| H  | -2.773075 | -3.014210 | -0.131515 |
| C  | -2.826675 | -0.874434 | -0.445615 |
| C  | -3.603530 | 0.283565  | -0.441650 |
| H  | -3.208921 | 1.221017  | -0.821876 |
| C  | -4.902421 | 0.219674  | 0.075520  |
| H  | -5.506814 | 1.124613  | 0.098174  |
| C  | -5.445872 | -0.984938 | 0.541284  |
| C  | -6.845651 | -1.039045 | 1.110049  |
| H  | -6.838829 | -0.936152 | 2.203939  |
| H  | -7.471198 | -0.232888 | 0.712080  |
| H  | -7.336185 | -1.991013 | 0.878691  |
| C  | -4.655705 | -2.140444 | 0.466099  |
| H  | -5.066382 | -3.093657 | 0.793774  |
| Br | -1.399376 | -1.396117 | -3.068185 |

---

Statistical Thermodynamic Analysis

Temperature= 298.150 Kelvin      Pressure= 1.00000 Atm

---

SCF Energy= -1953.41397203      Predicted Change= -1.743349D-09



Zero-point correction (ZPE)= -1952.6513 0.76258  
 Internal Energy (U)= -1952.6090 0.80487  
 Enthalpy (H)= -1952.6081 0.80581  
 Gibbs Free Energy (G)= -1952.7304 0.68349

---

Frequencies -- -64.1653 9.7209 22.6338

$\Delta G_{\text{Solvation}} = -0.01519017999999905$

### III Aryl Halide Intermediate (Ar-cis):

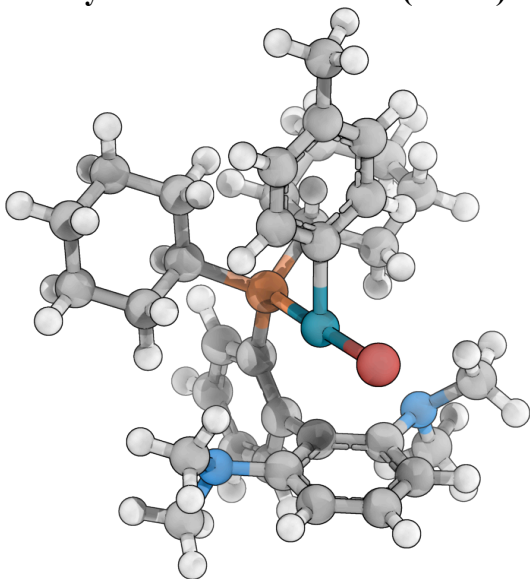


---

Using Gaussian 03: EM64L-G03RevE.01 11-Sep-2007

---

```
# b3lyp/gen pseudo=read gfpint gfinput
scf=(direct,tight,maxcycle=300,xqc) opt=(maxcycle=250) freq=noraman
#N Geom=AllCheck Guess=Read SCRF=Check GenChk RB3LYP/ChkBas Freq
```

---

```
Pointgroup= C1 Stoichiometry= C35H48BrN2PPd C1[X(C35H48BrN2PPd)]
#Atoms= 88
Charge = 0 Multiplicity = 1
```

---

SCF Energy= -1953.43608789 Predicted Change= -1.389398D-04

---

Optimization completed. {Found 1 times}

| Item  | Max Val. | Criteria | Pass?   | RMS Val. | Criteria | Pass?   |
|-------|----------|----------|---------|----------|----------|---------|
| Force | 0.00023  | 0.00045  | [ YES ] | 0.00004  | 0.00030  | [ YES ] |
| Displ | 0.31456  | 0.00180  | [ NO ]  | 0.31456  | 0.00180  | [ NO ]  |

---

| Atomic Type | Coordinates (Angstroms) |   |   |
|-------------|-------------------------|---|---|
|             | X                       | Y | Z |

|   |           |          |          |
|---|-----------|----------|----------|
| C | -3.813666 | 3.314628 | 0.586672 |
| H | -4.778338 | 3.807123 | 0.674528 |

|    |           |           |           |
|----|-----------|-----------|-----------|
| C  | -2.631303 | 4.039353  | 0.720968  |
| H  | -2.653768 | 5.107497  | 0.918400  |
| C  | -1.411863 | 3.377953  | 0.605051  |
| H  | -0.502952 | 3.955218  | 0.727217  |
| C  | -1.332709 | 1.995536  | 0.346717  |
| P  | 0.329222  | 1.195264  | 0.191228  |
| Pd | 0.111848  | -1.119842 | -0.082515 |
| C  | 1.221817  | 1.827943  | 1.722891  |
| H  | 0.974329  | 2.896766  | 1.791298  |
| C  | 1.192964  | 2.021279  | -1.263541 |
| H  | 2.170318  | 1.517529  | -1.259553 |
| C  | -2.527808 | 1.255068  | 0.230177  |
| C  | -2.651798 | -0.234801 | 0.026344  |
| C  | -3.750928 | 1.943812  | 0.351557  |
| H  | -4.673600 | 1.376024  | 0.266733  |
| C  | -2.828343 | -1.077587 | 1.162036  |
| N  | -2.557204 | -0.563039 | 2.479864  |
| C  | -3.739596 | -0.034235 | 3.163001  |
| H  | -4.214240 | 0.741847  | 2.560130  |
| H  | -3.429899 | 0.415655  | 4.113091  |
| H  | -4.489802 | -0.816223 | 3.382430  |
| C  | -1.833161 | -1.495831 | 3.346696  |
| H  | -0.999701 | -1.939226 | 2.796477  |
| H  | -2.461320 | -2.312287 | 3.745273  |
| H  | -1.434719 | -0.939557 | 4.202942  |
| C  | -3.259234 | -2.397620 | 0.987606  |
| H  | -3.380127 | -3.039739 | 1.853346  |
| C  | -3.512992 | -2.900689 | -0.282553 |
| H  | -3.838168 | -3.929515 | -0.403811 |
| C  | -3.331097 | -2.094478 | -1.401034 |
| H  | -3.507436 | -2.505175 | -2.389128 |
| C  | -2.902672 | -0.768934 | -1.270950 |
| N  | -2.691861 | 0.049931  | -2.434251 |
| C  | -2.090666 | -0.659491 | -3.565181 |
| H  | -1.706972 | 0.080330  | -4.277317 |
| H  | -2.799547 | -1.306951 | -4.111559 |
| H  | -1.259246 | -1.276494 | -3.215320 |
| C  | -3.872196 | 0.799803  | -2.869127 |
| H  | -4.255654 | 1.418655  | -2.057047 |
| H  | -4.686462 | 0.141805  | -3.224880 |
| H  | -3.586631 | 1.462491  | -3.694008 |
| C  | 0.675944  | 1.136075  | 2.989181  |
| H  | 0.906611  | 0.063943  | 2.930683  |
| H  | -0.415976 | 1.214179  | 3.029035  |
| C  | 1.311335  | 1.724636  | 4.259831  |
| H  | 0.929470  | 1.195593  | 5.142560  |

|    |           |           |           |
|----|-----------|-----------|-----------|
| H  | 1.002553  | 2.775144  | 4.368497  |
| C  | 2.844231  | 1.646003  | 4.211739  |
| H  | 3.152023  | 0.590423  | 4.233193  |
| H  | 3.279281  | 2.117731  | 5.102054  |
| C  | 3.394197  | 2.304436  | 2.937998  |
| H  | 4.484347  | 2.188873  | 2.889284  |
| H  | 3.196000  | 3.386509  | 2.974159  |
| C  | 2.759562  | 1.711102  | 1.666333  |
| H  | 3.048443  | 0.658958  | 1.572628  |
| H  | 3.162126  | 2.225111  | 0.786311  |
| C  | 0.497004  | 1.665124  | -2.593369 |
| H  | -0.502944 | 2.117393  | -2.614310 |
| H  | 0.341609  | 0.583617  | -2.655832 |
| C  | 1.320085  | 2.152324  | -3.798264 |
| H  | 0.785341  | 1.920596  | -4.728452 |
| H  | 2.267154  | 1.594225  | -3.835702 |
| C  | 1.622911  | 3.655691  | -3.717956 |
| H  | 0.684322  | 4.220769  | -3.817453 |
| H  | 2.262800  | 3.961326  | -4.555391 |
| C  | 2.286305  | 4.016877  | -2.381127 |
| H  | 2.443685  | 5.101027  | -2.312643 |
| H  | 3.281174  | 3.551323  | -2.326627 |
| C  | 1.435353  | 3.542752  | -1.188342 |
| H  | 0.472402  | 4.067221  | -1.221664 |
| H  | 1.924405  | 3.826185  | -0.248872 |
| C  | 2.848013  | -1.807505 | 0.816734  |
| H  | 2.372064  | -2.008520 | 1.771270  |
| C  | 2.093742  | -1.362454 | -0.273185 |
| C  | 2.726958  | -1.154129 | -1.500072 |
| H  | 2.160168  | -0.846079 | -2.372993 |
| C  | 4.105405  | -1.365668 | -1.624038 |
| H  | 4.580638  | -1.198129 | -2.589163 |
| C  | 4.877990  | -1.797117 | -0.540493 |
| C  | 6.359057  | -2.061008 | -0.691429 |
| H  | 6.898373  | -1.876840 | 0.244479  |
| H  | 6.803412  | -1.426854 | -1.466684 |
| H  | 6.552136  | -3.104282 | -0.975995 |
| C  | 4.224010  | -2.013909 | 0.679451  |
| H  | 4.794766  | -2.360695 | 1.539232  |
| Br | -0.072384 | -3.647103 | -0.392994 |

---

Statistical Thermodynamic Analysis

Temperature= 298.150 Kelvin      Pressure= 1.00000 Atm

---

SCF Energy= -1953.43608789      Predicted Change= -1.389398D-04

Zero-point correction (ZPE)= -1952.6725      0.76353

Internal Energy (U)= -1952.6298 0.80623  
 Enthalpy (H)= -1952.6289 0.80718  
 Gibbs Free Energy (G)= -1952.7513 0.68471

---

Frequencies -- 11.8890 18.5342 23.4070  
 $\Delta G_{\text{Solvation}} = -0.0167777399999522$

**TS-IV- $\alpha$ -4-mem Transmetalation:**

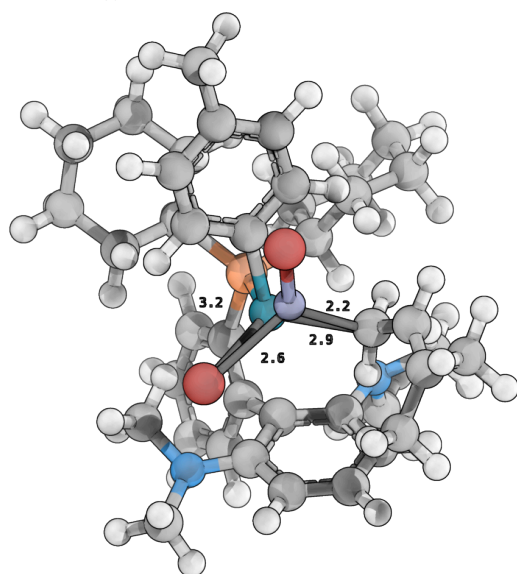


---

Using Gaussian 03: EM64L-G03RevE.01 11-Sep-2007

```
# b3lyp/gen pseudo=read gfpint gfinput
scf=(direct,tight,maxcycle=300,xqc)
opt=(maxcycle=250,calcf,ts,noeigentest,gdiis) iop(1/8=18) freq=noraman
#N Geom=AllCheck Guess=Read SCRF=Check Test GenChk RB3LYP/ChkBas Freq

Pointgroup= C1 Stoichiometry= C40H57Br2N2PPdZn C1[X(C40H57Br2N2PPdZn)]
#Atoms= 104
Charge = 0 Multiplicity = 1
```

---

SCF Energy= -2228.17945412 Predicted Change= -7.865138D-09

Optimization completed. {Found 1 times}

| Item  | Max Val. | Criteria | Pass?   | RMS Val. | Criteria | Pass?   |
|-------|----------|----------|---------|----------|----------|---------|
| Force | 0.00002  | 0.00045  | [ YES ] | 0.00000  | 0.00030  | [ YES ] |
| Displ | 0.00311  | 0.00180  | [ NO ]  | 0.00311  | 0.00180  | [ YES ] |

---

| Atomic Type | Coordinates (Angstroms) |   |   |
|-------------|-------------------------|---|---|
|             | X                       | Y | Z |

---

|   |          |           |           |
|---|----------|-----------|-----------|
| C | 5.004554 | -2.651548 | -1.665480 |
|---|----------|-----------|-----------|

|    |           |           |           |
|----|-----------|-----------|-----------|
| H  | 5.643498  | -3.418568 | -2.094586 |
| C  | 5.464856  | -1.343193 | -1.522539 |
| H  | 6.467381  | -1.069806 | -1.839555 |
| C  | 4.621010  | -0.378701 | -0.978227 |
| H  | 4.992821  | 0.636124  | -0.897370 |
| C  | 3.311318  | -0.686255 | -0.561371 |
| P  | 2.203857  | 0.644041  | 0.112177  |
| Pd | -0.012339 | -0.172776 | -0.058016 |
| C  | 2.876710  | 0.894170  | 1.866718  |
| H  | 2.980571  | -0.148702 | 2.191381  |
| C  | 2.715941  | 2.162949  | -0.883413 |
| H  | 3.807934  | 2.222240  | -0.777272 |
| C  | 2.847028  | -2.012796 | -0.694003 |
| C  | 1.492355  | -2.535099 | -0.278807 |
| C  | 3.714721  | -2.971753 | -1.253164 |
| H  | 3.353439  | -3.989322 | -1.366254 |
| C  | 1.272997  | -2.892095 | 1.096041  |
| N  | 2.161988  | -2.398831 | 2.112864  |
| C  | 1.545653  | -2.203537 | 3.425976  |
| H  | 2.224921  | -1.606426 | 4.044446  |
| H  | 0.600586  | -1.665355 | 3.323277  |
| H  | 1.354978  | -3.145207 | 3.969231  |
| C  | 3.395782  | -3.184146 | 2.255192  |
| H  | 3.199914  | -4.190103 | 2.666186  |
| H  | 3.899003  | -3.293182 | 1.294660  |
| H  | 4.073563  | -2.660644 | 2.939207  |
| C  | 0.238889  | -3.760644 | 1.445479  |
| H  | 0.073171  | -4.021941 | 2.483431  |
| C  | -0.564884 | -4.327281 | 0.454762  |
| H  | -1.367274 | -5.003586 | 0.736822  |
| C  | -0.368429 | -4.029176 | -0.880658 |
| H  | -1.037602 | -4.446680 | -1.620195 |
| C  | 0.665926  | -3.154985 | -1.287988 |
| N  | 0.914178  | -2.987244 | -2.639288 |
| C  | 1.319579  | -1.708669 | -3.217864 |
| H  | 0.613814  | -1.434390 | -4.009740 |
| H  | 1.273336  | -0.919252 | -2.470173 |
| H  | 2.333388  | -1.752923 | -3.637690 |
| C  | 0.290244  | -3.883253 | -3.605084 |
| H  | 0.352440  | -4.920609 | -3.264630 |
| H  | -0.761451 | -3.626489 | -3.798398 |
| H  | 0.842574  | -3.807444 | -4.546954 |
| C  | 1.874103  | 1.579148  | 2.817892  |
| H  | 1.641543  | 2.591820  | 2.466020  |
| H  | 0.931434  | 1.022062  | 2.810972  |
| C  | 2.417604  | 1.660174  | 4.255693  |

|    |           |           |           |
|----|-----------|-----------|-----------|
| H  | 1.699353  | 2.198578  | 4.886798  |
| H  | 2.497056  | 0.645358  | 4.671454  |
| C  | 3.795265  | 2.332840  | 4.313810  |
| H  | 3.702061  | 3.385863  | 4.009545  |
| H  | 4.173749  | 2.337496  | 5.343585  |
| C  | 4.786402  | 1.621347  | 3.384203  |
| H  | 5.761370  | 2.124830  | 3.401487  |
| H  | 4.956405  | 0.597260  | 3.747639  |
| C  | 4.265985  | 1.565007  | 1.935794  |
| H  | 4.213488  | 2.589203  | 1.543764  |
| H  | 4.985309  | 1.019607  | 1.316093  |
| C  | 2.148679  | 3.498815  | -0.353906 |
| H  | 1.057136  | 3.485578  | -0.398375 |
| H  | 2.422690  | 3.645037  | 0.696189  |
| C  | 2.674569  | 4.682338  | -1.186335 |
| H  | 2.239547  | 5.614248  | -0.804346 |
| H  | 3.764208  | 4.768750  | -1.056513 |
| C  | 2.351658  | 4.512031  | -2.676829 |
| H  | 1.261264  | 4.533815  | -2.812749 |
| H  | 2.759708  | 5.351075  | -3.254284 |
| C  | 2.903140  | 3.182070  | -3.208538 |
| H  | 2.623682  | 3.043186  | -4.260407 |
| H  | 4.002928  | 3.205954  | -3.177988 |
| C  | 2.398490  | 1.985002  | -2.383810 |
| H  | 1.314215  | 1.886664  | -2.510094 |
| H  | 2.850626  | 1.061220  | -2.761835 |
| C  | -1.090620 | 2.423140  | 1.096022  |
| H  | -0.865766 | 2.007538  | 2.071330  |
| C  | -0.841791 | 1.687289  | -0.072504 |
| C  | -1.169581 | 2.263101  | -1.311207 |
| H  | -1.023143 | 1.708091  | -2.230935 |
| C  | -1.741393 | 3.537991  | -1.367538 |
| H  | -2.010628 | 3.949817  | -2.337713 |
| C  | -2.002247 | 4.274886  | -0.206648 |
| C  | -2.685689 | 5.619156  | -0.272831 |
| H  | -2.405910 | 6.256854  | 0.572749  |
| H  | -2.441218 | 6.151204  | -1.198587 |
| H  | -3.775776 | 5.494136  | -0.244507 |
| C  | -1.664248 | 3.694948  | 1.022757  |
| H  | -1.869629 | 4.234658  | 1.944913  |
| Br | -2.119411 | -1.081046 | -2.219722 |
| C  | -2.141770 | -1.047271 | 1.713501  |
| H  | -1.435636 | -0.488781 | 2.330762  |
| H  | -1.713519 | -1.995667 | 1.392084  |
| C  | -3.466033 | -1.159009 | 2.364070  |
| H  | -3.721739 | -0.331591 | 3.027147  |

|    |           |           |           |
|----|-----------|-----------|-----------|
| C  | -4.414584 | -2.113481 | 2.200995  |
| C  | -4.277025 | -3.285837 | 1.265040  |
| H  | -5.087924 | -3.281419 | 0.522369  |
| H  | -4.362103 | -4.239213 | 1.808461  |
| H  | -3.332492 | -3.288165 | 0.715609  |
| C  | -5.722264 | -2.034039 | 2.945336  |
| H  | -6.565629 | -1.931399 | 2.246983  |
| H  | -5.751226 | -1.179966 | 3.629221  |
| H  | -5.908301 | -2.947890 | 3.529380  |
| Br | -4.970761 | 1.386250  | -0.070632 |
| Zn | -2.894431 | 0.048737  | -0.002394 |

---

Statistical Thermodynamic Analysis

Temperature= 298.150 Kelvin      Pressure= 1.00000 Atm

---

SCF Energy= -2228.17945412      Predicted Change= -7.865138D-09  
Zero-point correction (ZPE)= -2227.2867 0.89270  
Internal Energy (U)= -2227.2328 0.94656  
Enthalpy (H)= -2227.2319 0.94750  
Gibbs Free Energy (G)= -2227.3781 0.80131

---

Frequencies -- -68.2928                      17.3940                      18.2056  
 $\Delta G_{\text{Solvation}} = -0.0281542599996101$

**V Aryl Prenyl Intermediate:**

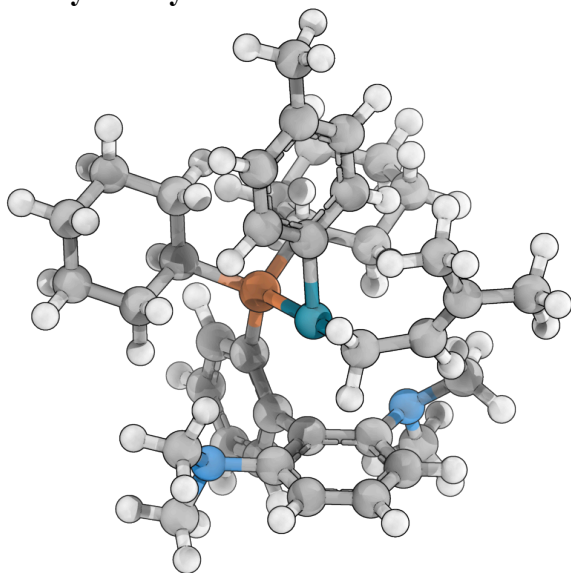


---

Using Gaussian 03: EM64L-G03RevE.01 11-Sep-2007

---

```
# b3lyp/gen pseudo=read gfpnt gfinput
scf=(direct,tight,maxcycle=300,xqc) opt=(maxcycle=250) freq=noraman
#N Geom=AllCheck Guess=Read SCRF=Check GenChk RB3LYP/ChkBas Freq
```

Pointgroup= C1 Stoichiometry= C40H57N2PPd C1[X(C40H57N2PPd)] #Atoms= 101

Charge = 0 Multiplicity = 1

SCF Energy= -2136.14026159 Predicted Change= -1.724614D-05

Optimization completed. {Found 1 times}

| Item  | Max Val. | Criteria | Pass?   | RMS Val. | Criteria | Pass?   |
|-------|----------|----------|---------|----------|----------|---------|
| Force | 0.00032  | 0.00045  | [ YES ] | 0.00002  | 0.00030  | [ YES ] |
| Displ | 0.13319  | 0.00180  | [ NO ]  | 0.13319  | 0.00180  | [ NO ]  |

Atomic Coordinates (Angstroms)

| Type | X | Y | Z |
|------|---|---|---|
|------|---|---|---|

|    |           |           |           |
|----|-----------|-----------|-----------|
| C  | -5.167027 | -1.217492 | 0.668217  |
| H  | -6.251647 | -1.212013 | 0.736225  |
| C  | -4.437351 | -2.349445 | 1.023268  |
| H  | -4.940064 | -3.247060 | 1.373192  |
| C  | -3.048787 | -2.323834 | 0.919639  |
| H  | -2.500003 | -3.219344 | 1.186814  |
| C  | -2.346624 | -1.186716 | 0.476197  |
| P  | -0.491932 | -1.238203 | 0.348126  |
| Pd | 0.585477  | 0.763429  | -0.577697 |
| C  | 0.154299  | -1.564509 | 2.091609  |
| H  | 1.227440  | -1.708478 | 1.896679  |
| C  | -0.220537 | -2.875241 | -0.552207 |
| H  | -0.896626 | -3.616626 | -0.103844 |
| C  | -3.088326 | -0.042875 | 0.103395  |
| C  | -2.533131 | 1.246517  | -0.448596 |
| C  | -4.491763 | -0.088447 | 0.211738  |
| H  | -5.062475 | 0.789662  | -0.079256 |
| C  | -2.280638 | 2.358128  | 0.402709  |
| N  | -2.308340 | 2.189177  | 1.829102  |
| C  | -3.631366 | 2.353904  | 2.434929  |
| H  | -3.573646 | 2.077194  | 3.493689  |
| H  | -3.998645 | 3.395027  | 2.371878  |
| H  | -4.358173 | 1.698483  | 1.954770  |
| C  | -1.310132 | 2.969081  | 2.558497  |
| H  | -0.334710 | 2.870424  | 2.075916  |
| H  | -1.556401 | 4.043343  | 2.641865  |
| H  | -1.234339 | 2.571635  | 3.576845  |
| C  | -2.002047 | 3.612203  | -0.161598 |
| H  | -1.816928 | 4.460687  | 0.488498  |
| C  | -1.970850 | 3.786465  | -1.542034 |
| H  | -1.765402 | 4.767980  | -1.960695 |



|   |           |           |           |
|---|-----------|-----------|-----------|
| C | -2.202008 | 2.702606  | -2.383059 |
| H | -2.167450 | 2.837602  | -3.459417 |
| C | -2.474931 | 1.433356  | -1.855707 |
| N | -2.694877 | 0.310214  | -2.729460 |
| C | -4.072444 | 0.199109  | -3.210918 |
| H | -4.359275 | 1.027788  | -3.885018 |
| H | -4.182382 | -0.741569 | -3.762318 |
| H | -4.767613 | 0.180841  | -2.369598 |
| C | -1.742092 | 0.216545  | -3.835079 |
| H | -0.725043 | 0.329830  | -3.450172 |
| H | -1.832850 | -0.775583 | -4.291450 |
| H | -1.904626 | 0.964227  | -4.632801 |
| C | -0.363884 | -2.801190 | 2.850713  |
| H | -1.433673 | -2.677298 | 3.061852  |
| H | -0.259603 | -3.709978 | 2.244931  |
| C | 0.380633  | -2.981234 | 4.186579  |
| H | -0.012720 | -3.860016 | 4.714101  |
| H | 1.442682  | -3.185032 | 3.986008  |
| C | 0.258351  | -1.729663 | 5.067122  |
| H | -0.794123 | -1.596796 | 5.359163  |
| H | 0.827067  | -1.860185 | 5.996768  |
| C | 0.738214  | -0.478091 | 4.317867  |
| H | 0.589099  | 0.416781  | 4.936354  |
| H | 1.820991  | -0.557224 | 4.140355  |
| C | 0.020209  | -0.303557 | 2.968520  |
| H | -1.042961 | -0.084515 | 3.134174  |
| H | 0.432154  | 0.558739  | 2.432602  |
| C | 1.220441  | -3.412190 | -0.420920 |
| H | 1.926823  | -2.669179 | -0.808676 |
| H | 1.481841  | -3.574609 | 0.630839  |
| C | 1.391672  | -4.734837 | -1.190373 |
| H | 2.431704  | -5.074762 | -1.105097 |
| H | 0.769208  | -5.512103 | -0.721195 |
| C | 0.995354  | -4.594022 | -2.666499 |
| H | 1.694693  | -3.905471 | -3.162833 |
| H | 1.087236  | -5.559931 | -3.179969 |
| C | -0.432771 | -4.047400 | -2.803730 |
| H | -0.685463 | -3.899424 | -3.862004 |
| H | -1.145987 | -4.789500 | -2.414236 |
| C | -0.604475 | -2.724405 | -2.038879 |
| H | 0.040664  | -1.957544 | -2.488644 |
| H | -1.632884 | -2.356984 | -2.130859 |
| C | 3.231954  | 0.166220  | 0.654345  |
| H | 2.796100  | 0.606250  | 1.547599  |
| C | 2.500596  | 0.129302  | -0.540544 |
| C | 3.126790  | -0.407921 | -1.675312 |

|   |          |           |           |
|---|----------|-----------|-----------|
| H | 2.601664 | -0.440031 | -2.626787 |
| C | 4.429237 | -0.915044 | -1.605665 |
| H | 4.886869 | -1.330163 | -2.502953 |
| C | 5.156898 | -0.894998 | -0.408969 |
| C | 6.576736 | -1.411862 | -0.346737 |
| H | 6.732692 | -2.245031 | -1.041618 |
| H | 7.303153 | -0.631073 | -0.611937 |
| H | 6.832939 | -1.761762 | 0.659678  |
| C | 4.532905 | -0.345991 | 0.718085  |
| H | 5.073029 | -0.310872 | 1.663559  |
| C | 1.427128 | 2.526881  | -1.362217 |
| C | 1.821678 | 3.482583  | -0.308813 |
| H | 0.987066 | 3.905246  | 0.255144  |
| C | 3.055879 | 3.897784  | 0.054986  |
| C | 4.335033 | 3.450900  | -0.606064 |
| H | 4.976535 | 2.909735  | 0.103797  |
| H | 4.164400 | 2.787170  | -1.456210 |
| H | 4.916320 | 4.317194  | -0.956883 |
| C | 3.238837 | 4.882764  | 1.184539  |
| H | 3.860506 | 4.462670  | 1.990080  |
| H | 3.756180 | 5.793063  | 0.844774  |
| H | 2.281269 | 5.184881  | 1.623475  |
| H | 2.212398 | 2.309848  | -2.087573 |
| H | 0.522577 | 2.863117  | -1.889086 |

---

Statistical Thermodynamic Analysis

Temperature= 298.150 Kelvin      Pressure= 1.00000 Atm

---

SCF Energy= -2136.14026159      Predicted Change= -1.724614D-05  
Zero-point correction (ZPE)= -2135.2517 0.88846  
Internal Energy (U)= -2135.2034 0.93680  
Enthalpy (H)= -2135.2025 0.93775  
Gibbs Free Energy (G)= -2135.3385 0.80171

---

Frequencies -- 8.3086                      18.6557                      21.1872  
 $\Delta G_{\text{Solvation}} = -0.00806345000000874$

**TS-VI- $\eta^1$ - $\alpha$  Reductive Elimination:**

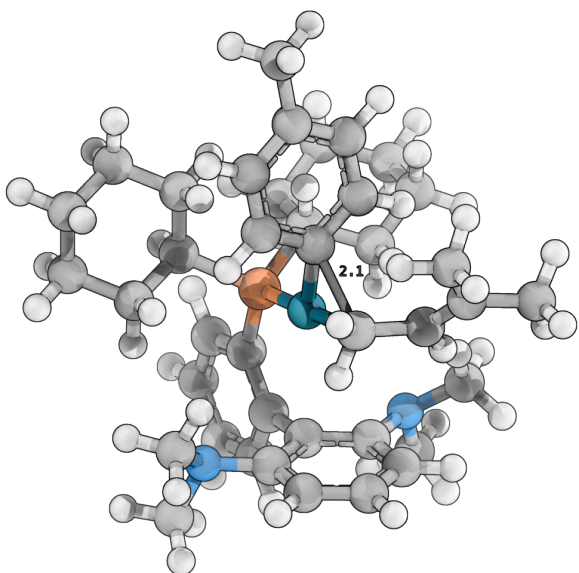


---

Using Gaussian 03: EM64L-G03RevE.01 11-Sep-2007

---

```
# b3lyp/gen pseudo=read gfprint ginput
scf=(direct,tight,maxcycle=300,xqc)
opt=(maxcycle=250,calcfc,ts,noeigentest) freq=noraman
#N Geom=AllCheck Guess=Read SCRF=Check GenChk RB3LYP/ChkBas Freq
```

---

```
Pointgroup= C1  Stoichiometry= C40H57N2PPd  C1[X(C40H57N2PPd)]
#Atoms= 101
Charge = 0 Multiplicity = 1
```

---

```
SCF Energy= -2136.12385141  Predicted Change= -9.024289D-10
```

---

Optimization completed on the basis of negligible forces. {Found 2 times}

| Item  | Max Val. | Criteria | Pass?   | RMS Val. | Criteria | Pass?   |
|-------|----------|----------|---------|----------|----------|---------|
| Force | 0.00000  | 0.00045  | [ YES ] | 0.00000  | 0.00030  | [ YES ] |
| Displ | 0.00246  | 0.00180  | [ NO ]  | 0.00246  | 0.00180  | [ YES ] |

---

| Atomic Type | Coordinates (Angstroms) |   |   |
|-------------|-------------------------|---|---|
|             | X                       | Y | Z |

---

|    |           |           |           |
|----|-----------|-----------|-----------|
| C  | 5.394518  | 0.744090  | 0.160557  |
| H  | 6.476648  | 0.659059  | 0.105930  |
| C  | 4.793472  | 1.915501  | 0.612632  |
| H  | 5.395440  | 2.767327  | 0.917868  |
| C  | 3.403416  | 1.990837  | 0.665757  |
| H  | 2.960196  | 2.918580  | 1.007247  |
| C  | 2.569888  | 0.920613  | 0.286226  |
| P  | 0.715854  | 1.139926  | 0.386585  |
| Pd | -0.799548 | -0.468409 | -0.478624 |

|   |           |           |           |
|---|-----------|-----------|-----------|
| C | 0.497302  | 2.850464  | -0.382306 |
| H | 1.211558  | 3.535884  | 0.094483  |
| C | 0.334107  | 1.430498  | 2.218313  |
| H | -0.728818 | 1.711161  | 2.175527  |
| C | 3.183584  | -0.264581 | -0.188366 |
| C | 2.463824  | -1.483551 | -0.703454 |
| C | 4.589506  | -0.320421 | -0.236438 |
| H | 5.057280  | -1.228212 | -0.608812 |
| C | 2.163219  | -1.584045 | -2.084920 |
| N | 2.429860  | -0.468722 | -2.952764 |
| C | 1.405376  | -0.218714 | -3.963424 |
| H | 1.563522  | 0.782150  | -4.381162 |
| H | 0.416621  | -0.246935 | -3.498045 |
| H | 1.421961  | -0.934134 | -4.806616 |
| C | 3.762558  | -0.485415 | -3.555713 |
| H | 4.529158  | -0.575188 | -2.784861 |
| H | 3.926086  | 0.458764  | -4.087831 |
| H | 3.893032  | -1.313409 | -4.277544 |
| C | 1.574758  | -2.751915 | -2.590293 |
| H | 1.343781  | -2.821533 | -3.648282 |
| C | 1.277888  | -3.817782 | -1.747267 |
| H | 0.824163  | -4.720542 | -2.148023 |
| C | 1.580396  | -3.734846 | -0.391517 |
| H | 1.357463  | -4.575391 | 0.256784  |
| C | 2.172674  | -2.582003 | 0.146147  |
| N | 2.447521  | -2.496244 | 1.552938  |
| C | 3.822633  | -2.829685 | 1.929382  |
| H | 3.966218  | -2.602024 | 2.991757  |
| H | 4.533662  | -2.232848 | 1.358883  |
| H | 4.054908  | -3.899563 | 1.772993  |
| C | 1.501525  | -3.200066 | 2.414165  |
| H | 0.477995  | -2.969170 | 2.109798  |
| H | 1.641744  | -2.852385 | 3.443910  |
| H | 1.630422  | -4.298112 | 2.417310  |
| C | 0.818814  | 2.804017  | -1.890187 |
| H | 0.133429  | 2.093557  | -2.371553 |
| H | 1.830762  | 2.416697  | -2.053341 |
| C | 0.661114  | 4.186931  | -2.542645 |
| H | 0.870777  | 4.116080  | -3.618211 |
| H | 1.410470  | 4.875832  | -2.124280 |
| C | -0.743442 | 4.761739  | -2.308999 |
| H | -1.481270 | 4.133908  | -2.829904 |
| H | -0.823701 | 5.766954  | -2.743014 |
| C | -1.082311 | 4.798270  | -0.811897 |
| H | -2.108565 | 5.157186  | -0.661398 |
| H | -0.421535 | 5.521458  | -0.310030 |

|   |           |           |           |
|---|-----------|-----------|-----------|
| C | -0.919846 | 3.416835  | -0.152390 |
| H | -1.663068 | 2.722105  | -0.563659 |
| H | -1.132015 | 3.503812  | 0.919549  |
| C | 0.417477  | 0.112236  | 3.012066  |
| H | 1.457474  | -0.239819 | 3.026790  |
| H | -0.164728 | -0.657881 | 2.493261  |
| C | -0.100009 | 0.284703  | 4.450468  |
| H | 0.013178  | -0.658317 | 5.001709  |
| H | -1.178404 | 0.500373  | 4.420267  |
| C | 0.620088  | 1.422661  | 5.188097  |
| H | 1.676485  | 1.151019  | 5.332389  |
| H | 0.192593  | 1.560682  | 6.189707  |
| C | 0.542873  | 2.731696  | 4.389665  |
| H | 1.102375  | 3.525628  | 4.901695  |
| H | -0.503464 | 3.067765  | 4.340301  |
| C | 1.087227  | 2.550984  | 2.960676  |
| H | 2.152913  | 2.297005  | 3.022254  |
| H | 1.014155  | 3.501960  | 2.418044  |
| C | -3.354007 | 0.616407  | -1.595613 |
| H | -2.849022 | 0.637631  | -2.558579 |
| C | -2.851032 | -0.193620 | -0.557769 |
| C | -3.566813 | -0.229144 | 0.648178  |
| H | -3.244555 | -0.890811 | 1.447019  |
| C | -4.702220 | 0.566815  | 0.831212  |
| H | -5.224850 | 0.533090  | 1.786278  |
| C | -5.187414 | 1.396754  | -0.185966 |
| C | -6.437826 | 2.225244  | 0.001236  |
| H | -6.319616 | 3.234992  | -0.410488 |
| H | -6.695340 | 2.324759  | 1.061340  |
| H | -7.303716 | 1.774191  | -0.503232 |
| C | -4.490432 | 1.401943  | -1.404517 |
| H | -4.846695 | 2.027956  | -2.221750 |
| C | -2.183288 | -2.055871 | -1.188354 |
| C | -2.422451 | -3.075157 | -0.145330 |
| H | -1.529377 | -3.395855 | 0.390894  |
| C | -3.592678 | -3.641636 | 0.216221  |
| C | -4.926719 | -3.320853 | -0.409302 |
| H | -5.627082 | -2.938719 | 0.346369  |
| H | -5.386215 | -4.226907 | -0.830985 |
| H | -4.861183 | -2.570521 | -1.199854 |
| C | -3.639033 | -4.687405 | 1.304100  |
| H | -4.301243 | -4.378967 | 2.126446  |
| H | -2.647355 | -4.884563 | 1.725001  |
| H | -4.042099 | -5.638615 | 0.926109  |
| H | -1.227487 | -2.249184 | -1.712841 |
| H | -2.957634 | -1.990442 | -1.947485 |

---

---

Statistical Thermodynamic Analysis

Temperature= 298.150 Kelvin      Pressure= 1.00000 Atm

---

---

SCF Energy= -2136.12385141      Predicted Change= -9.024289D-10  
Zero-point correction (ZPE)= -2135.2360      0.88782  
Internal Energy (U)= -2135.1882      0.93563  
Enthalpy (H)= -2135.1872      0.93657  
Gibbs Free Energy (G)= -2135.3218      0.80200

---

---

Frequencies -- -320.7174              9.9835              15.8974  
 $\Delta G_{\text{Solvation}} = -0.00681763000011415$

**VII Product-Catalyst Complex:**

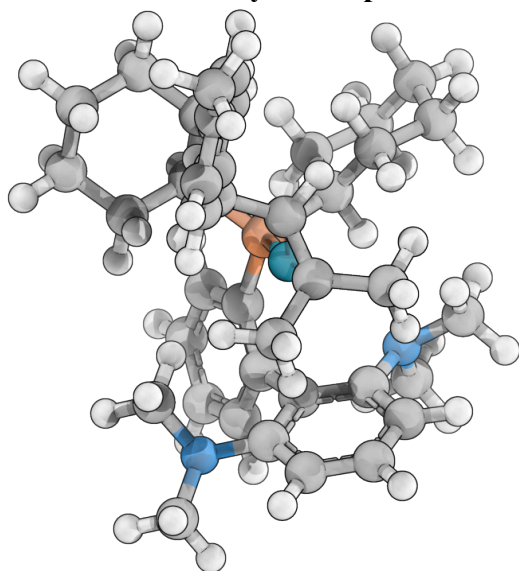

---

---

Using Gaussian 03: EM64L-G03RevE.01 11-Sep-2007

---

---

```
# b3lyp/gen pseudo=read gfprint ginput  
scf=(direct,tight,maxcycle=300,xqc) opt=(maxcycle=250,gdiis) iop(1/8=18)  
freq=noraman  
#N Geom=AllCheck Guess=Read SCRF=Check Test GenChk RB3LYP/ChkBas Freq
```

---

---

Pointgroup= C1    Stoichiometry= C40H57N2PPd    C1[X(C40H57N2PPd)]  
#Atoms= 101  
Charge = 0    Multiplicity = 1

---

---

SCF Energy= -2136.19510844    Predicted Change= -6.272816D-08

---

---

Optimization completed on the basis of negligible forces. {Found 2 times}

|       |          |          |         |          |          |         |
|-------|----------|----------|---------|----------|----------|---------|
| Item  | Max Val. | Criteria | Pass?   | RMS Val. | Criteria | Pass?   |
| Force | 0.00000  | 0.00045  | [ YES ] | 0.00000  | 0.00030  | [ YES ] |
| Displ | 0.05684  | 0.00180  | [ NO ]  | 0.05684  | 0.00180  | [ NO ]  |

---

| Atomic Type | Coordinates (Angstroms) |           |           |
|-------------|-------------------------|-----------|-----------|
|             | X                       | Y         | Z         |
| C           | -5.053959               | -0.757535 | 2.338863  |
| H           | -5.924155               | -1.183032 | 2.831773  |
| C           | -4.708723               | 0.578943  | 2.530895  |
| H           | -5.303879               | 1.219288  | 3.176804  |
| C           | -3.583198               | 1.090961  | 1.890974  |
| H           | -3.325149               | 2.127380  | 2.074711  |
| C           | -2.771954               | 0.312445  | 1.040399  |
| P           | -1.254329               | 1.086069  | 0.259561  |
| Pd          | 0.496482                | -0.302998 | -0.454501 |
| C           | -2.036899               | 2.176375  | -1.087267 |
| H           | -2.753169               | 1.473438  | -1.532905 |
| C           | -0.673888               | 2.283199  | 1.607077  |
| H           | -1.502508               | 2.951364  | 1.878545  |
| C           | -3.130379               | -1.046251 | 0.843158  |
| C           | -2.411597               | -2.049265 | -0.018407 |
| C           | -4.266109               | -1.548682 | 1.510111  |
| H           | -4.523654               | -2.593106 | 1.364116  |
| C           | -2.497346               | -2.007707 | -1.432484 |
| N           | -3.189704               | -0.930348 | -2.076995 |
| C           | -2.758025               | -0.630153 | -3.437862 |
| H           | -3.180512               | 0.336926  | -3.732066 |
| H           | -1.668187               | -0.557017 | -3.474446 |
| H           | -3.090515               | -1.372999 | -4.185807 |
| C           | -4.651015               | -1.024545 | -2.008178 |
| H           | -5.044858               | -1.852719 | -2.624918 |
| H           | -4.978799               | -1.170953 | -0.978710 |
| H           | -5.087139               | -0.088004 | -2.374358 |
| C           | -1.949319               | -3.049685 | -2.199288 |
| H           | -2.026561               | -3.022870 | -3.279999 |
| C           | -1.347477               | -4.140547 | -1.584271 |
| H           | -0.938246               | -4.946278 | -2.188696 |
| C           | -1.279144               | -4.211127 | -0.196741 |
| H           | -0.804445               | -5.065486 | 0.272588  |
| C           | -1.806390               | -3.181941 | 0.598563  |
| N           | -1.790997               | -3.292325 | 2.016825  |
| C           | -0.916975               | -2.369081 | 2.736241  |
| H           | 0.141761                | -2.681938 | 2.688422  |
| H           | -0.988632               | -1.368054 | 2.316111  |
| H           | -1.218189               | -2.328999 | 3.789892  |

|   |           |           |           |
|---|-----------|-----------|-----------|
| C | -1.726221 | -4.633697 | 2.573758  |
| H | -2.436930 | -5.289364 | 2.062587  |
| H | -0.722552 | -5.095476 | 2.518590  |
| H | -2.004161 | -4.583709 | 3.633010  |
| C | -1.020269 | 2.556480  | -2.187631 |
| H | -0.238798 | 3.206514  | -1.771784 |
| H | -0.507691 | 1.654614  | -2.540759 |
| C | -1.699781 | 3.287789  | -3.358575 |
| H | -0.945650 | 3.577517  | -4.102121 |
| H | -2.388641 | 2.597126  | -3.867177 |
| C | -2.484553 | 4.519502  | -2.885568 |
| H | -1.781968 | 5.265469  | -2.484568 |
| H | -2.996302 | 4.996144  | -3.731781 |
| C | -3.495408 | 4.140326  | -1.794723 |
| H | -4.020345 | 5.033473  | -1.430877 |
| H | -4.263343 | 3.480247  | -2.224999 |
| C | -2.817158 | 3.419362  | -0.614480 |
| H | -2.136952 | 4.125279  | -0.117776 |
| H | -3.578911 | 3.139153  | 0.120596  |
| C | 0.486521  | 3.169216  | 1.104230  |
| H | 1.297672  | 2.521566  | 0.745222  |
| H | 0.166378  | 3.770636  | 0.246534  |
| C | 1.012961  | 4.103512  | 2.207996  |
| H | 1.854197  | 4.692951  | 1.820475  |
| H | 0.226651  | 4.823949  | 2.479617  |
| C | 1.436510  | 3.324825  | 3.460415  |
| H | 2.299381  | 2.687676  | 3.216541  |
| H | 1.768582  | 4.015460  | 4.246330  |
| C | 0.287046  | 2.445191  | 3.970182  |
| H | 0.613175  | 1.851316  | 4.834059  |
| H | -0.532023 | 3.088379  | 4.325780  |
| C | -0.241539 | 1.508917  | 2.870300  |
| H | 0.544004  | 0.794095  | 2.586951  |
| H | -1.079679 | 0.920295  | 3.260027  |
| C | 5.759404  | -1.147256 | 0.449478  |
| H | 5.266253  | -2.035283 | 0.838276  |
| C | 5.007096  | 0.011871  | 0.217040  |
| C | 3.505980  | 0.045295  | 0.468471  |
| C | 2.713006  | -0.268992 | -0.793190 |
| H | 2.823206  | 0.484820  | -1.574143 |
| C | 2.253692  | -1.518100 | -1.196472 |
| C | 2.397062  | -2.775093 | -0.362067 |
| H | 3.276775  | -3.352979 | -0.688397 |
| H | 1.521489  | -3.422009 | -0.485299 |
| H | 2.509450  | -2.567837 | 0.705349  |
| C | 1.987731  | -1.786996 | -2.667595 |



|   |          |           |           |
|---|----------|-----------|-----------|
| H | 2.817695 | -2.367633 | -3.102430 |
| H | 1.893568 | -0.857677 | -3.238702 |
| H | 1.073266 | -2.374129 | -2.812368 |
| H | 3.226741 | 1.044099  | 0.824751  |
| H | 3.252227 | -0.653702 | 1.270989  |
| C | 5.678707 | 1.135634  | -0.281466 |
| H | 5.121300 | 2.051637  | -0.468764 |
| C | 7.049249 | 1.101784  | -0.539766 |
| H | 7.543591 | 1.990823  | -0.926448 |
| C | 7.801819 | -0.055743 | -0.304035 |
| C | 9.293562 | -0.082791 | -0.547436 |
| H | 9.629253 | -1.073369 | -0.874211 |
| H | 9.588300 | 0.642662  | -1.313478 |
| H | 9.853445 | 0.163159  | 0.365335  |
| C | 7.129923 | -1.180232 | 0.193223  |
| H | 7.688165 | -2.094508 | 0.385617  |

---

Statistical Thermodynamic Analysis

Temperature= 298.150 Kelvin      Pressure= 1.00000 Atm

---

SCF Energy= -2136.19510844      Predicted Change= -6.272816D-08  
Zero-point correction (ZPE)= -2135.3035 0.89160  
Internal Energy (U)= -2135.2558 0.93923  
Enthalpy (H)= -2135.2549 0.94018  
Gibbs Free Energy (G)= -2135.3892 0.80588

---

Frequencies -- 9.6702              13.4988              15.3959  
 $\Delta G_{\text{Solvation}} = -0.00707439999996495$

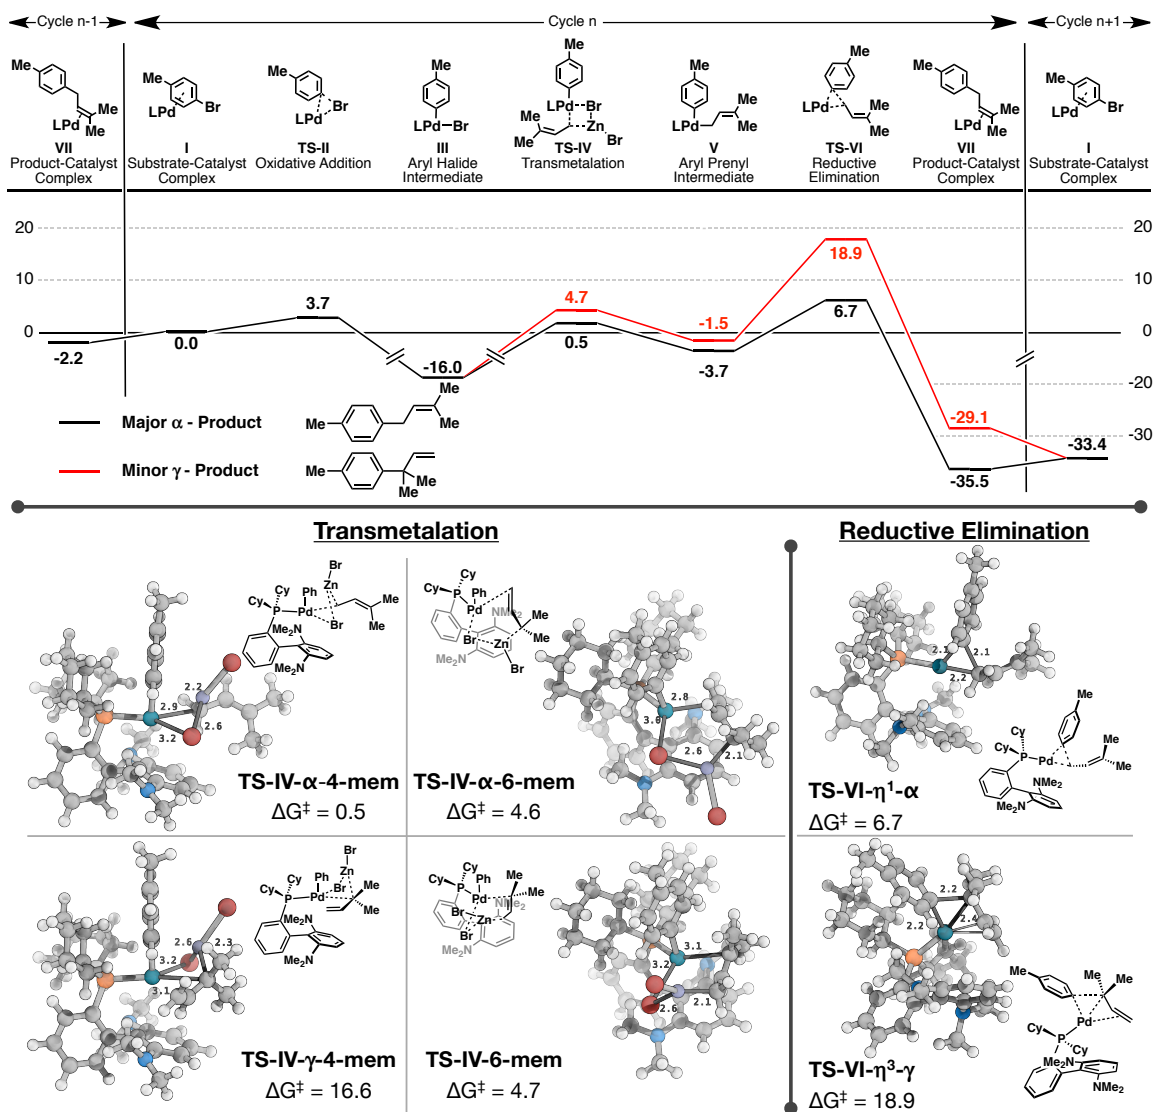

**Figure X.** Reaction coordinate of Pd(0)-catalyzed cross-coupling of prenylZnBr with p-bromotoluene (above) and transmetalation and reductive elimination transition (below).<sup>10</sup> Energies are displayed in kcal/mol and distances in Å. Computed structures are rendered in Pymol.<sup>11</sup>

TS-IV- $\alpha$ -4-mem:

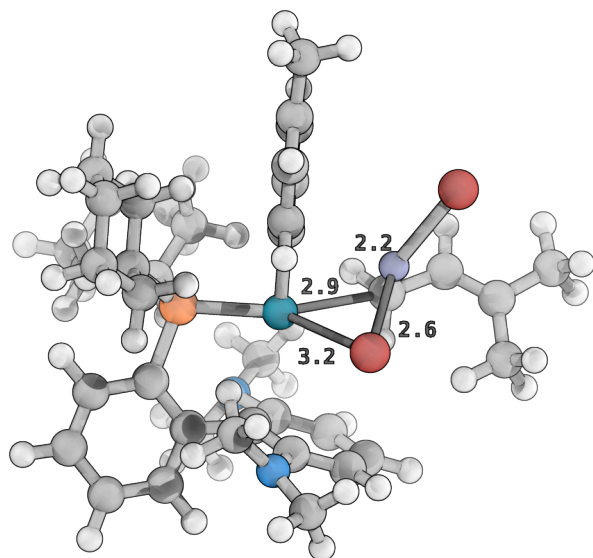

---

Using Gaussian 03: EM64L-G03RevE.01 11-Sep-2007

---

```
# b3lyp/gen pseudo=read gfpri nt gfinpu t  
scf=(direct,tight,maxcycle=300,xqc)  
opt=(maxcycle=250,calcf,ts,noeigentest,gdiis) iop(1/8=18) freq=norman  
#N Geom=AllCheck Guess=Read SCRF=Check Test GenChk RB3LYP/ChkBas Freq
```

---

```
Pointgroup= C1  Stoichiometry= C40H57Br2N2PPdZn  C1[X(C40H57Br2N2PPdZn)]  
#Atoms= 104  
Charge = 0 Multiplicity = 1
```

---

```
SCF Energy= -2228.17945412  Predicted Change= -7.865138D-09
```

---

Optimization completed. {Found 1 times}

| Item  | Max Val. | Criteria | Pass?   | RMS Val. | Criteria | Pass?   |
|-------|----------|----------|---------|----------|----------|---------|
| Force | 0.00002  | 0.00045  | [ YES ] | 0.00000  | 0.00030  | [ YES ] |
| Displ | 0.00311  | 0.00180  | [ NO ]  | 0.00311  | 0.00180  | [ YES ] |

---

| Atomic Type | Coordinates (Angstroms) |   |   |
|-------------|-------------------------|---|---|
|             | X                       | Y | Z |

---

|   |          |           |           |
|---|----------|-----------|-----------|
| C | 5.004554 | -2.651548 | -1.665480 |
| H | 5.643498 | -3.418568 | -2.094586 |
| C | 5.464856 | -1.343193 | -1.522539 |
| H | 6.467381 | -1.069806 | -1.839555 |
| C | 4.621010 | -0.378701 | -0.978227 |
| H | 4.992821 | 0.636124  | -0.897370 |
| C | 3.311318 | -0.686255 | -0.561371 |
| P | 2.203857 | 0.644041  | 0.112177  |

|    |           |           |           |
|----|-----------|-----------|-----------|
| Pd | -0.012339 | -0.172776 | -0.058016 |
| C  | 2.876710  | 0.894170  | 1.866718  |
| H  | 2.980571  | -0.148702 | 2.191381  |
| C  | 2.715941  | 2.162949  | -0.883413 |
| H  | 3.807934  | 2.222240  | -0.777272 |
| C  | 2.847028  | -2.012796 | -0.694003 |
| C  | 1.492355  | -2.535099 | -0.278807 |
| C  | 3.714721  | -2.971753 | -1.253164 |
| H  | 3.353439  | -3.989322 | -1.366254 |
| C  | 1.272997  | -2.892095 | 1.096041  |
| N  | 2.161988  | -2.398831 | 2.112864  |
| C  | 1.545653  | -2.203537 | 3.425976  |
| H  | 2.224921  | -1.606426 | 4.044446  |
| H  | 0.600586  | -1.665355 | 3.323277  |
| H  | 1.354978  | -3.145207 | 3.969231  |
| C  | 3.395782  | -3.184146 | 2.255192  |
| H  | 3.199914  | -4.190103 | 2.666186  |
| H  | 3.899003  | -3.293182 | 1.294660  |
| H  | 4.073563  | -2.660644 | 2.939207  |
| C  | 0.238889  | -3.760644 | 1.445479  |
| H  | 0.073171  | -4.021941 | 2.483431  |
| C  | -0.564884 | -4.327281 | 0.454762  |
| H  | -1.367274 | -5.003586 | 0.736822  |
| C  | -0.368429 | -4.029176 | -0.880658 |
| H  | -1.037602 | -4.446680 | -1.620195 |
| C  | 0.665926  | -3.154985 | -1.287988 |
| N  | 0.914178  | -2.987244 | -2.639288 |
| C  | 1.319579  | -1.708669 | -3.217864 |
| H  | 0.613814  | -1.434390 | -4.009740 |
| H  | 1.273336  | -0.919252 | -2.470173 |
| H  | 2.333388  | -1.752923 | -3.637690 |
| C  | 0.290244  | -3.883253 | -3.605084 |
| H  | 0.352440  | -4.920609 | -3.264630 |
| H  | -0.761451 | -3.626489 | -3.798398 |
| H  | 0.842574  | -3.807444 | -4.546954 |
| C  | 1.874103  | 1.579148  | 2.817892  |
| H  | 1.641543  | 2.591820  | 2.466020  |
| H  | 0.931434  | 1.022062  | 2.810972  |
| C  | 2.417604  | 1.660174  | 4.255693  |
| H  | 1.699353  | 2.198578  | 4.886798  |
| H  | 2.497056  | 0.645358  | 4.671454  |
| C  | 3.795265  | 2.332840  | 4.313810  |
| H  | 3.702061  | 3.385863  | 4.009545  |
| H  | 4.173749  | 2.337496  | 5.343585  |
| C  | 4.786402  | 1.621347  | 3.384203  |
| H  | 5.761370  | 2.124830  | 3.401487  |

|    |           |           |           |
|----|-----------|-----------|-----------|
| H  | 4.956405  | 0.597260  | 3.747639  |
| C  | 4.265985  | 1.565007  | 1.935794  |
| H  | 4.213488  | 2.589203  | 1.543764  |
| H  | 4.985309  | 1.019607  | 1.316093  |
| C  | 2.148679  | 3.498815  | -0.353906 |
| H  | 1.057136  | 3.485578  | -0.398375 |
| H  | 2.422690  | 3.645037  | 0.696189  |
| C  | 2.674569  | 4.682338  | -1.186335 |
| H  | 2.239547  | 5.614248  | -0.804346 |
| H  | 3.764208  | 4.768750  | -1.056513 |
| C  | 2.351658  | 4.512031  | -2.676829 |
| H  | 1.261264  | 4.533815  | -2.812749 |
| H  | 2.759708  | 5.351075  | -3.254284 |
| C  | 2.903140  | 3.182070  | -3.208538 |
| H  | 2.623682  | 3.043186  | -4.260407 |
| H  | 4.002928  | 3.205954  | -3.177988 |
| C  | 2.398490  | 1.985002  | -2.383810 |
| H  | 1.314215  | 1.886664  | -2.510094 |
| H  | 2.850626  | 1.061220  | -2.761835 |
| C  | -1.090620 | 2.423140  | 1.096022  |
| H  | -0.865766 | 2.007538  | 2.071330  |
| C  | -0.841791 | 1.687289  | -0.072504 |
| C  | -1.169581 | 2.263101  | -1.311207 |
| H  | -1.023143 | 1.708091  | -2.230935 |
| C  | -1.741393 | 3.537991  | -1.367538 |
| H  | -2.010628 | 3.949817  | -2.337713 |
| C  | -2.002247 | 4.274886  | -0.206648 |
| C  | -2.685689 | 5.619156  | -0.272831 |
| H  | -2.405910 | 6.256854  | 0.572749  |
| H  | -2.441218 | 6.151204  | -1.198587 |
| H  | -3.775776 | 5.494136  | -0.244507 |
| C  | -1.664248 | 3.694948  | 1.022757  |
| H  | -1.869629 | 4.234658  | 1.944913  |
| Br | -2.119411 | -1.081046 | -2.219722 |
| C  | -2.141770 | -1.047271 | 1.713501  |
| H  | -1.435636 | -0.488781 | 2.330762  |
| H  | -1.713519 | -1.995667 | 1.392084  |
| C  | -3.466033 | -1.159009 | 2.364070  |
| H  | -3.721739 | -0.331591 | 3.027147  |
| C  | -4.414584 | -2.113481 | 2.200995  |
| C  | -4.277025 | -3.285837 | 1.265040  |
| H  | -5.087924 | -3.281419 | 0.522369  |
| H  | -4.362103 | -4.239213 | 1.808461  |
| H  | -3.332492 | -3.288165 | 0.715609  |
| C  | -5.722264 | -2.034039 | 2.945336  |
| H  | -6.565629 | -1.931399 | 2.246983  |

|    |           |           |           |
|----|-----------|-----------|-----------|
| H  | -5.751226 | -1.179966 | 3.629221  |
| H  | -5.908301 | -2.947890 | 3.529380  |
| Br | -4.970761 | 1.386250  | -0.070632 |
| Zn | -2.894431 | 0.048737  | -0.002394 |

---

Statistical Thermodynamic Analysis

Temperature= 298.150 Kelvin      Pressure= 1.00000 Atm

---

|                              |                |                   |               |
|------------------------------|----------------|-------------------|---------------|
| SCF Energy=                  | -2228.17945412 | Predicted Change= | -7.865138D-09 |
| Zero-point correction (ZPE)= | -2227.2867     |                   | 0.89270       |
| Internal Energy (U)=         | -2227.2328     |                   | 0.94656       |
| Enthalpy (H)=                | -2227.2319     |                   | 0.94750       |
| Gibbs Free Energy (G)=       | -2227.3781     |                   | 0.80131       |

---

Frequencies -- -68.2928                      17.3940                      18.2056

**TS-IV- $\alpha$ -6-mem**

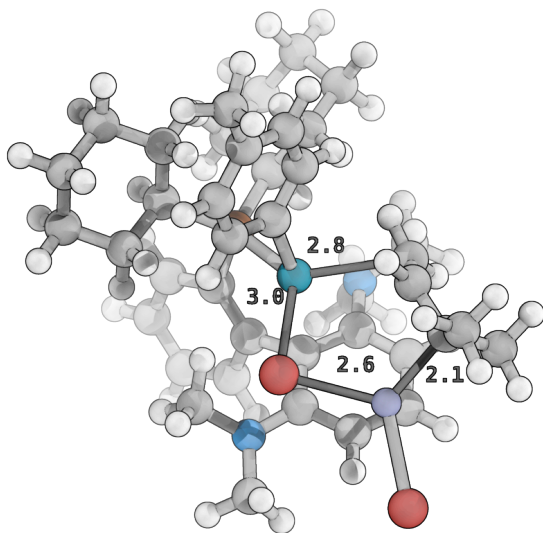


---

Using Gaussian 03: EM64L-G03RevE.01 11-Sep-2007

---

```
# b3lyp/gen pseudo=read gfpri n gfinpu t
scf=(direct,tight,maxcycle=300,xqc)
opt=(maxcycle=250,calcfc,ts,noeigentest,gdiis) iop(1/8=18) freq=noraman
#N Geom=AllCheck Guess=Read SCRF=Check Test GenChk RB3LYP/ChkBas Freq
```

---

Pointgroup= C1    Stoichiometry= C40H57Br2N2PPdZn    C1[X(C40H57Br2N2PPdZn)]  
 #Atoms= 104  
 Charge = 0    Multiplicity = 1

---

SCF Energy= -2228.17505355    Predicted Change= -1.703331D-10

---

Optimization completed. {Found 2 times}

|       |          |          |         |          |          |         |
|-------|----------|----------|---------|----------|----------|---------|
| Item  | Max Val. | Criteria | Pass?   | RMS Val. | Criteria | Pass?   |
| Force | 0.00000  | 0.00045  | [ YES ] | 0.00000  | 0.00030  | [ YES ] |
| Displ | 0.00065  | 0.00180  | [ YES ] | 0.00065  | 0.00180  | [ YES ] |

---

| Atomic Type | Coordinates (Angstroms) |           |           |
|-------------|-------------------------|-----------|-----------|
|             | X                       | Y         | Z         |
| C           | 2.095916                | -4.666571 | -2.110210 |
| H           | 2.011641                | -5.645006 | -2.575155 |
| C           | 3.282631                | -3.940352 | -2.193171 |
| H           | 4.141432                | -4.338224 | -2.726479 |
| C           | 3.358265                | -2.685449 | -1.594493 |
| H           | 4.284905                | -2.133008 | -1.693337 |
| C           | 2.269793                | -2.122008 | -0.900109 |
| P           | 2.423539                | -0.426888 | -0.150778 |
| Pd          | 0.230319                | 0.380124  | 0.220706  |
| C           | 3.464113                | -0.769181 | 1.399503  |
| H           | 2.949194                | -1.654203 | 1.793302  |
| C           | 3.560046                | 0.463380  | -1.367988 |
| H           | 4.430521                | -0.196491 | -1.480134 |
| C           | 1.068581                | -2.859945 | -0.809127 |
| C           | -0.195376               | -2.435610 | -0.103824 |
| C           | 1.012474                | -4.126111 | -1.424918 |
| H           | 0.083876                | -4.685478 | -1.365289 |
| C           | -0.297165               | -2.611605 | 1.316632  |
| N           | 0.890100                | -2.877973 | 2.084965  |
| C           | 0.860622                | -2.384532 | 3.461405  |
| H           | 1.873480                | -2.447052 | 3.874689  |
| H           | 0.542772                | -1.340264 | 3.478504  |
| H           | 0.201756                | -2.966296 | 4.128923  |
| C           | 1.288410                | -4.292721 | 2.072508  |
| H           | 0.570423                | -4.928972 | 2.618952  |
| H           | 1.371864                | -4.661775 | 1.050422  |
| H           | 2.268832                | -4.390822 | 2.552483  |
| C           | -1.545176               | -2.613858 | 1.944379  |
| H           | -1.616380               | -2.753124 | 3.016550  |
| C           | -2.708448               | -2.498679 | 1.183301  |
| H           | -3.680011               | -2.519945 | 1.669898  |
| C           | -2.652278               | -2.365005 | -0.193859 |
| H           | -3.577913               | -2.264651 | -0.745506 |
| C           | -1.411941               | -2.353201 | -0.877020 |
| N           | -1.407780               | -2.345374 | -2.259876 |
| C           | -0.408460               | -1.636928 | -3.055606 |
| H           | -0.920982               | -0.967676 | -3.754616 |
| H           | 0.214589                | -1.010508 | -2.420544 |
| H           | 0.229325                | -2.328782 | -3.622048 |

|   |           |           |           |
|---|-----------|-----------|-----------|
| C | -2.646255 | -2.608328 | -2.986804 |
| H | -3.182881 | -3.450260 | -2.541718 |
| H | -3.312058 | -1.734293 | -3.017326 |
| H | -2.385818 | -2.882577 | -4.013754 |
| C | 3.364137  | 0.340832  | 2.465814  |
| H | 3.758725  | 1.285898  | 2.072651  |
| H | 2.310753  | 0.516712  | 2.706086  |
| C | 4.129347  | -0.029058 | 3.748777  |
| H | 4.076509  | 0.806555  | 4.458147  |
| H | 3.631852  | -0.880859 | 4.234509  |
| C | 5.589944  | -0.400108 | 3.462069  |
| H | 6.124843  | 0.483430  | 3.083111  |
| H | 6.096172  | -0.698590 | 4.388539  |
| C | 5.669499  | -1.525795 | 2.423373  |
| H | 6.715500  | -1.765994 | 2.194116  |
| H | 5.223176  | -2.439994 | 2.841427  |
| C | 4.935342  | -1.150809 | 1.122884  |
| H | 5.464687  | -0.310539 | 0.654818  |
| H | 4.988021  | -1.993203 | 0.425603  |
| C | 4.105817  | 1.820923  | -0.872475 |
| H | 3.282005  | 2.518877  | -0.707505 |
| H | 4.619163  | 1.702672  | 0.087553  |
| C | 5.081221  | 2.420899  | -1.901683 |
| H | 5.439677  | 3.391741  | -1.537273 |
| H | 5.966771  | 1.773382  | -1.990796 |
| C | 4.423928  | 2.575793  | -3.279886 |
| H | 5.144204  | 2.978738  | -4.003018 |
| H | 3.605173  | 3.305545  | -3.207686 |
| C | 3.866667  | 1.234282  | -3.775240 |
| H | 3.351320  | 1.362799  | -4.735289 |
| H | 4.700527  | 0.540226  | -3.959069 |
| C | 2.899376  | 0.605779  | -2.756421 |
| H | 2.005360  | 1.233065  | -2.666751 |
| H | 2.567571  | -0.372383 | -3.121861 |
| C | 1.330299  | 2.984311  | 1.267809  |
| H | 1.507779  | 2.475897  | 2.207364  |
| C | 0.827265  | 2.305913  | 0.155002  |
| C | 0.642758  | 3.011337  | -1.040328 |
| H | 0.239911  | 2.519373  | -1.916460 |
| C | 0.941445  | 4.375327  | -1.104427 |
| H | 0.775154  | 4.903968  | -2.041272 |
| C | 1.435607  | 5.072823  | 0.006129  |
| C | 1.724680  | 6.554414  | -0.067605 |
| H | 2.423042  | 6.866691  | 0.716066  |
| H | 2.156301  | 6.832339  | -1.035796 |
| H | 0.807457  | 7.145182  | 0.057588  |



|    |           |           |           |
|----|-----------|-----------|-----------|
| C  | 1.624350  | 4.351756  | 1.188877  |
| H  | 2.009813  | 4.857700  | 2.072155  |
| Br | -2.126366 | 1.065738  | -1.555697 |
| C  | -3.577268 | 1.554079  | 2.116529  |
| C  | -4.093958 | 0.544700  | 3.150416  |
| H  | -3.920238 | 0.912011  | 4.175893  |
| H  | -3.606975 | -0.432465 | 3.069004  |
| H  | -5.171540 | 0.379900  | 3.037160  |
| C  | -4.358333 | 2.878875  | 2.203986  |
| H  | -5.429087 | 2.731775  | 2.018860  |
| H  | -3.994517 | 3.619633  | 1.480750  |
| H  | -4.265986 | 3.328571  | 3.206999  |
| C  | -2.128788 | 1.766395  | 2.122202  |
| H  | -1.798446 | 2.718205  | 1.701305  |
| C  | -1.145915 | 0.933310  | 2.568524  |
| H  | -1.374632 | -0.023062 | 3.026763  |
| H  | -0.129180 | 1.289059  | 2.672035  |
| Br | -6.046356 | -0.374405 | -0.568967 |
| Zn | -3.972573 | 0.756844  | 0.200458  |

---

Statistical Thermodynamic Analysis

Temperature= 298.150 Kelvin      Pressure= 1.00000 Atm

---

SCF Energy= -2228.17505355      Predicted Change= -1.703331D-10  
Zero-point correction (ZPE)= -2227.2816 0.89338  
Internal Energy (U)= -2227.2282 0.94678  
Enthalpy (H)= -2227.2273 0.94772  
Gibbs Free Energy (G)= -2227.3716 0.80337

---

Frequencies -- -69.5245                      15.5364                      23.4922

**TS-IV-γ-4-mem:**

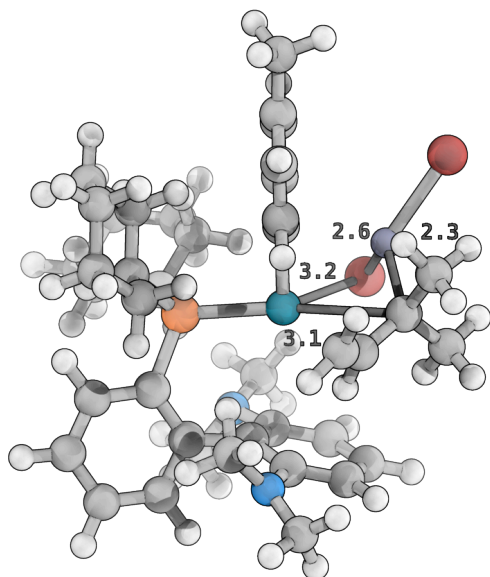


---

Using Gaussian 03: EM64L-G03RevE.01 11-Sep-2007

---

```
# b3lyp/gen pseudo=read gfprint ginput
scf=(direct,tight,maxcycle=300,xqc)
opt=(maxcycle=250,calcf,ts,noeigentest,gdiis) iop(1/8=18) freq=noraman
#N Geom=AllCheck Guess=Read SCRF=Check Test GenChk RB3LYP/ChkBas Freq
```

---

```
Pointgroup= C1  Stoichiometry= C40H57Br2N2PPdZn  C1[X(C40H57Br2N2PPdZn)]
#Atoms= 104
Charge = 0 Multiplicity = 1
```

---

```
SCF Energy= -2228.15420473  Predicted Change= -1.109863D-09
```

---

```
Optimization completed. {Found 2 times}
```

| Item  | Max Val. | Criteria | Pass?   | RMS Val. | Criteria | Pass?   |
|-------|----------|----------|---------|----------|----------|---------|
| Force | 0.00000  | 0.00045  | [ YES ] | 0.00000  | 0.00030  | [ YES ] |
| Displ | 0.00122  | 0.00180  | [ YES ] | 0.00122  | 0.00180  | [ YES ] |

---

```
Atomic Coordinates (Angstroms)
Type  X          Y          Z
```

---

|   |          |           |           |
|---|----------|-----------|-----------|
| C | 5.825076 | -0.360261 | -1.338158 |
| H | 6.798581 | -0.720296 | -1.659532 |
| C | 5.554469 | 1.004496  | -1.273419 |
| H | 6.311329 | 1.736147  | -1.542122 |
| C | 4.294192 | 1.432871  | -0.865911 |
| H | 4.120500 | 2.500504  | -0.839617 |
| C | 3.265416 | 0.535822  | -0.508404 |
| P | 1.604635 | 1.240944  | 0.010978  |

|    |           |           |           |
|----|-----------|-----------|-----------|
| Pd | -0.226958 | -0.303103 | -0.269311 |
| C  | 1.934635  | 1.697252  | 1.818648  |
| H  | 2.395605  | 0.767339  | 2.177045  |
| C  | 1.531266  | 2.853692  | -0.974081 |
| H  | 2.490572  | 3.351690  | -0.788138 |
| C  | 3.549646  | -0.850371 | -0.555544 |
| C  | 2.613929  | -1.975987 | -0.213406 |
| C  | 4.829977  | -1.262045 | -0.979553 |
| H  | 5.030762  | -2.327887 | -1.027374 |
| C  | 2.371374  | -2.336830 | 1.146151  |
| N  | 2.904873  | -1.534306 | 2.206482  |
| C  | 2.214108  | -1.642513 | 3.493981  |
| H  | 2.564976  | -0.829813 | 4.139656  |
| H  | 1.136438  | -1.542721 | 3.356893  |
| H  | 2.423239  | -2.590253 | 4.020064  |
| C  | 4.350878  | -1.694659 | 2.413536  |
| H  | 4.598167  | -2.690772 | 2.820760  |
| H  | 4.901901  | -1.551763 | 1.485306  |
| H  | 4.690051  | -0.939269 | 3.131017  |
| C  | 1.670870  | -3.516016 | 1.440752  |
| H  | 1.452242  | -3.776831 | 2.467574  |
| C  | 1.282190  | -4.373742 | 0.419706  |
| H  | 0.747924  | -5.288692 | 0.661339  |
| C  | 1.574191  | -4.082313 | -0.907133 |
| H  | 1.255950  | -4.766724 | -1.684392 |
| C  | 2.252800  | -2.897275 | -1.251566 |
| N  | 2.628836  | -2.687009 | -2.585370 |
| C  | 2.480507  | -1.398980 | -3.255783 |
| H  | 1.932278  | -1.539082 | -4.196085 |
| H  | 1.903226  | -0.706312 | -2.643302 |
| H  | 3.448859  | -0.937609 | -3.491647 |
| C  | 2.685812  | -3.818751 | -3.495577 |
| H  | 3.109079  | -4.692377 | -2.992729 |
| H  | 1.702889  | -4.095858 | -3.913696 |
| H  | 3.343991  | -3.561353 | -4.332733 |
| C  | 0.650710  | 1.931958  | 2.641210  |
| H  | 0.098526  | 2.793801  | 2.245784  |
| H  | -0.003913 | 1.059003  | 2.557239  |
| C  | 0.972235  | 2.185778  | 4.125066  |
| H  | 0.041234  | 2.398562  | 4.664675  |
| H  | 1.381488  | 1.266624  | 4.566893  |
| C  | 1.978401  | 3.328155  | 4.312958  |
| H  | 1.527119  | 4.274312  | 3.978512  |
| H  | 2.218638  | 3.455429  | 5.376043  |
| C  | 3.256605  | 3.065055  | 3.506361  |
| H  | 3.961167  | 3.900002  | 3.613083  |

|    |           |           |           |
|----|-----------|-----------|-----------|
| H  | 3.763237  | 2.174540  | 3.906271  |
| C  | 2.949294  | 2.844670  | 2.013104  |
| H  | 2.548910  | 3.780197  | 1.599740  |
| H  | 3.881265  | 2.628917  | 1.480053  |
| C  | 0.447632  | 3.857894  | -0.524604 |
| H  | -0.547044 | 3.427295  | -0.652202 |
| H  | 0.557945  | 4.092167  | 0.539061  |
| C  | 0.544825  | 5.157235  | -1.345054 |
| H  | -0.243180 | 5.848373  | -1.021108 |
| H  | 1.503702  | 5.655069  | -1.134560 |
| C  | 0.432291  | 4.886725  | -2.851442 |
| H  | 0.532709  | 5.822392  | -3.415821 |
| H  | -0.568725 | 4.489509  | -3.071376 |
| C  | 1.491600  | 3.874225  | -3.308019 |
| H  | 1.367070  | 3.641546  | -4.373235 |
| H  | 2.491477  | 4.321403  | -3.201968 |
| C  | 1.428367  | 2.572986  | -2.488928 |
| H  | 0.480890  | 2.059460  | -2.690521 |
| H  | 2.231951  | 1.899197  | -2.808191 |
| C  | -2.239080 | 1.788054  | 0.565590  |
| H  | -1.959336 | 1.550810  | 1.585227  |
| C  | -1.651659 | 1.118759  | -0.518270 |
| C  | -2.050316 | 1.443533  | -1.820896 |
| H  | -1.619762 | 0.921319  | -2.671730 |
| C  | -3.030018 | 2.417111  | -2.029966 |
| H  | -3.336174 | 2.648670  | -3.048524 |
| C  | -3.633892 | 3.091186  | -0.957333 |
| C  | -4.726958 | 4.107241  | -1.189836 |
| H  | -5.714895 | 3.632378  | -1.132084 |
| H  | -4.704369 | 4.901517  | -0.436076 |
| H  | -4.642281 | 4.571537  | -2.178121 |
| C  | -3.222860 | 2.757830  | 0.337012  |
| H  | -3.684259 | 3.246024  | 1.192042  |
| Br | -1.466645 | -1.572178 | 2.433153  |
| C  | -2.359474 | -2.193371 | -1.541082 |
| C  | -3.687331 | -1.924558 | -2.249786 |
| H  | -4.549215 | -2.161328 | -1.621687 |
| H  | -3.743466 | -2.551843 | -3.155976 |
| H  | -3.790156 | -0.881946 | -2.570022 |
| C  | -2.325912 | -3.560574 | -0.843569 |
| H  | -1.405279 | -3.710513 | -0.272177 |
| H  | -2.390117 | -4.362672 | -1.598424 |
| H  | -3.172974 | -3.702691 | -0.161376 |
| C  | -1.185000 | -1.974475 | -2.400846 |
| H  | -0.244947 | -2.374348 | -2.017313 |
| C  | -1.178763 | -1.431721 | -3.638463 |

|    |           |           |           |
|----|-----------|-----------|-----------|
| H  | -0.259179 | -1.336720 | -4.206106 |
| H  | -2.082507 | -1.080290 | -4.125945 |
| Br | -5.266825 | -0.665938 | 0.823972  |
| Zn | -2.861009 | -1.027748 | 0.351448  |

---

Statistical Thermodynamic Analysis

Temperature= 298.150 Kelvin      Pressure= 1.00000 Atm

---

SCF Energy= -2228.15420473      Predicted Change= -1.109863D-09  
Zero-point correction (ZPE)= -2227.2620 0.89220  
Internal Energy (U)= -2227.2082 0.94599  
Enthalpy (H)= -2227.2072 0.94693  
Gibbs Free Energy (G)= -2227.3525 0.80162

---

Frequencies -- -60.7485                      17.7116                      22.9111

**TS-IV- $\gamma$ -6-mem:**

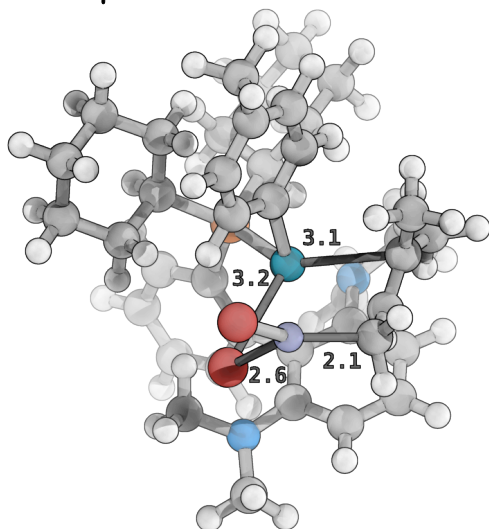


---

Using Gaussian 03: EM64L-G03RevE.01 11-Sep-2007

---

```
# b3lyp/gen pseudo=read gfp rint gfinp ut
scf=(direct,tight,maxcycle=300,xqc)
opt=(maxcycle=250,calcfc,ts,noeigentest,gdiis) iop(1/8=18) freq=noraman
#N Geom=AllCheck Guess=Read SCRF=Check Test GenChk RB3LYP/ChkBas Freq
```

---

```
Pointgroup= C1    Stoichiometry= C40H57Br2N2PPdZn    C1[X(C40H57Br2N2PPdZn)]
#Atoms= 104
Charge = 0    Multiplicity = 1
```

---

SCF Energy= -2228.17166772      Predicted Change= -1.718430D-08

---

Optimization completed. {Found 1 times}

|       |          |          |         |          |          |         |
|-------|----------|----------|---------|----------|----------|---------|
| Item  | Max Val. | Criteria | Pass?   | RMS Val. | Criteria | Pass?   |
| Force | 0.00001  | 0.00045  | [ YES ] | 0.00000  | 0.00030  | [ YES ] |
| Displ | 0.01050  | 0.00180  | [ NO ]  | 0.01050  | 0.00180  | [ YES ] |

---

| Atomic Type | Coordinates (Angstroms) |           |           |
|-------------|-------------------------|-----------|-----------|
|             | X                       | Y         | Z         |
| C           | -4.699844               | -2.198171 | 2.666420  |
| H           | -5.365216               | -2.905328 | 3.154121  |
| C           | -4.626790               | -0.875759 | 3.095984  |
| H           | -5.229895               | -0.526584 | 3.929381  |
| C           | -3.762245               | 0.005928  | 2.451365  |
| H           | -3.723032               | 1.022629  | 2.820217  |
| C           | -2.948716               | -0.386910 | 1.369424  |
| P           | -1.865391               | 0.909074  | 0.554013  |
| Pd          | 0.027169                | -0.064446 | -0.560712 |
| C           | -3.156216               | 1.789456  | -0.527439 |
| H           | -3.664375               | 0.923292  | -0.970799 |
| C           | -1.446474               | 2.069726  | 1.984668  |
| H           | -2.403705               | 2.308999  | 2.465237  |
| C           | -3.016357               | -1.735227 | 0.941428  |
| C           | -2.201511               | -2.366388 | -0.152325 |
| C           | -3.899184               | -2.609185 | 1.605899  |
| H           | -3.930253               | -3.645023 | 1.280943  |
| C           | -2.602519               | -2.203479 | -1.512370 |
| N           | -3.698546               | -1.321790 | -1.821376 |
| C           | -3.668472               | -0.730383 | -3.157810 |
| H           | -4.425290               | 0.060305  | -3.203801 |
| H           | -2.690880               | -0.285352 | -3.351413 |
| H           | -3.898080               | -1.446092 | -3.966464 |
| C           | -5.018471               | -1.922441 | -1.582008 |
| H           | -5.232498               | -2.742844 | -2.289224 |
| H           | -5.089714               | -2.310229 | -0.566583 |
| H           | -5.787456               | -1.151737 | -1.706789 |
| C           | -1.996255               | -2.949730 | -2.529164 |
| H           | -2.313356               | -2.833555 | -3.558499 |
| C           | -1.005891               | -3.876390 | -2.208347 |
| H           | -0.518192               | -4.441071 | -2.999107 |
| C           | -0.640935               | -4.100603 | -0.891845 |
| H           | 0.139740                | -4.818534 | -0.679062 |
| C           | -1.263615               | -3.408390 | 0.177930  |
| N           | -1.014633               | -3.836598 | 1.474054  |
| C           | -0.958204               | -2.978971 | 2.658475  |
| H           | 0.010307                | -3.111151 | 3.149837  |
| H           | -1.033012               | -1.930526 | 2.391187  |
| H           | -1.759453               | -3.227807 | 3.367210  |

|   |           |           |           |
|---|-----------|-----------|-----------|
| C | -0.337728 | -5.109898 | 1.683402  |
| H | -0.729435 | -5.875024 | 1.007284  |
| H | 0.752342  | -5.033443 | 1.553674  |
| H | -0.535409 | -5.436345 | 2.709185  |
| C | -2.547663 | 2.615466  | -1.676801 |
| H | -1.931512 | 3.429321  | -1.275587 |
| H | -1.882847 | 1.976516  | -2.267055 |
| C | -3.630802 | 3.214700  | -2.591741 |
| H | -3.154234 | 3.836231  | -3.360539 |
| H | -4.147159 | 2.403250  | -3.124198 |
| C | -4.661232 | 4.031380  | -1.802657 |
| H | -4.171925 | 4.913710  | -1.364102 |
| H | -5.443785 | 4.408435  | -2.472928 |
| C | -5.278865 | 3.185400  | -0.682220 |
| H | -5.992359 | 3.780382  | -0.098024 |
| H | -5.850354 | 2.355740  | -1.123781 |
| C | -4.200828 | 2.613614  | 0.257535  |
| H | -3.713329 | 3.448568  | 0.777918  |
| H | -4.681005 | 1.994097  | 1.020914  |
| C | -0.836785 | 3.422852  | 1.557460  |
| H | 0.103368  | 3.261810  | 1.027035  |
| H | -1.506811 | 3.945190  | 0.865684  |
| C | -0.576417 | 4.312768  | 2.786433  |
| H | -0.124430 | 5.257143  | 2.458258  |
| H | -1.533579 | 4.572836  | 3.263912  |
| C | 0.328618  | 3.610864  | 3.807841  |
| H | 0.485015  | 4.252976  | 4.683702  |
| H | 1.316787  | 3.442371  | 3.357448  |
| C | -0.270020 | 2.264166  | 4.235710  |
| H | 0.406847  | 1.744357  | 4.924557  |
| H | -1.204816 | 2.442020  | 4.788938  |
| C | -0.557874 | 1.355980  | 3.027251  |
| H | 0.385463  | 1.053775  | 2.559135  |
| H | -1.041867 | 0.434311  | 3.369654  |
| C | 2.165380  | 1.706943  | 0.322032  |
| H | 2.310134  | 0.949203  | 1.083546  |
| C | 1.108104  | 1.618009  | -0.592413 |
| C | 0.928386  | 2.631883  | -1.532563 |
| H | 0.127169  | 2.590643  | -2.258863 |
| C | 1.813854  | 3.716928  | -1.566801 |
| H | 1.664143  | 4.492465  | -2.315813 |
| C | 2.887216  | 3.817336  | -0.675351 |
| C | 3.848177  | 4.982900  | -0.723052 |
| H | 4.875275  | 4.642268  | -0.901089 |
| H | 3.584893  | 5.686004  | -1.519829 |
| H | 3.854310  | 5.536945  | 0.223867  |

|    |           |           |           |
|----|-----------|-----------|-----------|
| C  | 3.048562  | 2.790943  | 0.264810  |
| H  | 3.880373  | 2.817646  | 0.965036  |
| Br | 1.921003  | -1.772179 | 1.326512  |
| C  | 3.272871  | -1.754313 | -2.168098 |
| H  | 3.391104  | -2.842622 | -2.113868 |
| H  | 4.010376  | -1.353810 | -2.869584 |
| C  | 1.889344  | -1.406608 | -2.531908 |
| H  | 1.124723  | -2.151022 | -2.306265 |
| C  | 1.501997  | -0.305335 | -3.247452 |
| C  | 2.519027  | 0.719142  | -3.687833 |
| H  | 2.044110  | 1.664739  | -3.966857 |
| H  | 3.068304  | 0.358012  | -4.571450 |
| H  | 3.259381  | 0.930461  | -2.910086 |
| C  | 0.156563  | -0.215907 | -3.922906 |
| H  | 0.279942  | -0.327767 | -5.012339 |
| H  | -0.325081 | 0.760405  | -3.772155 |
| H  | -0.522541 | -1.001962 | -3.584147 |
| Br | 5.920409  | -0.229087 | 0.719113  |
| Zn | 3.860252  | -1.162386 | -0.266214 |

---

Statistical Thermodynamic Analysis

Temperature= 298.150 Kelvin      Pressure= 1.00000 Atm

---

|                              |                |                   |               |
|------------------------------|----------------|-------------------|---------------|
| SCF Energy=                  | -2228.17166772 | Predicted Change= | -1.718430D-08 |
| Zero-point correction (ZPE)= | -2227.2787     | 0.89292           |               |
| Internal Energy (U)=         | -2227.2250     | 0.94664           |               |
| Enthalpy (H)=                | -2227.2240     | 0.94758           |               |
| Gibbs Free Energy (G)=       | -2227.3715     | 0.80015           |               |

---

Frequencies -- -54.0448                      12.8572                      17.7196

**TS-VI- $\eta^1$ - $\alpha$ :**

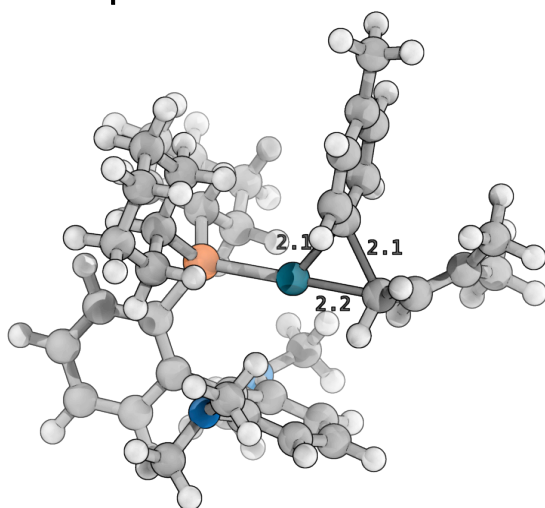



Using Gaussian 03: EM64L-G03RevE.01 11-Sep-2007

```
# b3lyp/gen pseudo=read gfprint ginput
scf=(direct,tight,maxcycle=300,xqc)
opt=(maxcycle=250,calcfc,ts,noeigentest) freq=noraman
#N Geom=AllCheck Guess=Read SCRF=Check GenChk RB3LYP/ChkBas Freq
```

```
Pointgroup= C1  Stoichiometry= C40H57N2PPd  C1[X(C40H57N2PPd)] #Atoms=
101
Charge = 0 Multiplicity = 1
```

```
SCF Energy= -2136.12385141  Predicted Change= -9.024289D-10
```

```
Optimization completed on the basis of negligible forces. {Found 2 times}
```

| Item  | Max Val. | Criteria | Pass?   | RMS Val. | Criteria | Pass?   |
|-------|----------|----------|---------|----------|----------|---------|
| Force | 0.00000  | 0.00045  | [ YES ] | 0.00000  | 0.00030  | [ YES ] |
| Displ | 0.00246  | 0.00180  | [ NO ]  | 0.00246  | 0.00180  | [ YES ] |

```
Atomic Coordinates (Angstroms)
Type X Y Z
```

|    |           |           |           |
|----|-----------|-----------|-----------|
| C  | 5.394518  | 0.744090  | 0.160557  |
| H  | 6.476648  | 0.659059  | 0.105930  |
| C  | 4.793472  | 1.915501  | 0.612632  |
| H  | 5.395440  | 2.767327  | 0.917868  |
| C  | 3.403416  | 1.990837  | 0.665757  |
| H  | 2.960196  | 2.918580  | 1.007247  |
| C  | 2.569888  | 0.920613  | 0.286226  |
| P  | 0.715854  | 1.139926  | 0.386585  |
| Pd | -0.799548 | -0.468409 | -0.478624 |
| C  | 0.497302  | 2.850464  | -0.382306 |
| H  | 1.211558  | 3.535884  | 0.094483  |
| C  | 0.334107  | 1.430498  | 2.218313  |
| H  | -0.728818 | 1.711161  | 2.175527  |
| C  | 3.183584  | -0.264581 | -0.188366 |
| C  | 2.463824  | -1.483551 | -0.703454 |
| C  | 4.589506  | -0.320421 | -0.236438 |
| H  | 5.057280  | -1.228212 | -0.608812 |
| C  | 2.163219  | -1.584045 | -2.084920 |
| N  | 2.429860  | -0.468722 | -2.952764 |
| C  | 1.405376  | -0.218714 | -3.963424 |
| H  | 1.563522  | 0.782150  | -4.381162 |
| H  | 0.416621  | -0.246935 | -3.498045 |
| H  | 1.421961  | -0.934134 | -4.806616 |
| C  | 3.762558  | -0.485415 | -3.555713 |
| H  | 4.529158  | -0.575188 | -2.784861 |

|   |           |           |           |
|---|-----------|-----------|-----------|
| H | 3.926086  | 0.458764  | -4.087831 |
| H | 3.893032  | -1.313409 | -4.277544 |
| C | 1.574758  | -2.751915 | -2.590293 |
| H | 1.343781  | -2.821533 | -3.648282 |
| C | 1.277888  | -3.817782 | -1.747267 |
| H | 0.824163  | -4.720542 | -2.148023 |
| C | 1.580396  | -3.734846 | -0.391517 |
| H | 1.357463  | -4.575391 | 0.256784  |
| C | 2.172674  | -2.582003 | 0.146147  |
| N | 2.447521  | -2.496244 | 1.552938  |
| C | 3.822633  | -2.829685 | 1.929382  |
| H | 3.966218  | -2.602024 | 2.991757  |
| H | 4.533662  | -2.232848 | 1.358883  |
| H | 4.054908  | -3.899563 | 1.772993  |
| C | 1.501525  | -3.200066 | 2.414165  |
| H | 0.477995  | -2.969170 | 2.109798  |
| H | 1.641744  | -2.852385 | 3.443910  |
| H | 1.630422  | -4.298112 | 2.417310  |
| C | 0.818814  | 2.804017  | -1.890187 |
| H | 0.133429  | 2.093557  | -2.371553 |
| H | 1.830762  | 2.416697  | -2.053341 |
| C | 0.661114  | 4.186931  | -2.542645 |
| H | 0.870777  | 4.116080  | -3.618211 |
| H | 1.410470  | 4.875832  | -2.124280 |
| C | -0.743442 | 4.761739  | -2.308999 |
| H | -1.481270 | 4.133908  | -2.829904 |
| H | -0.823701 | 5.766954  | -2.743014 |
| C | -1.082311 | 4.798270  | -0.811897 |
| H | -2.108565 | 5.157186  | -0.661398 |
| H | -0.421535 | 5.521458  | -0.310030 |
| C | -0.919846 | 3.416835  | -0.152390 |
| H | -1.663068 | 2.722105  | -0.563659 |
| H | -1.132015 | 3.503812  | 0.919549  |
| C | 0.417477  | 0.112236  | 3.012066  |
| H | 1.457474  | -0.239819 | 3.026790  |
| H | -0.164728 | -0.657881 | 2.493261  |
| C | -0.100009 | 0.284703  | 4.450468  |
| H | 0.013178  | -0.658317 | 5.001709  |
| H | -1.178404 | 0.500373  | 4.420267  |
| C | 0.620088  | 1.422661  | 5.188097  |
| H | 1.676485  | 1.151019  | 5.332389  |
| H | 0.192593  | 1.560682  | 6.189707  |
| C | 0.542873  | 2.731696  | 4.389665  |
| H | 1.102375  | 3.525628  | 4.901695  |
| H | -0.503464 | 3.067765  | 4.340301  |
| C | 1.087227  | 2.550984  | 2.960676  |

|   |           |           |           |
|---|-----------|-----------|-----------|
| H | 2.152913  | 2.297005  | 3.022254  |
| H | 1.014155  | 3.501960  | 2.418044  |
| C | -3.354007 | 0.616407  | -1.595613 |
| H | -2.849022 | 0.637631  | -2.558579 |
| C | -2.851032 | -0.193620 | -0.557769 |
| C | -3.566813 | -0.229144 | 0.648178  |
| H | -3.244555 | -0.890811 | 1.447019  |
| C | -4.702220 | 0.566815  | 0.831212  |
| H | -5.224850 | 0.533090  | 1.786278  |
| C | -5.187414 | 1.396754  | -0.185966 |
| C | -6.437826 | 2.225244  | 0.001236  |
| H | -6.319616 | 3.234992  | -0.410488 |
| H | -6.695340 | 2.324759  | 1.061340  |
| H | -7.303716 | 1.774191  | -0.503232 |
| C | -4.490432 | 1.401943  | -1.404517 |
| H | -4.846695 | 2.027956  | -2.221750 |
| C | -2.183288 | -2.055871 | -1.188354 |
| C | -2.422451 | -3.075157 | -0.145330 |
| H | -1.529377 | -3.395855 | 0.390894  |
| C | -3.592678 | -3.641636 | 0.216221  |
| C | -4.926719 | -3.320853 | -0.409302 |
| H | -5.627082 | -2.938719 | 0.346369  |
| H | -5.386215 | -4.226907 | -0.830985 |
| H | -4.861183 | -2.570521 | -1.199854 |
| C | -3.639033 | -4.687405 | 1.304100  |
| H | -4.301243 | -4.378967 | 2.126446  |
| H | -2.647355 | -4.884563 | 1.725001  |
| H | -4.042099 | -5.638615 | 0.926109  |
| H | -1.227487 | -2.249184 | -1.712841 |
| H | -2.957634 | -1.990442 | -1.947485 |

---

Statistical Thermodynamic Analysis

Temperature= 298.150 Kelvin      Pressure= 1.00000 Atm

---

SCF Energy= -2136.12385141      Predicted Change= -9.024289D-10

Zero-point correction (ZPE)= -2135.2360 0.88782

Internal Energy (U)= -2135.1882 0.93563

Enthalpy (H)= -2135.1872 0.93657

Gibbs Free Energy (G)= -2135.3218 0.80200

---

Frequencies -- -320.7174                      9.9835                      15.8974

**TS-VI-  $\eta^3$ - $\gamma$ :**

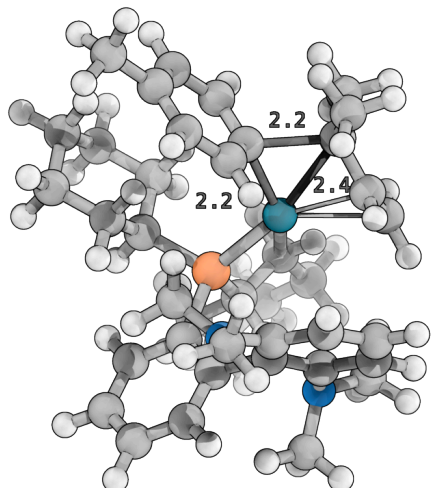


---

Using Gaussian 03: EM64L-G03RevE.01 11-Sep-2007

---

```
# b3lyp/gen pseudo=read gfprint gfinput
scf=(direct,tight,maxcycle=300,xqc)
opt=(maxcycle=250,calcfc,ts,noeigentest) freq=noraman
#N Geom=AllCheck Guess=Read SCRF=Check GenChk RB3LYP/ChkBas Freq
```

---

```
Pointgroup= C1  Stoichiometry= C40H57N2PPd  C1[X(C40H57N2PPd)] #Atoms=
101
Charge = 0 Multiplicity = 1
```

---

```
SCF Energy= -2136.11180380  Predicted Change= -5.083163D-09
```

---

```
Optimization completed. {Found 1 times}
```

| Item  | Max Val. | Criteria | Pass?   | RMS Val. | Criteria | Pass?   |
|-------|----------|----------|---------|----------|----------|---------|
| Force | 0.00000  | 0.00045  | [ YES ] | 0.00000  | 0.00030  | [ YES ] |
| Displ | 0.00213  | 0.00180  | [ NO ]  | 0.00213  | 0.00180  | [ YES ] |

---

```
Atomic Coordinates (Angstroms)
Type X Y Z
```

---

|    |           |           |           |
|----|-----------|-----------|-----------|
| C  | -2.736981 | -0.915160 | 4.078125  |
| H  | -3.192691 | -1.365575 | 4.956044  |
| C  | -2.440612 | 0.445148  | 4.045108  |
| H  | -2.660588 | 1.083768  | 4.896617  |
| C  | -1.845017 | 0.986877  | 2.908644  |
| H  | -1.608005 | 2.042982  | 2.925389  |
| C  | -1.528916 | 0.219287  | 1.768768  |
| P  | -0.673109 | 1.074747  | 0.322638  |
| Pd | 0.577895  | -0.196488 | -1.247086 |
| C  | -2.151356 | 1.975696  | -0.474188 |
| H  | -2.886512 | 1.161643  | -0.522376 |

---

|   |           |           |           |
|---|-----------|-----------|-----------|
| C | 0.302525  | 2.438242  | 1.207427  |
| H | -0.395754 | 3.030843  | 1.813060  |
| C | -1.853073 | -1.162132 | 1.801106  |
| C | -1.615877 | -2.162207 | 0.705613  |
| C | -2.440405 | -1.695547 | 2.965949  |
| H | -2.660162 | -2.758809 | 2.983087  |
| C | -2.458891 | -2.208157 | -0.430391 |
| N | -3.518883 | -1.247965 | -0.565958 |
| C | -3.944509 | -0.961908 | -1.931566 |
| H | -4.515410 | -1.782160 | -2.404075 |
| H | -4.597912 | -0.082269 | -1.914708 |
| H | -3.074281 | -0.732040 | -2.549411 |
| C | -4.683304 | -1.521370 | 0.282245  |
| H | -4.380755 | -1.656892 | 1.320554  |
| H | -5.366988 | -0.665889 | 0.236335  |
| H | -5.235114 | -2.421575 | -0.044521 |
| C | -2.298731 | -3.224694 | -1.385512 |
| H | -2.951375 | -3.266943 | -2.249932 |
| C | -1.328608 | -4.204892 | -1.210168 |
| H | -1.209895 | -4.989132 | -1.954141 |
| C | -0.524599 | -4.204675 | -0.075386 |
| H | 0.221024  | -4.981921 | 0.049772  |
| C | -0.666509 | -3.208136 | 0.908173  |
| N | 0.053608  | -3.312705 | 2.117106  |
| C | 0.558349  | -4.615003 | 2.509288  |
| H | 0.769412  | -4.596698 | 3.585216  |
| H | -0.191728 | -5.388571 | 2.322105  |
| H | 1.494428  | -4.903277 | 1.995714  |
| C | 0.897692  | -2.222611 | 2.598107  |
| H | 1.962301  | -2.450417 | 2.436320  |
| H | 0.681359  | -1.299419 | 2.067333  |
| H | 0.741121  | -2.057522 | 3.672438  |
| C | -1.856714 | 2.422391  | -1.922610 |
| H | -1.075382 | 3.194067  | -1.928903 |
| H | -1.459024 | 1.574759  | -2.490946 |
| C | -3.111866 | 2.988579  | -2.609064 |
| H | -2.857936 | 3.331574  | -3.620825 |
| H | -3.853645 | 2.185350  | -2.729427 |
| C | -3.736616 | 4.132915  | -1.798448 |
| H | -3.039693 | 4.984160  | -1.777058 |
| H | -4.653625 | 4.491631  | -2.283760 |
| C | -4.032197 | 3.687619  | -0.359917 |
| H | -4.437494 | 4.524017  | 0.224789  |
| H | -4.810432 | 2.910054  | -0.373078 |
| C | -2.775371 | 3.130621  | 0.335117  |
| H | -2.048599 | 3.947069  | 0.450515  |

|   |           |           |           |
|---|-----------|-----------|-----------|
| H | -3.041330 | 2.793918  | 1.342649  |
| C | 0.953395  | 3.413089  | 0.203242  |
| H | 1.619318  | 2.853752  | -0.463880 |
| H | 0.190392  | 3.879860  | -0.428417 |
| C | 1.749415  | 4.515439  | 0.925626  |
| H | 2.225983  | 5.170429  | 0.184313  |
| H | 1.053436  | 5.147929  | 1.497602  |
| C | 2.801556  | 3.931481  | 1.878003  |
| H | 3.563264  | 3.398566  | 1.292725  |
| H | 3.318733  | 4.738151  | 2.414172  |
| C | 2.161733  | 2.952458  | 2.871955  |
| H | 2.931852  | 2.498632  | 3.508966  |
| H | 1.486293  | 3.505283  | 3.542806  |
| C | 1.371733  | 1.846030  | 2.150937  |
| H | 2.062104  | 1.224985  | 1.568189  |
| H | 0.901325  | 1.191076  | 2.892861  |
| C | 3.537973  | 0.877285  | -0.948693 |
| H | 3.284776  | 1.698406  | -1.613264 |
| C | 2.728492  | -0.269378 | -0.906115 |
| C | 3.125759  | -1.293424 | -0.026688 |
| H | 2.548822  | -2.213624 | 0.023033  |
| C | 4.248161  | -1.160581 | 0.792370  |
| H | 4.511433  | -1.969589 | 1.472983  |
| C | 5.051784  | -0.012464 | 0.746987  |
| C | 6.298436  | 0.106219  | 1.593224  |
| H | 6.176181  | -0.392930 | 2.561431  |
| H | 7.166577  | -0.354631 | 1.101440  |
| H | 6.554980  | 1.153974  | 1.785237  |
| C | 4.674185  | 1.001276  | -0.142389 |
| H | 5.277321  | 1.905993  | -0.208195 |
| C | 2.181860  | -0.965079 | -2.891774 |
| C | 2.509479  | 0.217896  | -3.789883 |
| H | 2.450146  | -0.102320 | -4.840653 |
| H | 1.820639  | 1.057083  | -3.657855 |
| H | 3.525644  | 0.578253  | -3.609280 |
| C | 3.264278  | -2.036513 | -2.938107 |
| H | 3.044305  | -2.871265 | -2.266667 |
| H | 3.313624  | -2.438467 | -3.962376 |
| H | 4.248405  | -1.636896 | -2.679135 |
| C | 0.832632  | -1.526618 | -3.019953 |
| H | 0.707850  | -2.544154 | -2.648212 |
| C | -0.288085 | -0.900182 | -3.518536 |
| H | -1.220830 | -1.448950 | -3.571388 |
| H | -0.244700 | 0.048762  | -4.042625 |

---

Statistical Thermodynamic Analysis

Temperature= 298.150 Kelvin      Pressure= 1.00000 Atm

---

---

|                              |                |                   |               |
|------------------------------|----------------|-------------------|---------------|
| SCF Energy=                  | -2136.11180380 | Predicted Change= | -5.083163D-09 |
| Zero-point correction (ZPE)= | -2135.2223     | 0.88941           |               |
| Internal Energy (U)=         | -2135.1754     | 0.93638           |               |
| Enthalpy (H)=                | -2135.1744     | 0.93733           |               |
| Gibbs Free Energy (G)=       | -2135.3024     | 0.80939           |               |

---

Frequencies -- -287.5205            13.7402            24.9558

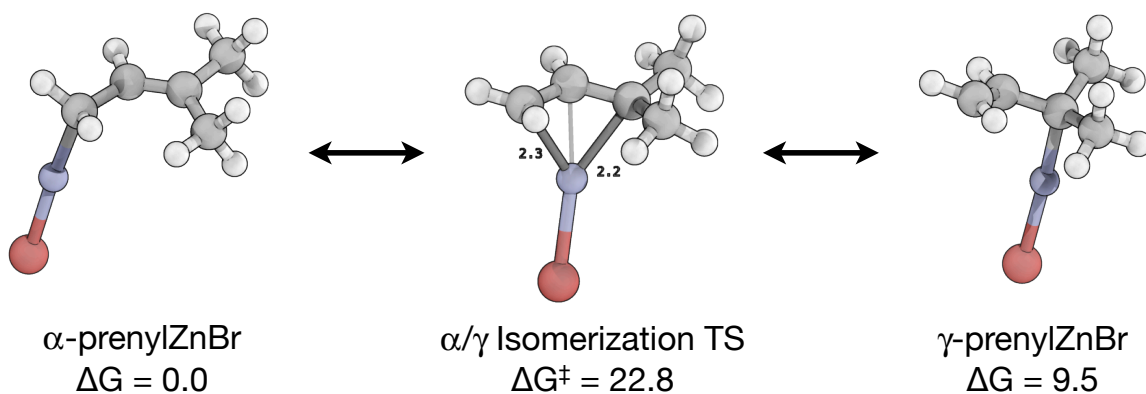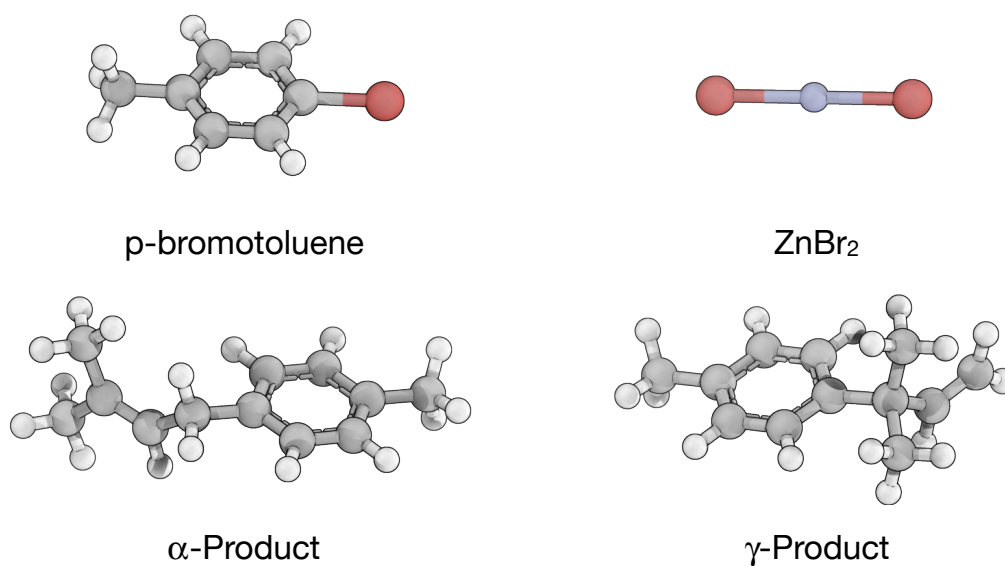

**Figure X.** Structures for all relevant minor intermediates, starting materials, and products; including the interconversion of prenylZnBr.<sup>10</sup> Energies are displayed in kcal/mol and distances in Å. Computed structures are rendered in Pymol.<sup>11</sup>

#### $\alpha$ -prenylZnBr:

---

Using Gaussian 03: EM64L-G03RevE.01 11-Sep-2007

---

# b3lyp/gen pseudo=read gfpint gfinput  
 scf=(direct,tight,maxcycle=300,xqc) opt=(maxcycle=250) freq=noraman  
 #N Geom=AllCheck Guess=Read SCRF=Check GenChk RB3LYP/ChkBas Freq

---

Pointgroup= C1 Stoichiometry= C5H9BrZn C1[X(C5H9BrZn)] #Atoms= 16  
 Charge = 0 Multiplicity = 1

---

SCF Energy= -274.741185418 Predicted Change= -4.179115D-07

---



Optimization completed. {Found 1 times}

| Item  | Max Val. | Criteria | Pass?   | RMS Val. | Criteria | Pass?   |
|-------|----------|----------|---------|----------|----------|---------|
| Force | 0.00001  | 0.00045  | [ YES ] | 0.00000  | 0.00030  | [ YES ] |
| Displ | 0.02094  | 0.00180  | [ NO ]  | 0.02094  | 0.00180  | [ NO ]  |

---

| Atomic | Coordinates (Angstroms) |   |   |
|--------|-------------------------|---|---|
| Type   | X                       | Y | Z |

---

|    |           |           |           |
|----|-----------|-----------|-----------|
| C  | 1.270521  | 1.511996  | -0.037352 |
| H  | 1.511769  | 1.792602  | 0.991438  |
| H  | 1.171115  | 2.430130  | -0.624438 |
| C  | 2.247675  | 0.567028  | -0.653786 |
| H  | 2.265395  | 0.581095  | -1.744980 |
| C  | 3.080623  | -0.296948 | -0.041655 |
| C  | 4.003082  | -1.182749 | -0.843001 |
| H  | 3.893022  | -1.020053 | -1.920040 |
| H  | 3.811053  | -2.246371 | -0.639658 |
| H  | 5.055165  | -1.003238 | -0.579211 |
| C  | 3.169857  | -0.471564 | 1.453816  |
| H  | 2.898708  | -1.497276 | 1.743669  |
| H  | 2.523243  | 0.213116  | 2.009323  |
| H  | 4.199195  | -0.315174 | 1.805332  |
| Zn | -0.564866 | 0.642611  | -0.000526 |
| Br | -2.657521 | -0.542278 | -0.008394 |

---

Statistical Thermodynamic Analysis

Temperature= 298.150 Kelvin      Pressure= 1.00000 Atm

---

|                              |                |                   |               |
|------------------------------|----------------|-------------------|---------------|
| SCF Energy=                  | -274.741185418 | Predicted Change= | -4.179115D-07 |
| Zero-point correction (ZPE)= | -274.6140      |                   | 0.12715       |
| Internal Energy (U)=         | -274.6038      |                   | 0.13735       |
| Enthalpy (H)=                | -274.6028      |                   | 0.13829       |
| Gibbs Free Energy (G)=       | -274.6531      |                   | 0.08802       |

---

|                |         |         |         |
|----------------|---------|---------|---------|
| Frequencies -- | 25.6209 | 41.5671 | 81.0463 |
|----------------|---------|---------|---------|

$\Delta G_{\text{Solvation}} = -0.0342800329999591$

---

**$\alpha/\gamma$ -prenylZnBr:**

---

Using Gaussian 03: EM64L-G03RevE.01 11-Sep-2007

---

```
# b3lyp/gen pseudo=read gfpri n gfinpu  
scf=(direct,tight,maxcycle=300,xqc)  
opt=(maxcycle=250,calcf,ts,noeigentest) freq=noraman  
#N Geom=AllCheck Guess=Read SCRF=Check GenChk RB3LYP/ChkBas Freq
```

---

Pointgroup= C1 Stoichiometry= C5H9BrZn C1[X(C5H9BrZn)] #Atoms= 16  
Charge = 0 Multiplicity = 1

---

SCF Energy= -274.706185584 Predicted Change= -1.259105D-09

---

Optimization completed. {Found 2 times}

| Item  | Max Val. | Criteria | Pass?   | RMS Val. | Criteria | Pass?   |
|-------|----------|----------|---------|----------|----------|---------|
| Force | 0.00000  | 0.00045  | [ YES ] | 0.00000  | 0.00030  | [ YES ] |
| Displ | 0.00034  | 0.00180  | [ YES ] | 0.00034  | 0.00180  | [ YES ] |

---

Atomic Coordinates (Angstroms)

| Atomic Type | X         | Y         | Z         |
|-------------|-----------|-----------|-----------|
| C           | 1.412138  | 2.042563  | 0.112499  |
| H           | 1.429291  | 2.148402  | 1.195352  |
| H           | 1.301640  | 2.960498  | -0.452652 |
| C           | 1.979163  | 0.917340  | -0.515565 |
| H           | 2.158515  | 1.009877  | -1.591490 |
| C           | 2.083705  | -0.419332 | -0.000677 |
| C           | 2.807395  | -1.456878 | -0.836251 |
| H           | 3.888154  | -1.470557 | -0.619343 |
| H           | 2.692988  | -1.266227 | -1.910055 |
| H           | 2.432104  | -2.467367 | -0.638489 |
| C           | 2.205932  | -0.613696 | 1.508628  |
| H           | 3.215361  | -0.348924 | 1.863236  |
| H           | 2.024357  | -1.657827 | 1.783638  |
| H           | 1.508270  | 0.000346  | 2.097135  |
| Zn          | -0.033637 | 0.231208  | -0.142269 |
| Br          | -2.359187 | -0.247555 | 0.026541  |

---

Statistical Thermodynamic Analysis

Temperature= 298.150 Kelvin Pressure= 1.00000 Atm

---

SCF Energy= -274.706185584 Predicted Change= -1.259105D-09  
Zero-point correction (ZPE)= -274.5804 0.12574  
Internal Energy (U)= -274.5709 0.13523  
Enthalpy (H)= -274.5700 0.13618  
Gibbs Free Energy (G)= -274.6168 0.08929

---

Frequencies -- -223.1991 54.6105 76.0052

$\Delta G_{\text{Solvation}} = -0.0264277869999887$

---

**$\gamma$ -prenylZnBr:**

---

Using Gaussian 03: EM64L-G03RevE.01 11-Sep-2007

---

```
# b3lyp/gen pseudo=read gfprint ginput
scf=(direct,tight,maxcycle=300,xqc) opt=(maxcycle=250) freq=noraman
#N Geom=AllCheck Guess=Read SCRF=Check GenChk RB3LYP/ChkBas Freq
```

---

Pointgroup= C1 Stoichiometry= C5H9BrZn C1[X(C5H9BrZn)] #Atoms= 16  
Charge = 0 Multiplicity = 1

---

SCF Energy= -274.727231796 Predicted Change= -1.076481D-07

---

Optimization completed. {Found 1 times}

| Item  | Max Val. | Criteria | Pass?   | RMS Val. | Criteria | Pass?   |
|-------|----------|----------|---------|----------|----------|---------|
| Force | 0.00003  | 0.00045  | [ YES ] | 0.00000  | 0.00030  | [ YES ] |
| Displ | 0.00864  | 0.00180  | [ NO ]  | 0.00864  | 0.00180  | [ NO ]  |

---

| Atomic Type | Coordinates (Angstroms) |   |   |
|-------------|-------------------------|---|---|
|             | X                       | Y | Z |

---

|    |           |           |           |
|----|-----------|-----------|-----------|
| C  | 2.869635  | 1.977353  | -0.090616 |
| H  | 3.051944  | 2.044971  | 0.978143  |
| H  | 3.145044  | 2.845575  | -0.681958 |
| C  | 2.330649  | 0.893173  | -0.668302 |
| H  | 2.194840  | 0.910581  | -1.752702 |
| C  | 1.890703  | -0.376113 | -0.005726 |
| C  | 2.302865  | -1.603594 | -0.838198 |
| H  | 3.400252  | -1.698878 | -0.846755 |
| H  | 1.976256  | -1.526897 | -1.882278 |
| H  | 1.897087  | -2.534507 | -0.425979 |
| C  | 2.366088  | -0.516086 | 1.445721  |
| H  | 3.467049  | -0.510452 | 1.482224  |
| H  | 2.025815  | -1.459194 | 1.887916  |
| H  | 2.018049  | 0.299075  | 2.090560  |
| Zn | -0.158090 | -0.193226 | -0.007030 |
| Br | -2.542665 | 0.147946  | 0.008699  |

---

Statistical Thermodynamic Analysis

Temperature= 298.150 Kelvin Pressure= 1.00000 Atm

---

|                              |                |                   |               |
|------------------------------|----------------|-------------------|---------------|
| SCF Energy=                  | -274.727231796 | Predicted Change= | -1.076481D-07 |
| Zero-point correction (ZPE)= | -274.6001      | 0.12706           |               |
| Internal Energy (U)=         | -274.5901      | 0.13712           |               |
| Enthalpy (H)=                | -274.5891      | 0.13806           |               |
| Gibbs Free Energy (G)=       | -274.6379      | 0.08924           |               |

---

Frequencies -- 35.1449 44.4986 104.6673

$\Delta G_{\text{Solvation}} = -0.0345173110000019$

**p-bromotoluene:**

---

Using Gaussian 03: EM64L-G03RevE.01 11-Sep-2007

---

# b3lyp/gen pseudo=read gfp rint gfinput  
scf=(direct,tight,maxcycle=300,xqc) opt=(maxcycle=250) freq=noraman  
#N Geom=AllCheck Guess=Read SCRF=Check GenChk RB3LYP/ChkBas Freq

---

Pointgroup= C1 Stoichiometry= C7H7Br C1[X(C7H7Br)] #Atoms= 15  
Charge = 0 Multiplicity = 1

---

SCF Energy= -284.120087119 Predicted Change= -1.537413D-07

---

Optimization completed. {Found 2 times}

| Item  | Max Val. | Criteria | Pass?   | RMS Val. | Criteria | Pass?   |
|-------|----------|----------|---------|----------|----------|---------|
| Force | 0.00009  | 0.00045  | [ YES ] | 0.00002  | 0.00030  | [ YES ] |
| Displ | 0.00064  | 0.00180  | [ YES ] | 0.00064  | 0.00180  | [ YES ] |

---

Atomic Coordinates (Angstroms)

| Type | X | Y | Z |
|------|---|---|---|
|------|---|---|---|

---

|    |           |           |           |
|----|-----------|-----------|-----------|
| C  | -0.312390 | 0.000006  | -0.000567 |
| C  | 0.366574  | 1.214021  | -0.004396 |
| C  | 0.366566  | -1.214020 | -0.004399 |
| C  | 1.762788  | -1.201156 | -0.010221 |
| C  | 1.762795  | 1.201172  | -0.010223 |
| C  | 2.484003  | 0.000004  | -0.010181 |
| H  | 2.297508  | -2.148246 | -0.016771 |
| C  | 3.994889  | -0.000010 | 0.015526  |
| H  | -0.177564 | 2.152182  | -0.006892 |
| H  | 2.297524  | 2.148256  | -0.016765 |
| H  | -0.177559 | -2.152182 | -0.006886 |
| H  | 4.374545  | -0.000391 | 1.046110  |
| H  | 4.404203  | 0.886293  | -0.480638 |
| H  | 4.404203  | -0.885961 | -0.481274 |
| Br | -2.284978 | -0.000002 | 0.003140  |

---

Statistical Thermodynamic Analysis

Temperature= 298.150 Kelvin Pressure= 1.00000 Atm

---

|                              |                |                   |               |
|------------------------------|----------------|-------------------|---------------|
| SCF Energy=                  | -284.120087119 | Predicted Change= | -1.537413D-07 |
| Zero-point correction (ZPE)= | -284.0020      | 0.11803           |               |
| Internal Energy (U)=         | -283.9943      | 0.12572           |               |
| Enthalpy (H)=                | -283.9934      | 0.12666           |               |
| Gibbs Free Energy (G)=       | -284.0363      | 0.08373           |               |

---

Frequencies -- 29.5690 104.8033 206.9485  
 $\Delta G_{\text{Solvation}} = -0.00293244800002412$

### ZnBr<sup>2</sup>:

-----  
Using Gaussian 09: AM64L-G09RevC.01 23-Sep-2011  
=====

# b3lyp/gen pseudo=read gfpinput gfinput  
scf=(direct,tight,maxcycle=300,xqc) opt=(maxcycle=250) freq=noraman  
#N Geom=AllCheck Guess=TCheck SCRF=Check GenChk RB3LYP/ChkBas Freq

-----  
Pointgroup= C1 Stoichiometry= Br2Zn C1[X(Br2Zn)] #Atoms= 3  
Charge = 0 Multiplicity = 1  
-----

SCF Energy= -92.0235652765 Predicted Change= -2.393722D-09  
=====

Optimization completed. {Found 2 times}

| Item  | Max Val. | Criteria | Pass?   | RMS Val. | Criteria | Pass?   |
|-------|----------|----------|---------|----------|----------|---------|
| Force | 0.00001  | 0.00045  | [ YES ] | 0.00001  | 0.00030  | [ YES ] |
| Displ | 0.00034  | 0.00180  | [ YES ] | 0.00034  | 0.00180  | [ YES ] |

-----  
Atomic Coordinates (Angstroms)  
Type X Y Z

|    |           |           |           |
|----|-----------|-----------|-----------|
| Br | 1.727500  | -0.163127 | -1.583811 |
| Br | -1.727508 | 0.162957  | 1.583836  |
| Zn | 0.000009  | 0.000199  | -0.000029 |

-----  
Statistical Thermodynamic Analysis

Temperature= 298.150 Kelvin Pressure= 1.00000 Atm  
=====

SCF Energy= -92.0235652765 Predicted Change= -2.393722D-09  
Zero-point correction (ZPE)= -92.0222 0.00136  
Internal Energy (U)= -92.0176 0.00594  
Enthalpy (H)= -92.0166 0.00689  
Gibbs Free Energy (G)= -92.0463 -0.02280  
-----

Frequencies -- 63.5376 187.9715 347.2022  
 $\Delta G_{\text{Solvation}} = -0.0497805409999899$

### $\alpha$ -Product:

-----  
Using Gaussian 03: EM64L-G03RevE.01 11-Sep-2007  
=====

# b3lyp/gen gfpinput gfinput scf=(direct,tight,maxcycle=300,xqc)  
opt=(maxcycle=250) freq=noraman

#N Geom=AllCheck Guess=Read SCRF=Check GenChk RB3LYP/ChkBas Freq

Pointgroup= C1 Stoichiometry= C12H16 C1[X(C12H16)] #Atoms= 28

Charge = 0 Multiplicity = 1

SCF Energy= -466.901455254 Predicted Change= -3.719157D-08

Optimization completed on the basis of negligible forces. {Found 2 times}

| Item  | Max Val. | Criteria | Pass?   | RMS Val. | Criteria | Pass?   |
|-------|----------|----------|---------|----------|----------|---------|
| Force | 0.00000  | 0.00045  | [ YES ] | 0.00000  | 0.00030  | [ YES ] |
| Displ | 0.01570  | 0.00180  | [ NO ]  | 0.01570  | 0.00180  | [ NO ]  |

Atomic Coordinates (Angstroms)

| Type | X | Y | Z |
|------|---|---|---|
|------|---|---|---|

|   |           |           |           |
|---|-----------|-----------|-----------|
| C | -0.418386 | 0.663281  | 0.141582  |
| C | -1.496130 | 1.493665  | -0.181332 |
| C | -0.684904 | -0.692577 | 0.381346  |
| C | -1.982791 | -1.192838 | 0.307898  |
| C | -2.797304 | 0.991098  | -0.255955 |
| C | -3.065096 | -0.360521 | -0.014758 |
| H | -2.160866 | -2.248596 | 0.503500  |
| C | -4.467473 | -0.915020 | -0.119429 |
| H | -1.319144 | 2.550214  | -0.372774 |
| H | -3.616264 | 1.661822  | -0.507621 |
| C | 0.996633  | 1.214692  | 0.252969  |
| H | 0.137698  | -1.360841 | 0.624392  |
| H | -4.610395 | -1.469918 | -1.056492 |
| H | -5.216440 | -0.116532 | -0.095046 |
| H | -4.687946 | -1.608487 | 0.700576  |
| C | 2.005418  | 0.440906  | -0.560044 |
| H | 1.292092  | 1.246422  | 1.308722  |
| H | 0.986865  | 2.260482  | -0.086970 |
| C | 3.131954  | -0.159748 | -0.144143 |
| C | 3.633802  | -0.176596 | 1.279905  |
| C | 4.023183  | -0.885129 | -1.125955 |
| H | 4.141506  | -1.941982 | -0.847443 |
| H | 5.034017  | -0.452967 | -1.137296 |
| H | 3.626211  | -0.845345 | -2.145210 |
| H | 3.790641  | -1.208917 | 1.622461  |
| H | 2.957153  | 0.310774  | 1.985830  |
| H | 4.609542  | 0.324284  | 1.352113  |
| H | 1.761888  | 0.372312  | -1.621252 |

Statistical Thermodynamic Analysis

Temperature= 298.150 Kelvin Pressure= 1.00000 Atm

---

---

SCF Energy= -466.901455254 Predicted Change= -3.719157D-08  
Zero-point correction (ZPE)= -466.6551 0.24630  
Internal Energy (U)= -466.6422 0.25924  
Enthalpy (H)= -466.6412 0.26019  
Gibbs Free Energy (G)= -466.6963 0.20510

---

Frequencies -- 21.3677 36.1636 48.3462  
 $\Delta G_{\text{Solvation}} = -0.00262043399999357$

### $\gamma$ -Product:

---

Using Gaussian 03: EM64L-G03RevE.01 11-Sep-2007

---

# b3lyp/gen gfpint gfinput scf=(direct,tight,maxcycle=300,xqc)  
opt=(maxcycle=250) freq=noraman  
#N Geom=AllCheck Guess=Read SCRF=Check GenChk RB3LYP/ChkBas Freq

---

Pointgroup= C1 Stoichiometry= C12H16 C1[X(C12H16)] #Atoms= 28  
Charge = 0 Multiplicity = 1

---

SCF Energy= -466.888865594 Predicted Change= -4.168447D-10

---

Optimization completed. {Found 2 times}

| Item  | Max Val. | Criteria | Pass?   | RMS Val. | Criteria | Pass?   |
|-------|----------|----------|---------|----------|----------|---------|
| Force | 0.00000  | 0.00045  | [ YES ] | 0.00000  | 0.00030  | [ YES ] |
| Displ | 0.00156  | 0.00180  | [ YES ] | 0.00156  | 0.00180  | [ YES ] |

---

| Atomic Type | Coordinates (Angstroms) |   |   |
|-------------|-------------------------|---|---|
|             | X                       | Y | Z |

---

|   |           |           |           |
|---|-----------|-----------|-----------|
| C | -0.125222 | 0.213696  | 0.013463  |
| C | 0.449791  | -1.058129 | 0.176842  |
| C | 0.746934  | 1.293058  | -0.167978 |
| C | 2.132914  | 1.109974  | -0.181668 |
| C | 1.829773  | -1.238675 | 0.164609  |
| C | 2.702147  | -0.155532 | -0.017607 |
| H | 2.780325  | 1.972802  | -0.324337 |
| C | 4.199117  | -0.359275 | -0.055190 |
| H | -0.198463 | -1.920601 | 0.307251  |
| H | 2.238005  | -2.239111 | 0.295220  |
| C | -1.659255 | 0.368179  | 0.080653  |
| H | 0.357960  | 2.297261  | -0.299838 |
| H | 4.536871  | -1.008915 | 0.760996  |
| H | 4.734632  | 0.592072  | 0.028851  |
| H | 4.515627  | -0.832983 | -0.994084 |

|   |           |           |           |
|---|-----------|-----------|-----------|
| C | -2.287568 | -0.670488 | -0.838331 |
| C | -2.129412 | 1.754040  | -0.420411 |
| C | -2.110782 | 0.200701  | 1.548219  |
| C | -3.161203 | -1.624834 | -0.512673 |
| H | -1.973252 | -0.584044 | -1.879872 |
| H | -1.798905 | 1.946903  | -1.447345 |
| H | -1.753379 | 2.561925  | 0.217304  |
| H | -3.223358 | 1.798273  | -0.403519 |
| H | -3.517700 | -1.773807 | 0.502726  |
| H | -3.557558 | -2.301604 | -1.265176 |
| H | -1.828854 | -0.778868 | 1.947285  |
| H | -3.197815 | 0.310056  | 1.640385  |
| H | -1.637541 | 0.964357  | 2.174582  |

---

Statistical Thermodynamic Analysis

Temperature= 298.150 Kelvin      Pressure= 1.00000 Atm

---

SCF Energy= -466.888865594      Predicted Change= -4.168447D-10

Zero-point correction (ZPE)= -466.6424 0.24643

Internal Energy (U)= -466.6299 0.25893

Enthalpy (H)= -466.6289 0.25988

Gibbs Free Energy (G)= -466.6814 0.20742

---

Frequencies -- 35.7079                      41.2865                      87.3352

$\Delta G_{\text{Solvation}} = -0.00246640799997522$



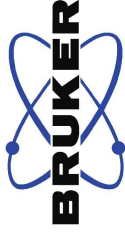

Current Data Parameters  
NAME YY-3-246  
EXPNO 1  
PROCNO 1

F2 - Acquisition Parameters  
Date\_ 20121104  
Time 17.34  
INSTRUM spect  
PROBHD 5 mm BBO BB-1H  
PULPROG zg30  
TD 65536  
SOLVENT CDCl3  
NS 32  
DS 0  
SWH 8278.146 Hz  
FIDRES 0.126314 Hz  
AQ 3.9583745 sec  
RG 20.2  
DW 60.400 usec  
DE 6.00 usec  
TE 297.2 K  
D1 1.00000000 sec  
TD0 1

==== CHANNEL f1 =====  
NUC1 1H  
P1 15.07 usec  
PL1 0 dB  
SFO1 400.1324710 MHz  
F2 - Processing parameters  
SI 65536  
SF 400.1300091 MHz  
WDW EM  
SSB 0  
LB 0.30 Hz  
GB 0  
PC 1.00

7.260  
7.160  
7.138  
7.131  
6.917  
6.910  
6.905  
6.894  
6.889  
6.882  
5.96  
5.93  
5.90  
5.886  
5.82  
5.78  
5.75  
5.71  
5.68  
5.64  
5.60  
5.56  
5.53  
5.50  
5.48  
5.45  
5.42  
5.34  
5.24  
5.165  
5.157  
5.153  
5.141  
5.04  
5.04  
5.02  
5.00  
1.776

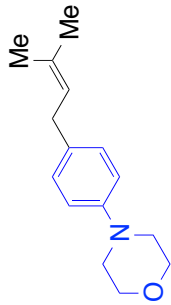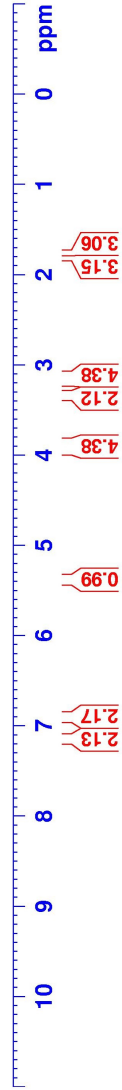

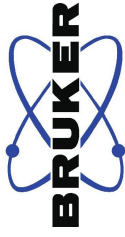

Current Data Parameters  
NAME YY-3-246  
EXPNO 2  
PROCNO 1

F2 - Acquisition Parameters

Date\_ 20121104  
Time 17.38  
INSTRUM spect  
PROBHD 5 mm BBO BB-1H  
PULPROG zgpg30  
TD 85536  
SOLVENT CDCl3  
NS 33  
DS 0  
SWH 23980.814 Hz  
FIDRES 0.365918 Hz  
AQ 1.3664256 sec  
RG 8192  
DW 20.850 usec  
DE 6.00 usec  
TE 297.2 K  
D1 2.0000000 sec  
d11 0.0300000 sec  
DELTA 1.8999998 sec  
TD0 1  
SFO1 100.6228298 MHz  
NUC1 13C  
P1 8.75 usec  
PLW1 -1.0000000 W  
SFO2 400.1316005 MHz  
NUC2 1H  
CPDPRG2 waltz16  
PCPD2 90.00 usec  
PLW2 -1.0000000 W  
PLW12 -1.0000000 W  
PLW13 -1.0000000 W

F2 - Processing parameters  
SI 65536  
SF 100.6127738 MHz  
EM

WDW 0  
SSB 0  
LB 1.00 Hz  
GB 0  
PC 1.40

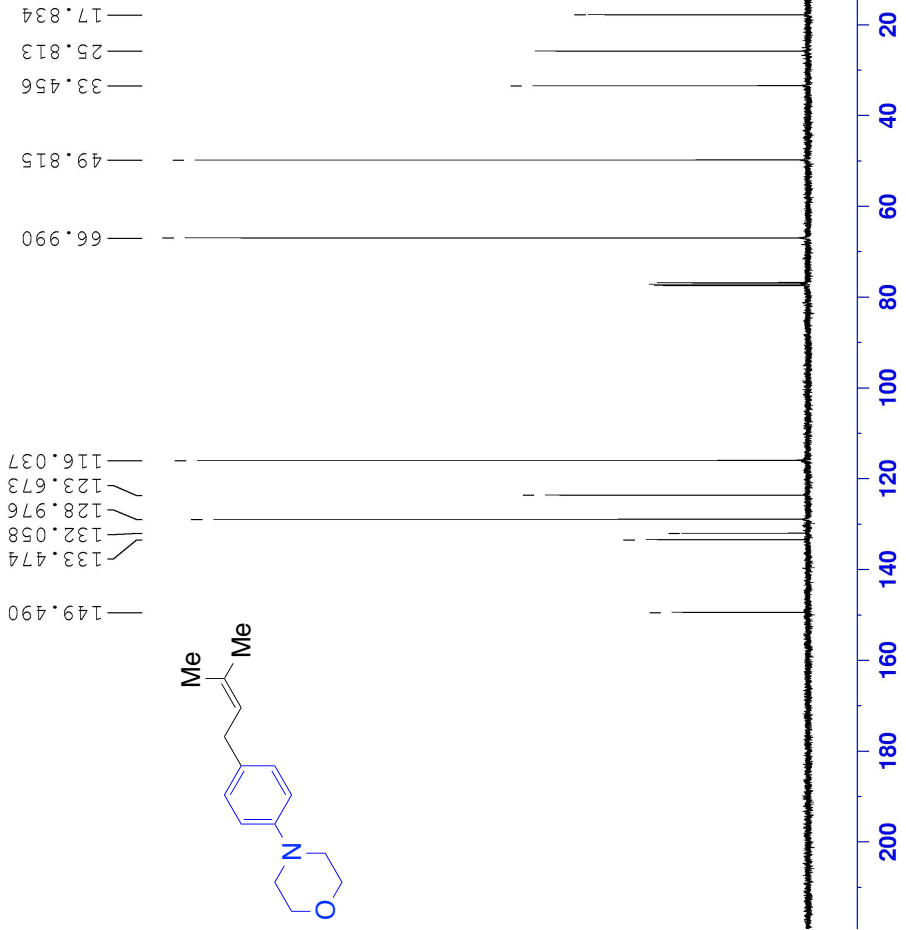

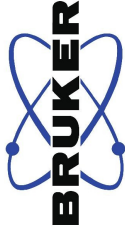

Current Data Parameters  
NAME YY-4-40  
EXPNO 1  
PROCNO 1

F2 - Acquisition Parameters  
Date\_ 20121130  
Time 17.04  
INSTRUM spect  
PROBHD 5 mm PABBO BB/  
PULPROG zg30  
TD 65336  
SOLVENT CDCl3  
NS 16  
DS 0  
SWH 8012.820 Hz  
FIDRES 0.122266 Hz  
AQ 4.0894465 sec  
RG 57  
DW 62.400 usec  
DE 6.50 usec  
TE 298.1 K  
D1 1.00000000 sec  
TD0 1

==== CHANNEL f1 =====  
SFO1 400.1324710 MHz  
NUC1 1H  
PI 14.50 usec  
PLW1 10.0000000 W

F2 - Processing parameters  
SI 65536  
SF 400.1300094 MHz  
WDW EM  
SSB 0  
LB 0.30 Hz  
GB 0  
PC 1.00

7.816  
7.812  
7.801  
7.796  
7.350  
7.332  
7.314  
7.297  
7.260  
5.347  
5.344  
5.341  
5.329  
5.326  
5.322  
5.314  
5.311  
5.307  
5.304  
3.392  
3.374

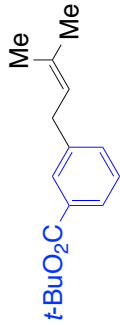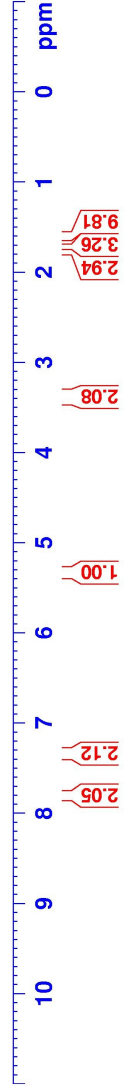

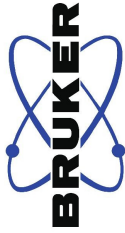

Current Data Parameters  
NAME YY-3-236 13C  
EXPNO 2  
PROCNO 1

F2 - Acquisition Parameters

Date\_ 20121102  
Time 15.20  
INSTRUM spect  
PROBHD 5 mm BBO BB-1H  
PULPROG zgpg30  
TD 65336  
SOLVENT CDCl3  
NS 171  
DS 0  
SWH 23980.814 Hz  
FIDRES 0.365918 Hz  
AQ 1.3864256 sec  
RG 8192  
DW 20.850 usec  
DE 6.00 usec  
TE 297.2 K  
D1 2.0000000 sec  
d11 0.0300000 sec  
DELTA 1.8999999 sec  
TD0 1  
SFO1 100.6228298 MHz  
NUC1 13C  
PI 8.75 usec  
PLW1 -1.0000000 W  
SFO2 400.1316005 MHz  
NUC2 1H  
CPDPRG2 waltz16  
PCPD2 90.00 usec  
PLW2 -1.0000000 W  
PLW12 -1.0000000 W  
PLW13 -1.0000000 W

F2 - Processing parameters  
SI 65536  
SF 100.6127696 MHz  
EM

WDW 0  
SSB 0  
LB 1.00 Hz  
GB 0  
PC 1.40

165.906  
141.919  
132.929  
132.460  
132.060  
129.307  
128.183  
126.905  
122.731  
80.706  
34.178  
28.180  
25.738  
17.839

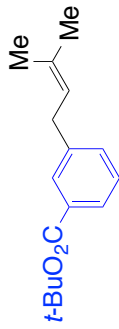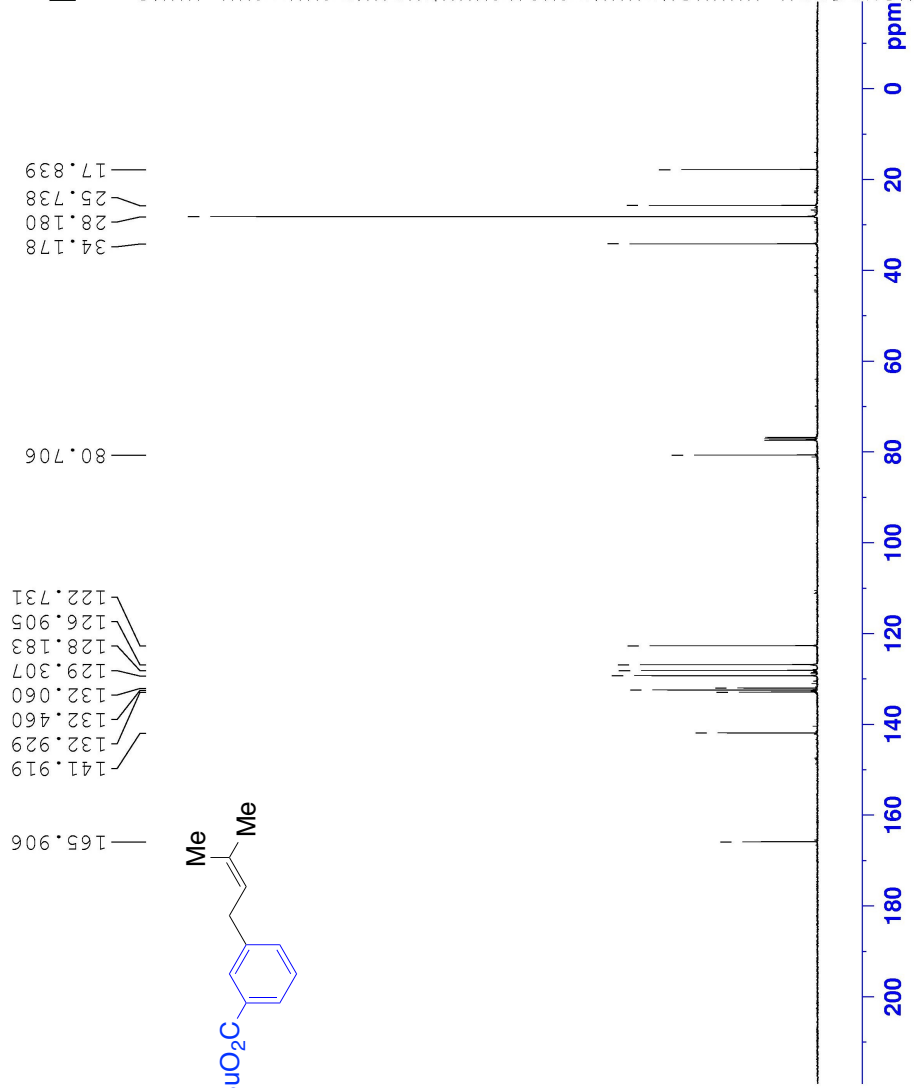



Current Data Parameters  
NAME YY-3-244  
EXPNO 1  
PROCNO 1

F2 - Acquisition Parameters  
Date\_ 20121103  
Time 18.00  
INSTRUM spect  
PROBHD 5 mm BBO BB-1H  
PULPROG zg30  
TD 65336  
SOLVENT CDCl3  
NS 32  
DS 0  
SWH 8278.146 Hz  
FIDRES 0.126314 Hz  
AQ 3.9583745 sec  
RG 12.7  
DW 60.400 usec  
DE 6.00 usec  
TE 297.2 K  
D1 1.00000000 sec  
TD0 1

==== CHANNEL f1 =====  
NUC1 1H  
P1 15.07 usec  
PL1 0 dB  
SFO1 400.1324710 MHz

F2 - Processing Parameters  
SI 65536  
SF 400.1300086 MHz  
WDW EM  
SSB 0  
LB 0.30 Hz  
GB 0  
PC 1.00

7.187  
5.254  
5.250  
5.242  
5.238  
5.235  
5.226  
5.223  
3.590  
3.575  
3.410  
3.393  
3.376  
3.359  
3.342  
3.325  
3.308  
3.094  
3.076  
3.059  
3.042  
3.025  
1.953  
1.869  
1.867  
1.458

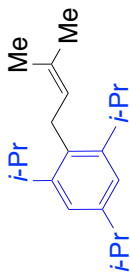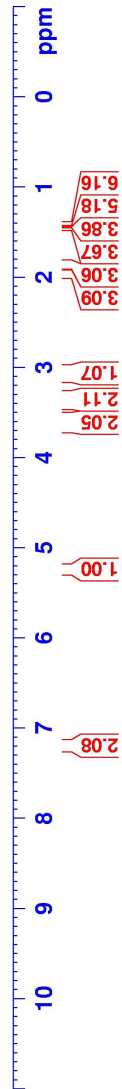



Current Data Parameters  
NAME YY-3-244  
EXPNO 2  
PROCNO 1

F2 - Acquisition Parameters  
Date\_ 20121103  
Time 18.03  
INSTRUM spect  
PROBHD 5 mm BBO BB-1H  
PULPROG zgpg30  
TD 65336  
SOLVENT CDCl3  
NS 33  
DS 0  
SWH 23980.814 Hz  
FIDRES 0.365918 Hz  
AQ 1.3864256 sec  
RG 8192  
DW 20.850 usec  
DE 6.00 usec  
TE 297.2 K  
D1 2.00000000 sec  
d11 0.03000000 sec  
DELTA 1.89999998 sec  
TD0 1  
SFO1 100.6228298 MHz  
NUC1 13C  
PI 8.75 usec  
PLW1 -1.00000000 W  
SFO2 400.1316005 MHz  
NUC2 1H  
CPDPRG2 waltz16  
PCPD2 90.00 usec  
PLW2 -1.00000000 W  
PLW12 -1.00000000 W  
PLW13 -1.00000000 W

F2 - Processing parameters  
SI 65536  
SF 100.6127693 MHz  
WDW EM  
SSB 0  
LB 1.00 Hz  
GB 0  
PC 1.40

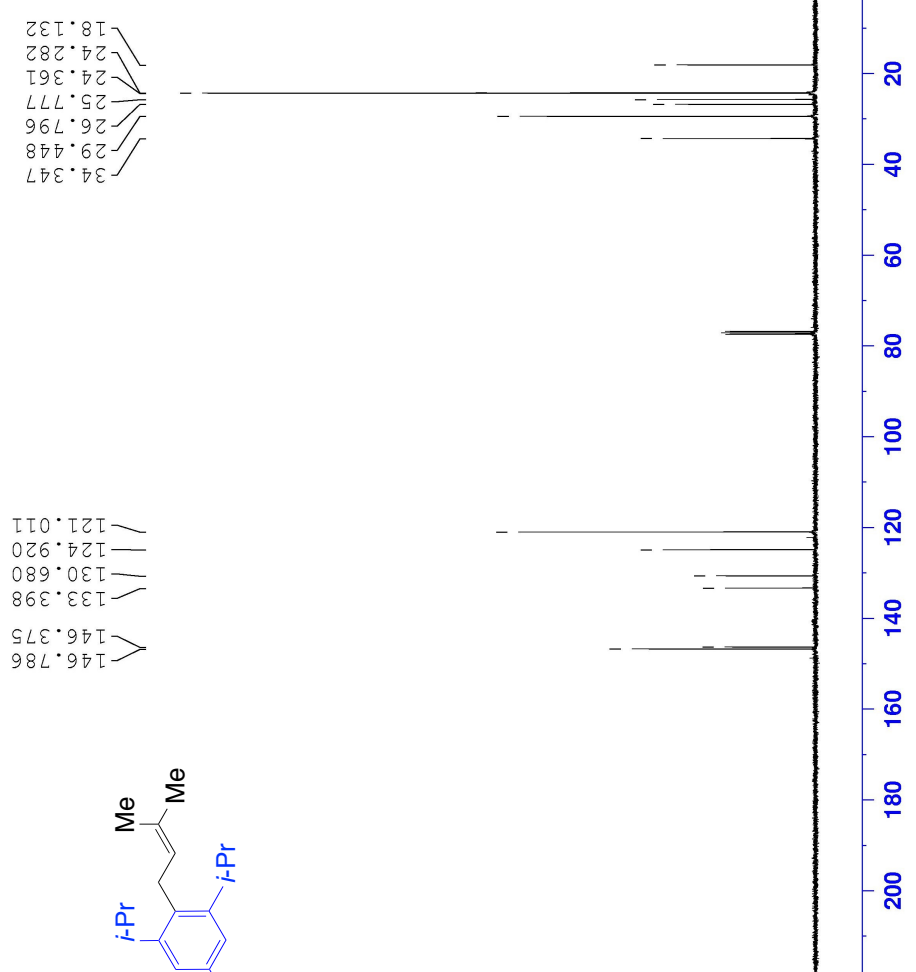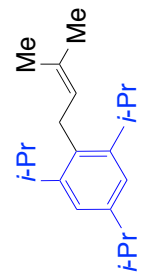



Current Data Parameters  
NAME YY-3-293  
EXPNO 1  
PROCNO 1

F2 - Acquisition Parameters  
Date\_ 20121126  
Time 7.48  
INSTRUM spect  
PROBHD 5 mm BBO BB-1H  
PULPROG zg30  
TD 65536  
SOLVENT CDCl3  
NS 16  
DS 0  
SWH 8278.146 Hz  
FIDRES 0.126314 Hz  
AQ 3.9583745 sec  
RG 22.6  
DW 60.400 usec  
DE 6.00 usec  
TE 297.2 K  
D1 2.0000000 sec  
TD0 1

==== CHANNEL f1 =====  
NUC1 1H  
P1 15.07 usec  
PL1 0 dB  
SFO1 400.1324710 MHz  
F2 - Processing parameters  
SI 65536  
SF 400.1300091 MHz  
WDW EM  
SSB 0  
LB 0.30 Hz  
GB 0  
PC 1.00

7.111  
7.104  
7.099  
7.088  
7.082  
7.075  
7.039  
7.031  
7.026  
7.015  
7.010  
6.803  
6.900  
6.91  
6.988  
6.984  
6.981  
6.977  
6.973  
6.970  
6.966  
6.962  
6.958  
6.955  
6.951  
6.948  
6.942  
6.923  
6.813  
6.810  
1.777

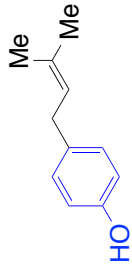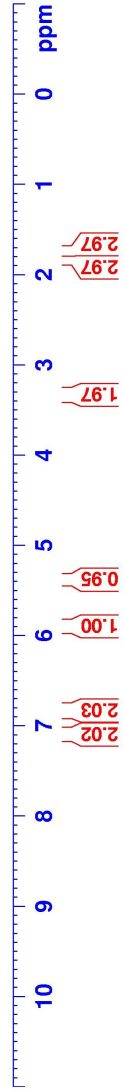

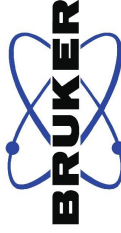

Current Data Parameters  
NAME YY-3-254  
EXPNO 2  
PROCNO 1

F2 - Acquisition Parameters  
Date\_ 20121106  
Time 10.33  
INSTRUM spect  
PROBHD 5 mm BBO BB-1H  
PULPROG zgpg30  
TD 65536  
SOLVENT CDCl3  
NS 33  
DS 0  
SWH 23980.814 Hz  
FIDRES 0.365918 Hz  
AQ 1.3664256 sec  
RG 18390.4  
DW 20.850 usec  
DE 6.00 usec  
TE 297.2 K  
D1 2.0000000 sec  
d11 0.0300000 sec  
DELTA 1.8999998 sec  
TD0 1  
SFO1 100.6228298 MHz  
NUC1 13C  
P1 8.75 usec  
PLW1 -1.0000000 W  
SFO2 400.1316005 MHz  
NUC2 1H  
CPDPRG12 waltz16  
PCPD2  
PLW2 -1.0000000 W  
PLW12 -1.0000000 W  
PLW13 -1.0000000 W

F2 - Processing parameters  
SI 65536  
SF 100.6127702 MHz  
EM  
WDW 0  
SSB 0  
LB 1.00 Hz  
GB 0  
EC 1.40

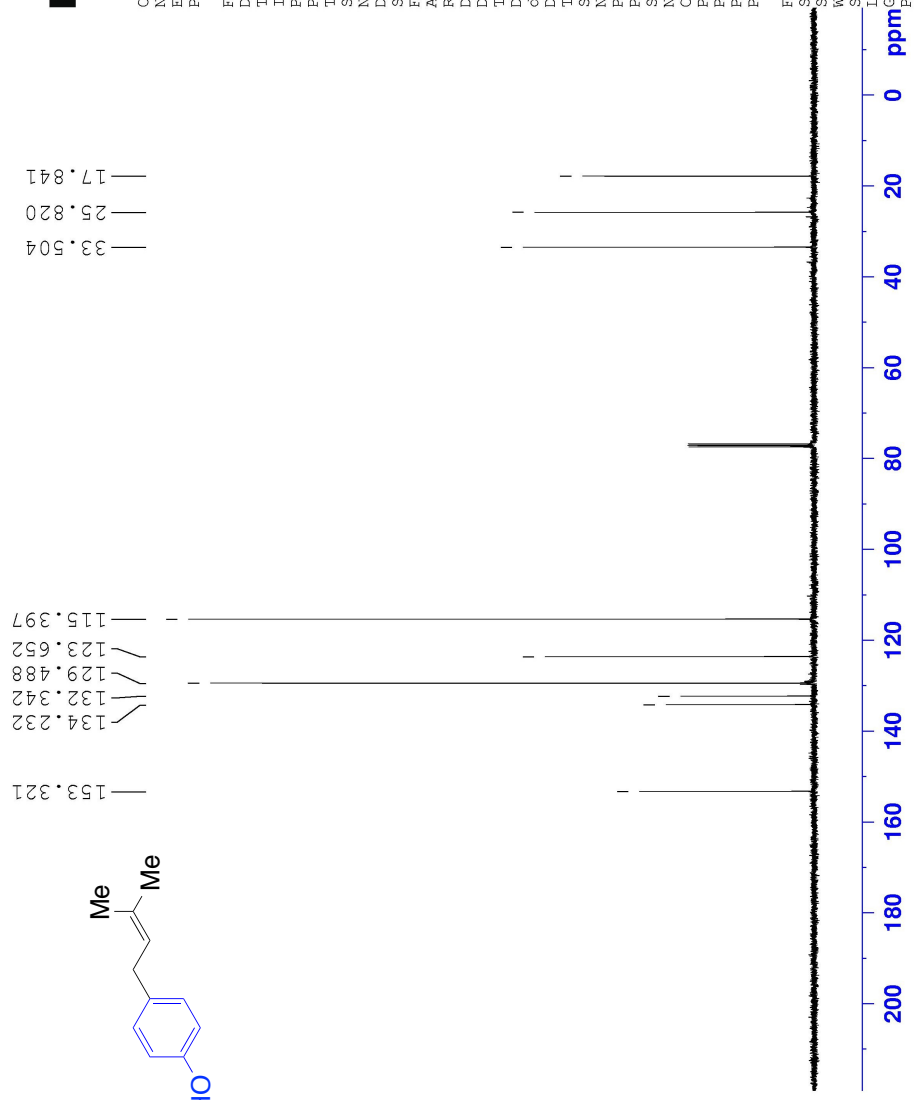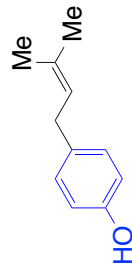





Current Data Parameters  
NAME YY-3-288  
EXPNO 1  
PROCNO 1

F2 - Acquisition Parameters  
Date\_ 20121117  
Time 9.24  
INSTRUM spect  
PROBHD 5 mm BBO BB-1H  
PULPROG zg30  
TD 65536  
SOLVENT CDCl3  
NS 16  
DS 0  
SWH 8278.146 Hz  
FIDRES 0.126314 Hz  
AQ 3.9583745 sec  
RG 28.5  
DW 60.400 usec  
DE 6.00 usec  
TE 297.2 K  
D1 2.0000000 sec  
TD0 1

==== CHANNEL f1 =====  
NUC1 1H  
P1 15.07 usec  
PL1 0 dB  
SFO1 400.1324710 MHz  
F2 - Processing parameters  
SI 65536  
SF 400.1300092 MHz  
WDW EM  
SSB 0  
LB 0.30 Hz  
GB 0  
PC 1.00

8.429  
7.437  
7.416  
7.260  
7.100  
7.079  
5.322  
5.319  
5.316  
5.312  
5.304  
5.301  
5.297  
5.290  
5.286  
5.282  
5.279  
3.306  
3.288  
2.120  
1.753  
1.716

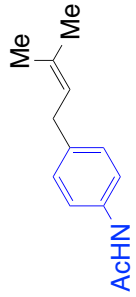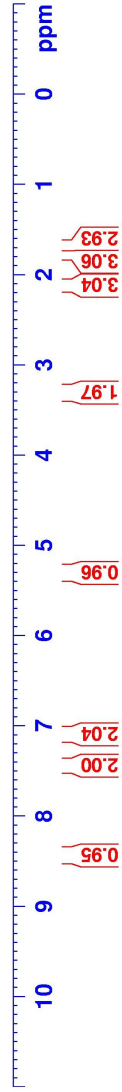

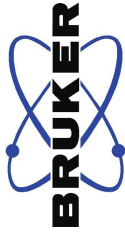

Current Data Parameters  
NAME YY-3-255  
EXPNO 2  
PROCNO 1

F2 - Acquisition Parameters  
Date\_ 20121106  
Time 18.47  
INSTRUM spect  
PROBHD 5 mm BBO BB-1H  
PULPROG zgpg30  
TD 65536  
SOLVENT CDCl3  
NS 33  
DS 0  
SWH 23980.814 Hz  
FIDRES 0.365918 Hz  
AQ 1.3864256 sec  
RG 8192  
DW 20.850 usec  
DE 6.00 usec  
TE 297.2 K  
D1 2.00000000 sec  
d11 0.03000000 sec  
DELTA 1.89999998 sec  
TD0 1  
SFO1 100.6228298 MHz  
NUC1 13C  
PI 8.75 usec  
PLW1 -1.00000000 W  
SFO2 400.1316005 MHz  
NUC2 1H  
CPDPRG2 waltz16  
PCPD2 90.00 usec  
PLW2 -1.00000000 W  
PLW12 -1.00000000 W  
PLW13 -1.00000000 W

F2 - Processing parameters  
SI 65536  
SF 100.6127740 MHz  
WDW EM  
SSB 0  
LB 1.00 Hz  
GB 0  
PC 1.40

17.788  
24.201  
25.732  
33.749

120.500  
123.145  
128.577  
132.462  
135.921  
137.736

169.204

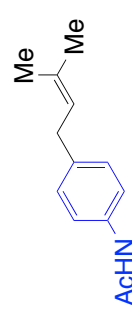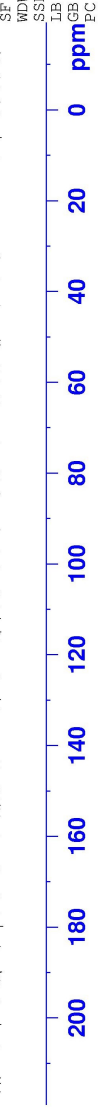



Current Data Parameters  
NAME YY-3-297  
EXPNO 1  
PROCNO 1

F2 - Acquisition Parameters  
Date\_ 20121126  
Time 20.43  
INSTRUM spect  
PROBHD 5 mm PABBO BB/  
PULPROG zg30  
TD 65336  
SOLVENT CDCl3  
NS 16  
DS 0  
SWH 8012.820 Hz  
FIDRES 0.122266 Hz  
AQ 4.0894465 sec  
RG 12.25  
DW 62.400 usec  
DE 6.50 usec  
TE 298.1 K  
D1 1.0000000 sec  
TD0 1

==== CHANNEL f1 =====  
SFO1 400.1324710 MHz  
NUC1 1H  
PI 14.50 usec  
PLW1 10.0000000 W  
F2 - Processing Parameters  
SI 65536  
SF 400.1300092 MHz  
WDW EM  
SSB 0  
LB 0.30 Hz  
GB 0  
PC 1.00

8.120  
8.100  
8.030  
7.622  
7.607  
7.407  
7.217  
7.214  
7.196  
7.193  
6.566  
6.557  
5.463  
5.460  
5.448  
5.445  
5.442  
5.430  
5.426  
3.503  
3.485  
1.828  
1.816  
1.722

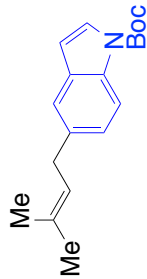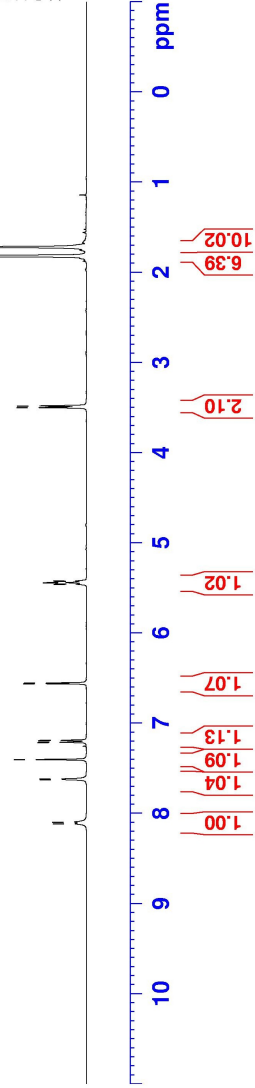

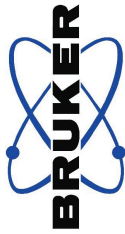

Current Data Parameters  
NAME YY-3-297\_13C  
EXPNO 1  
PROCNO 1

F2 - Acquisition Parameters

Date\_ 20130621  
Time 17.53  
INSTRUM spect  
PROBHD 5 mm PABBO BB/  
PULPROG zgpg30  
TD 65536  
SOLVENT CDC13  
NS 9  
DS 0  
SWH 24038.461 Hz  
FIDRES 0.366798 Hz  
AQ 1.3631488 sec  
RG 203  
DW 20.800 usec  
DE 6.50 usec  
TE 298.3 K  
D1 1.00000000 sec  
D11 0.03000000 sec  
TD0 1

==== CHANNEL f1 =====  
SFO1 100.6228293 MHz  
NUC1 13C  
P1 10.00 usec  
PLW1 49.00000000 W

==== CHANNEL f2 =====  
SFO2 400.1316005 MHz  
NUC2 1H  
CPDPRG[2] waltz16  
PCPD2 90.00 usec  
PLW2 15.00000000 W  
PLW12 0.31876999 W  
PLW13 0.25819999 W

F2 - Processing parameters  
SI 32768  
SF 100.6127747 MHz  
WDW EM  
SSB 0 1.00 Hz  
LB 0  
GB 0  
PC 1.40

149.832  
136.207  
133.659  
132.058  
130.904  
125.954  
124.947  
123.959  
120.176  
115.008  
107.243  
83.371  
34.280  
28.198  
25.834  
17.867

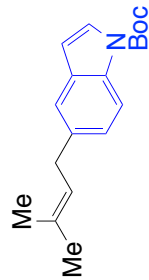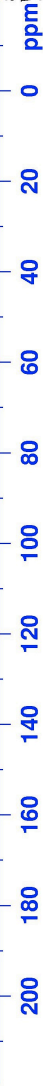





Current Data Parameters  
NAME YY-3-268 Fr2  
EXPNO 2  
PROCNO 1

F2 - Acquisition Parameters

Date\_ 20121109  
Time 10.32  
INSTRUM spect  
PROBHD 5 mm BBO BB-1H  
PULPROG zgpg30  
TD 65536  
SOLVENT CDCl3  
NS 128  
DS 0  
SWH 23980.814 Hz  
FIDRES 0.365918 Hz  
AQ 1.3664256 sec  
RG 18390.4  
DW 20.850 usec  
DE 6.00 usec  
TE 297.2 K  
d1 2.0000000 sec  
d11 0.0300000 sec  
DELTA 1.8999998 sec  
TD0 1  
SF01 100.6228298 MHz  
NUC1 13C  
P1 8.75 usec  
PL1 -1.0000000 W  
SF02 400.1316005 MHz  
NUC2 1H  
CPDPRG12 waltz16  
PCPD2  
PLW2 -1.0000000 W  
PLW12 -1.0000000 W  
PLW13 -1.0000000 W

F2 - Processing parameters  
SI 65536  
SF 100.6127684 MHz  
EM  
WDW 0  
SSB 0  
LB 1.00 Hz  
GB 0  
EC 1.40

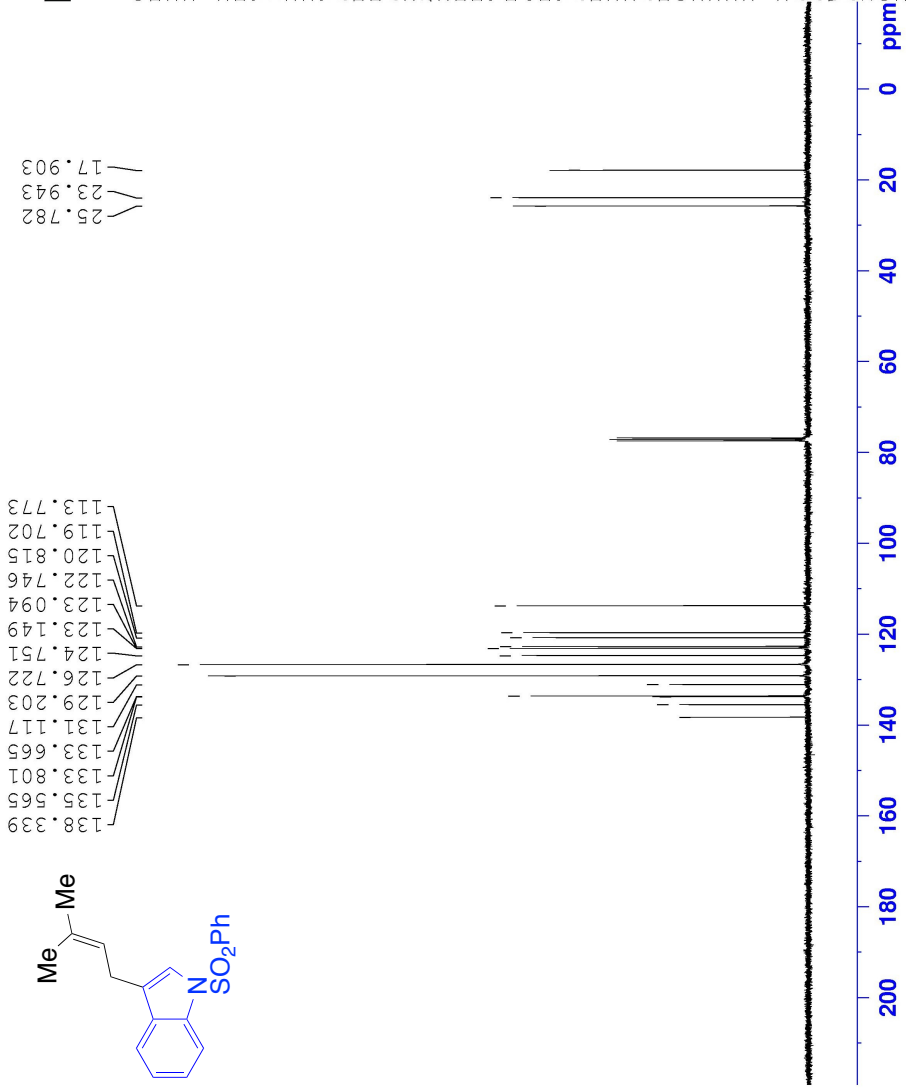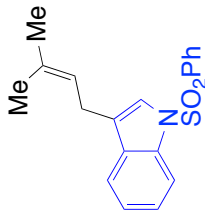



Current Data Parameters  
NAME YY-3-235  
EXPNO 1  
PROCNO 1

F2 - Acquisition Parameters

Date\_ 20121101  
Time 0.02  
INSTRUM spect  
PROBHD 5 mm BBO BB-1H  
PULPROG zg30  
TD 65536  
SOLVENT CDCl3  
NS 17  
DS 2  
SWH 8278.146 Hz  
FIDRES 0.126314 Hz  
AQ 3.9583745 sec  
RG 362  
DW 60.400 usec  
DE 6.00 usec  
TE 297.2 K  
D1 1.0000000 sec  
TD0 1

==== CHANNEL f1 =====  
NUC1 1H  
P1 15.07 usec  
PL1 0 dB  
SFO1 400.1324710 MHz

F2 - Processing parameters  
SI 65536  
SF 400.1300095 MHz  
WDW EM  
SSB 0  
LB 0.30 Hz  
GB 0  
PC 1.00

10.730  
8.014  
8.011  
7.920  
7.386  
7.378  
7.371  
6.513  
6.508  
6.505  
6.500  
5.221  
5.203  
5.185  
3.373  
3.355  
1.699  
1.645

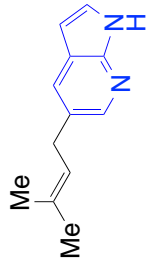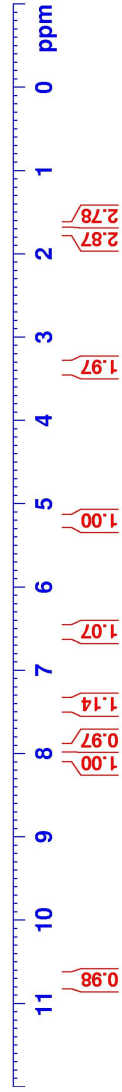

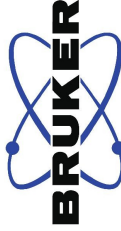

Current Data Parameters  
NAME YY-3-235\_13C 600M  
EXPNO 2  
PROCNO 1

F2 - Acquisition Parameters  
Date\_ 20121102  
Time 15.43  
INSTRUM spect  
PROBHD 5 mm CPTXI 1H-  
PULPROG zgpg30  
TD 65536  
SOLVENT CDCl3  
NS 6  
DS 4  
SWH 35971.223 Hz  
FIDRES 0.548877 Hz  
AQ 0.9109504 sec  
RG 29193  
DW 13.900 usec  
DE 6.00 usec  
TE 293.0 K  
D1 2.0000000 sec  
d11 0.0300000 sec  
DELTA 1.8999998 sec  
TD0 1  
SFO1 150.9178988 MHz  
NUC1 13C  
P1 22.20 usec  
PLW1 -1.0000000 W  
SFO2 600.1324005 MHz  
NUC2 1H  
CPDPRG12 waltz16  
PCPD2 70.00 usec  
PLW2 -1.0000000 W  
PLW12 -1.0000000 W  
PLW13 -1.0000000 W

F2 - Processing parameters  
SI 65536  
SF 150.9028259 MHz  
EM  
WDW 0  
SSB 0  
LB 1.00 Hz  
GB 0  
EC 1.40

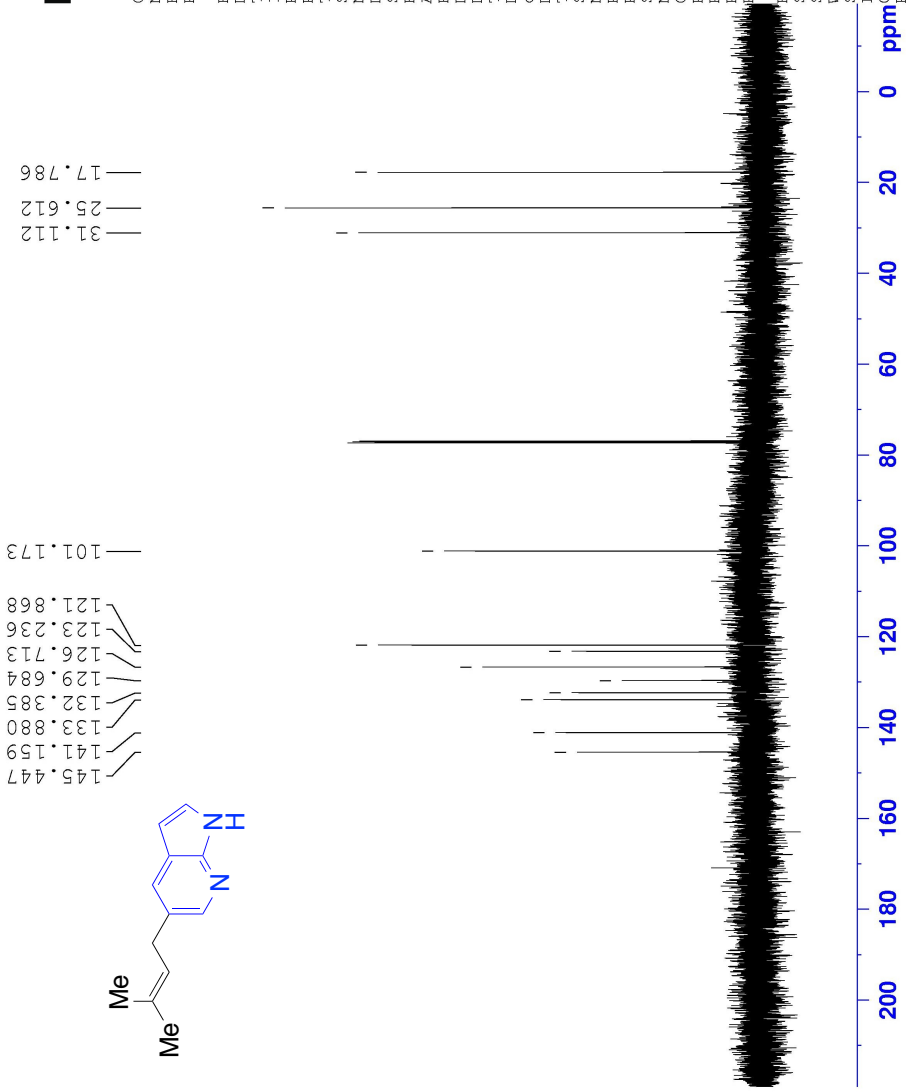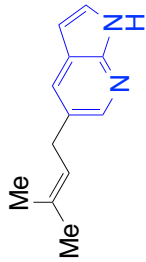



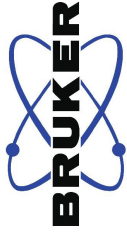

Current Data Parameters  
NAME YY-3-278  
EXPNO 1  
PROCNO 1

F2 - Acquisition Parameters  
Date\_ 20121112  
Time\_ 10.51  
INSTRUM spect  
PROBHD 5 mm BBO BB-1H  
PULPROG zg30  
TD 65336  
SOLVENT CDCl3  
NS 16  
DS 0  
SWH 8278.146 Hz  
FIDRES 0.126314 Hz  
AQ 3.9583745 sec  
RG 35.9  
DW 60.400 usec  
DE 6.00 usec  
TE 297.2 K  
D1 1.00000000 sec  
TD0 1

==== CHANNEL f1 =====  
NUC1 1H  
P1 15.07 usec  
PL1 0 dB  
SFO1 400.1324710 MHz

F2 - Processing parameters  
SI 65336  
SF 400.1300094 MHz  
WDW EM  
SSB 0  
LB 0.30 Hz  
GB 0  
PC 1.00

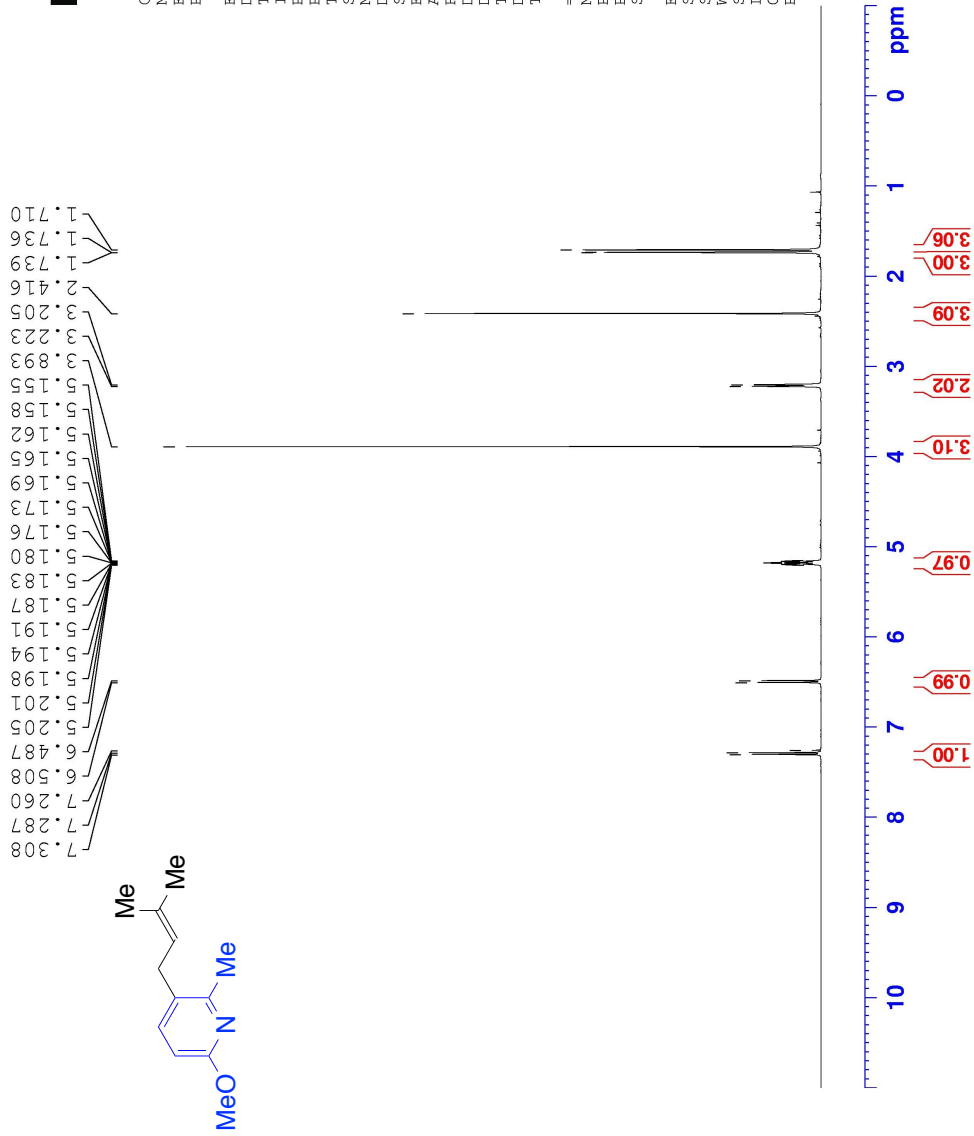

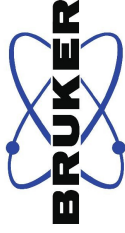

Current Data Parameters  
NAME YY-3-278  
EXPNO 2  
PROCNO 1

F2 - Acquisition Parameters

Date\_ 20121112  
Time 10.53  
INSTRUM spect  
PROBHD 5 mm BBO BB-1H  
PULPROG zgpg30  
TD 65536  
SOLVENT CDCl3  
NS 128  
DS 0  
SWH 23980.814 Hz  
FIDRES 0.365918 Hz  
AQ 1.3664256 sec  
RG 8192  
DE 20.850 usec  
TE 297.2 K  
D1 2.00000000 sec  
d11 0.03000000 sec  
DELTA 1.89999998 sec  
TDO 1  
SF01 100.6228298 MHz  
NUC1 13C  
P1 8.75 usec  
PLW1 -1.00000000 W  
SF02 400.1316005 MHz  
NUC2 1H  
CPDPRG12 waltz16  
PCPD2 90.00 usec  
PLW2 -1.00000000 W  
PLW12 -1.00000000 W  
PLW13 -1.00000000 W

F2 - Processing parameters  
SI 65536  
SF 100.6127606 MHz  
WDW EM  
SSB 0  
LB 0  
GB 0  
FC 1.40

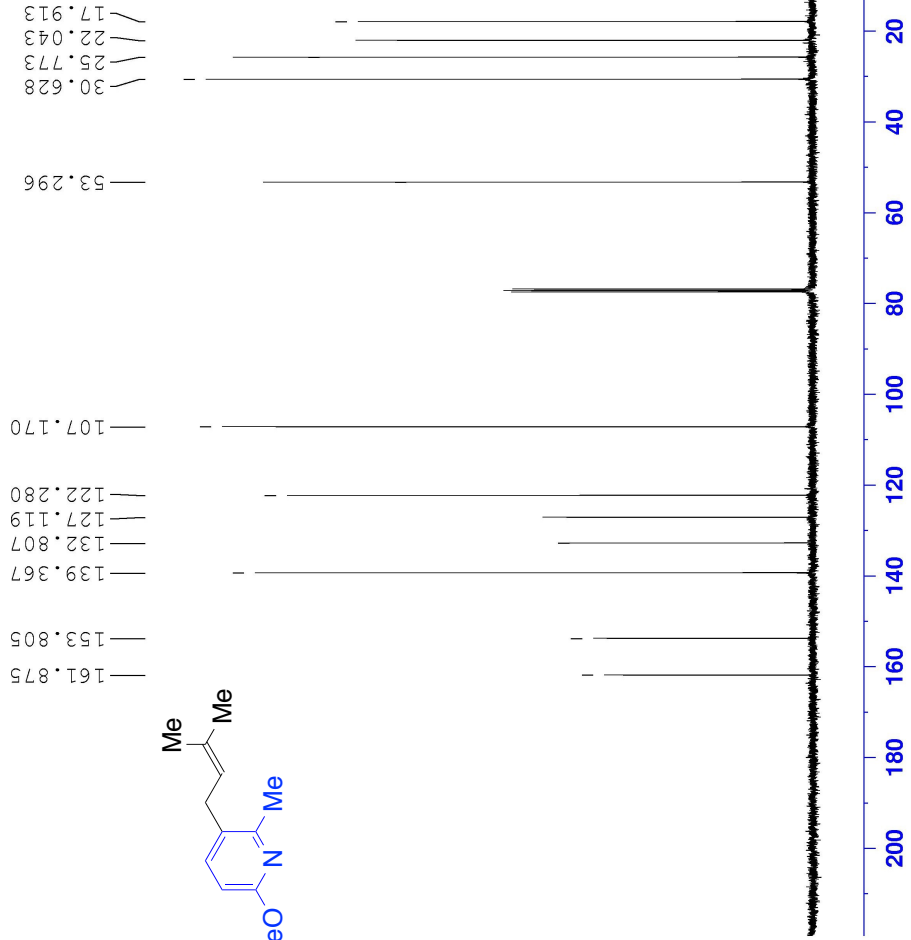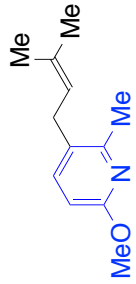

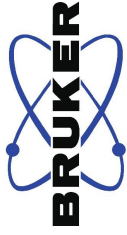

Current Data Parameters  
NAME YY-3-276  
EXPNO 1  
PROCNO 1

F2 - Acquisition Parameters  
Date\_ 20121112  
Time\_ 19.36  
INSTRUM spect  
PROBHD 5 mm BBO BB-1H  
PULPROG zg30  
TD 65336  
SOLVENT CDCl3  
NS 16  
DS 0  
SWH 8278.146 Hz  
FIDRES 0.126314 Hz  
AQ 3.9583745 sec  
RG 18  
DW 60.400 usec  
DE 6.00 usec  
TE 297.2 K  
D1 1.00000000 sec  
TD0 1

==== CHANNEL f1 =====  
NUC1 1H  
P1 15.07 usec  
PL1 0 dB  
SFO1 400.1324710 MHz  
F2 - Processing parameters  
SI 65336  
SF 400.1300093 MHz  
WDW EM  
SSB 0  
LB 0.30 Hz  
GB 0  
PC 1.00

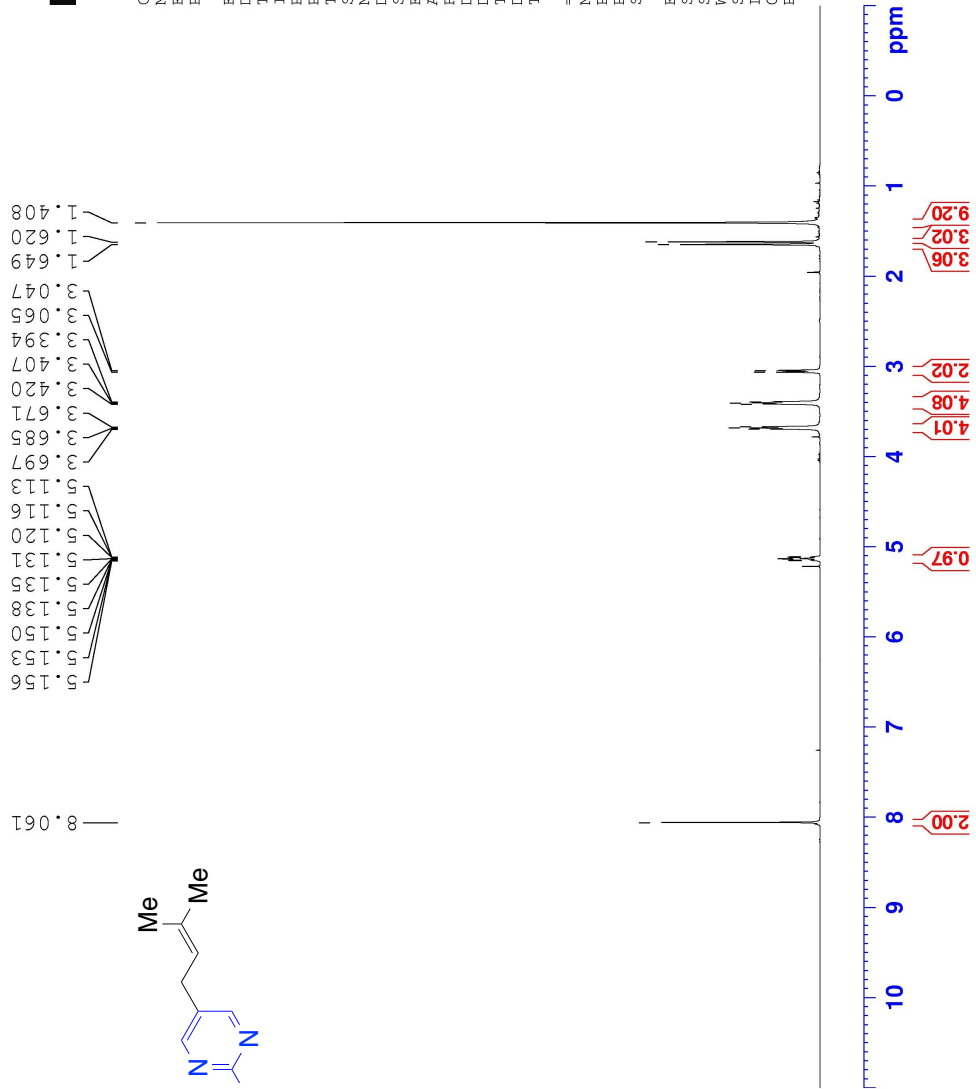



Current Data Parameters  
NAME YY-3-276  
EXPNO 3  
PROCNO 1

F2 - Acquisition Parameters  
Date\_ 20121112  
Time 19.40  
INSTRUM spect  
PROBHD 5 mm BBO BB-1H  
PULPROG zgpg30  
TD 65536  
SOLVENT  
NS 79  
DS 0  
SWH 23980.814 Hz  
FIDRES 0.365918 Hz  
AQ 1.3664256 sec  
RG 18390.4  
DW 20.850 usec  
DE 6.00 usec  
TE 297.2 K  
D1 1.00000000 sec  
d11 0.03000000 sec  
DELTA 0.89999998 sec  
TD0 1  
SFO1 100.6228298 MHz  
NUC1 13C  
P1 8.75 usec  
PLW1 -1.00000000 W  
SFO2 400.1316005 MHz  
NUC2 1H  
CPDPRG12 waltz16  
PCPD2 90.00 usec  
PLW2 -1.00000000 W  
PLW12 -1.00000000 W  
PLW13 -1.00000000 W

F2 - Processing parameters  
SI 65536  
SF 100.6127668 MHz  
WDW EM  
SSB 0  
LB 1.00 Hz  
GB 0  
PC 1.40

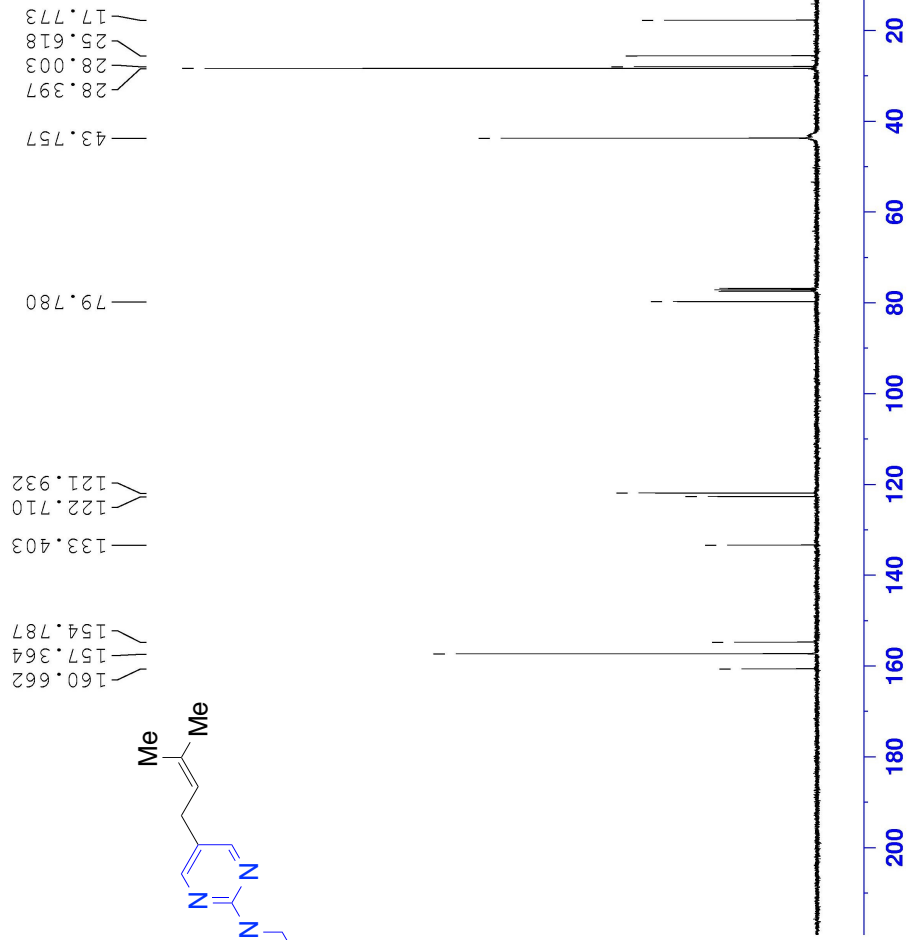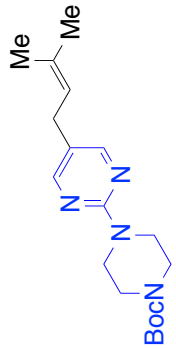

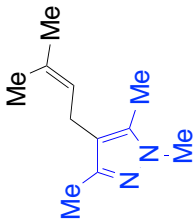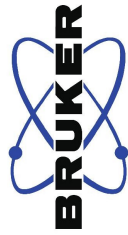

Current Data Parameters  
 NAME YY-3-253  
 EXPNO 1  
 PROCNO 1

F2 - Acquisition Parameters  
 Date\_ 20121105  
 Time 21.03  
 INSTRUM spect  
 PROBHD 5 mm BBO BB-1H  
 PULPROG zg30  
 TD 65836  
 SOLVENT CDCl3  
 NS 32  
 DS 0  
 SWH 8278.146 Hz  
 FIDRES 0.126314 Hz  
 AQ 3.9583745 sec  
 RG 22.6  
 DW 60.400 usec  
 DE 6.00 usec  
 TE 297.2 K  
 DL 1.00000000 sec  
 TDO 1

==== CHANNEL f1 =====  
 NUC1 1H  
 P1 15.07 usec  
 PL1 0 dB  
 SFO1 400.1324710 MHz

F2 - Processing Parameters  
 SI 65536  
 SF 400.1300100 MHz  
 EM  
 WDW 0  
 SSB 0  
 LB 0.30 Hz  
 GB 0  
 PC 1.00

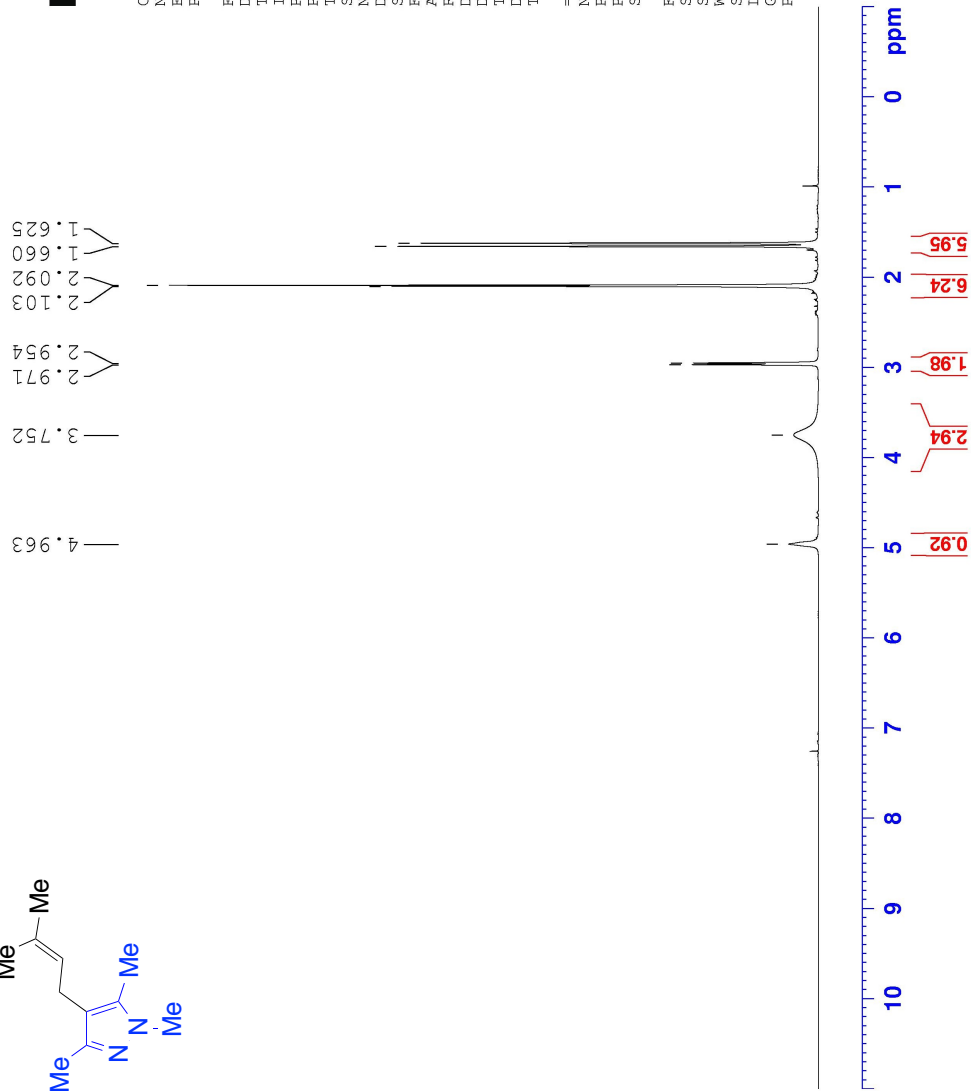



Current Data Parameters  
NAME YY-3-253  
EXPNO 2  
PROCNO 1

F2 - Acquisition Parameters

Date\_ 20121105  
Time 21.14  
INSTRUM spect  
PROBHD 5 mm BBO BB-1H  
PULPROG zgpg30  
TD 65336  
SOLVENT CDCl3  
NS 339  
DS 0  
SWH 23980.814 Hz  
FIDRES 0.365918 Hz  
AQ 1.3864256 sec  
RG 16384  
DW 20.850 usec  
DE 6.00 usec  
TE 297.2 K  
D1 5.0000000 sec  
d11 0.0300000 sec  
DELTA 4.9000010 sec  
TD0 1  
SFO1 100.6228298 MHz  
NUC1 13C  
PI 8.75 usec  
PLW1 -1.0000000 W  
SFO2 400.1316005 MHz  
NUC2 1H  
CPDPRG2 waltz16  
PCPD2 90.00 usec  
PLW2 -1.0000000 W  
PLW12 -1.0000000 W  
PLW13 -1.0000000 W

F2 - Processing parameters  
SI 65536  
SF 100.6127731 MHz  
EM

WDW 0  
SSB 0  
LB 1.00 Hz  
GB 0  
PC 1.40

9.620  
11.747  
17.686  
22.311  
25.509  
36.091

116.063  
122.597  
131.024

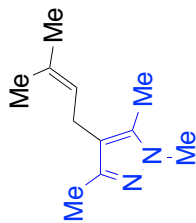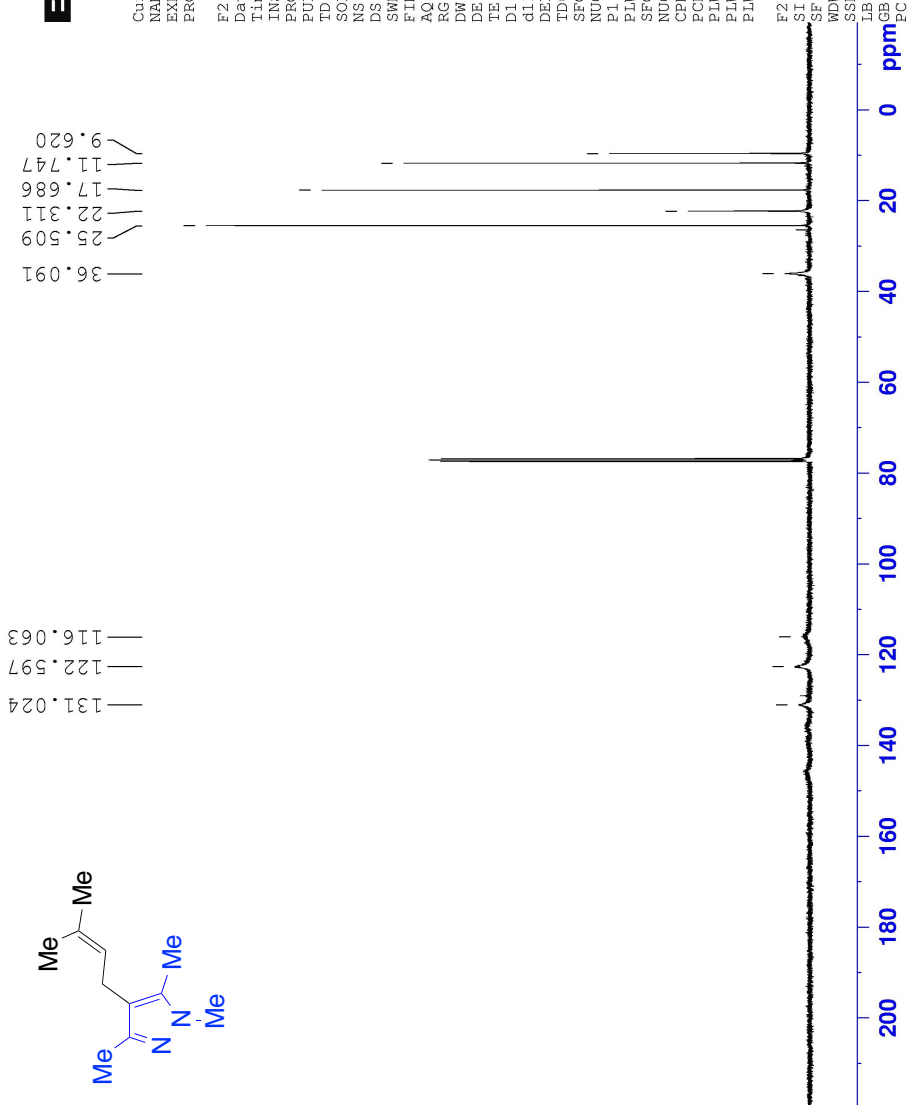



Current Data Parameters  
NAME YY-3-299  
EXPNO 1  
PROCNO 1

F2 - Acquisition Parameters  
Date\_ 20121127  
Time 9.17  
INSTRUM spect  
PROBHD 5 mm PABBO BB/  
PULPROG zg30  
TD 65336  
SOLVENT CDCl3  
NS 16  
DS 0  
SWH 8012.820 Hz  
FIDRES 0.122266 Hz  
AQ 4.0894465 sec  
RG 30.66  
DW 62.400 usec  
DE 6.50 usec  
TE 298.1 K  
DL 1.0000000 sec  
TD0 1

==== CHANNEL f1 =====  
SFO1 400.1324710 MHz  
NUC1 1H  
PI 14.50 usec  
PLW1 10.0000000 W  
F2 - Processing parameters  
SI 65536  
SF 400.1300092 MHz  
WDW EM  
SSB 0  
LB 0.30 Hz  
GB 0  
PC 1.00

7.260  
6.919  
6.915  
6.792  
6.788  
6.772  
6.768  
6.755  
6.755  
6.735  
6.327  
6.288  
6.073  
6.057  
6.040  
6.034  
6.017  
6.001  
5.959  
5.934  
5.256  
5.253  
5.250  
5.246  
5.238  
5.235  
5.231  
5.224  
5.220  
5.217  
5.213  
2.909  
2.892  
2.875  
1.771  
1.688

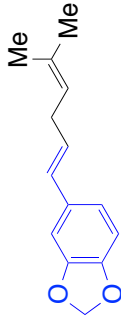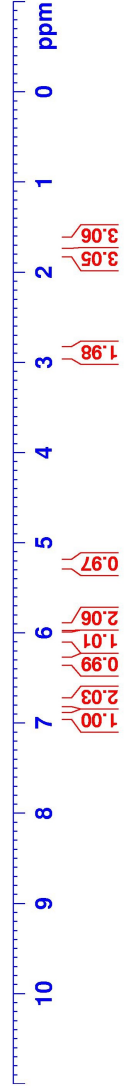

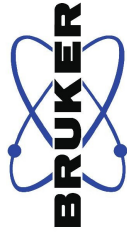

Current Data Parameters  
NAME YY-3-241 13C 600M  
EXPNO 2  
PROCNO 1

F2 - Acquisition Parameters  
Date\_ 20121102  
Time 16.19  
INSTRUM spect  
PROBHD 5 mm CPTXI 1H-  
PULPROG zgpg30  
TD 65336  
SOLVENT CDCl3  
NS 128  
DS 0  
SWH 35971.223 Hz  
FIDRES 0.548877 Hz  
AQ 0.9109504 sec  
RG 29193  
DW 13.900 usec  
DE 6.00 usec  
TE 293.0 K  
D1 2.0000000 sec  
d11 0.0300000 sec  
DELTA 1.8999999 sec  
TD0 1  
SFO1 150.9178988 MHz  
NUC1 13C  
PI 22.20 usec  
PLW1 -1.0000000 W  
SFO2 600.1324005 MHz  
NUC2 1H  
CPDPRG2 waltz16  
PCPD2 70.00 usec  
PLW2 -1.0000000 W  
PLW12 -1.0000000 W  
PLW13 -1.0000000 W

F2 - Processing parameters  
SI 65536  
SF 150.9028099 MHz  
EM  
WDW 0  
SSB 0  
LB 1.00 Hz  
GB 0  
PC 1.40

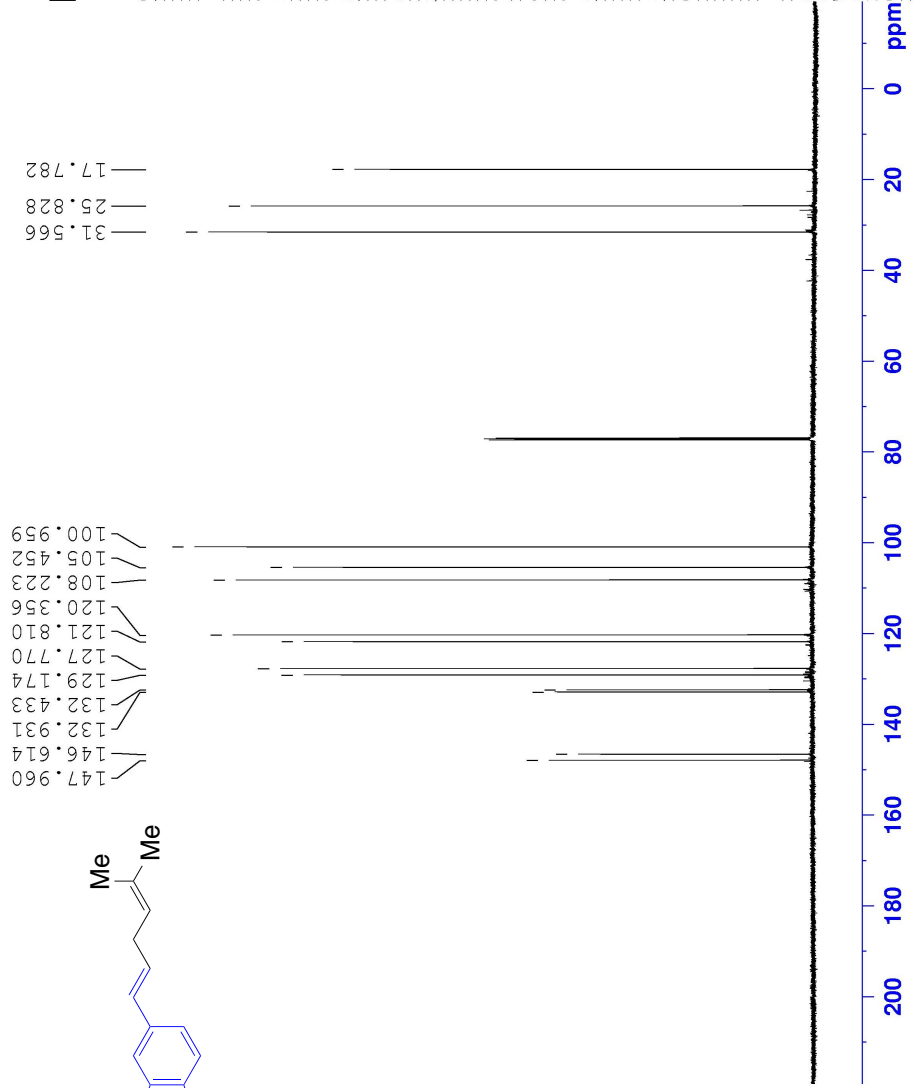



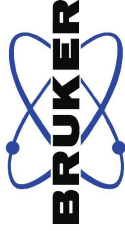

Current Data Parameters  
NAME YY-5-157  
EXPNO 1  
PROCNO 1

F2 - Acquisition Parameters  
Date\_ 20130611  
Time 15.14  
INSTRUM spect  
PROBHD 5 mm PABBO BB/  
PULPROG zg30  
TD 65536  
SOLVENT CDCl3  
NS 8  
DS 0  
SWH 8012.820 Hz  
FIDRES 0.122266 Hz  
AQ 4.0894465 sec  
RG 32  
DW 62.400 usec  
DE 6.50 usec  
TE 298.1 K  
D1 2.0000000 sec  
TD0 1

==== CHANNEL f1 =====  
SFO1 400.1324710 MHz  
NUC1 1H  
P1 13.12 usec  
PLW1 15.00000000 W  
F2 - Processing parameters  
SI 65536  
SF 400.1300089 MHz  
WDW EM  
SSB 0  
LB 0.30 Hz  
GB 0  
PC 1.00

7.381  
7.377  
7.362  
7.344  
7.302  
7.284  
7.283  
7.276  
7.272  
7.260  
7.254  
7.236  
7.573  
7.565  
7.284  
7.280  
7.267  
7.265  
7.262  
7.249  
7.247  
2.826  
2.821  
2.915  
2.759  
2.742  
2.335  
2.244  
2.239  
2.218  
2.208  
2.135  
2.128  
2.038  
2.031  
2.018  
2.012  
2.006  
2.001  
1.859  
1.845  
1.814  
1.720  
1.525

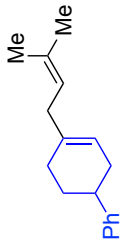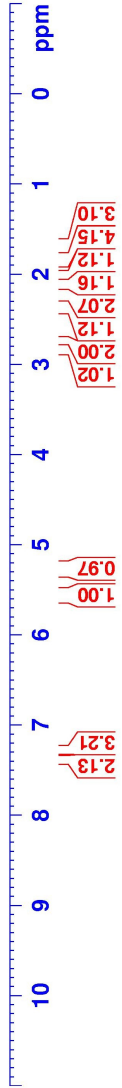



Current Data Parameters  
NAME YY-5-157  
EXPNO 2  
PROCNO 1

F2 - Acquisition Parameters

Date\_ 20130611  
Time 15.17  
INSTRUM spect  
PROBHD 5 mm PABBO BB/  
PULPROG zgpg30  
TD 65536  
SOLVENT CDCl3  
NS 32  
DS 0  
SWH 24038.461 Hz  
FIDRES 0.366798 Hz  
AQ 1.3631488 sec  
RG 203  
DW 20.800 usec  
DE 6.50 usec  
TE 298.1 K  
D1 1.00000000 sec  
D11 0.03000000 sec  
TD0 1

===== CHANNEL f1 =====  
SFO1 100.6228293 MHz  
NUC1 13C  
P1 10.00 usec  
PLW1 49.00000000 W

===== CHANNEL f2 =====  
SFO2 400.1316005 MHz  
NUC2 1H  
CPDPRG12 waltz16  
PCPD2 90.00 usec  
PLW2 15.00000000 W  
PLW12 0.31876999 W  
PLW13 0.25819999 W

F2 - Processing parameters

SI 32768  
SF 100.6127636 MHz  
WDW EM  
SSB 0  
LB 1.00 Hz  
GB 0  
PC 1.40

17.828  
25.936  
29.354  
30.277  
33.790  
36.364  
40.422

120.523  
122.406  
126.034  
127.019  
128.445  
132.655  
137.407  
147.469

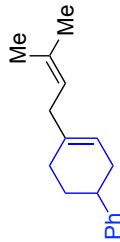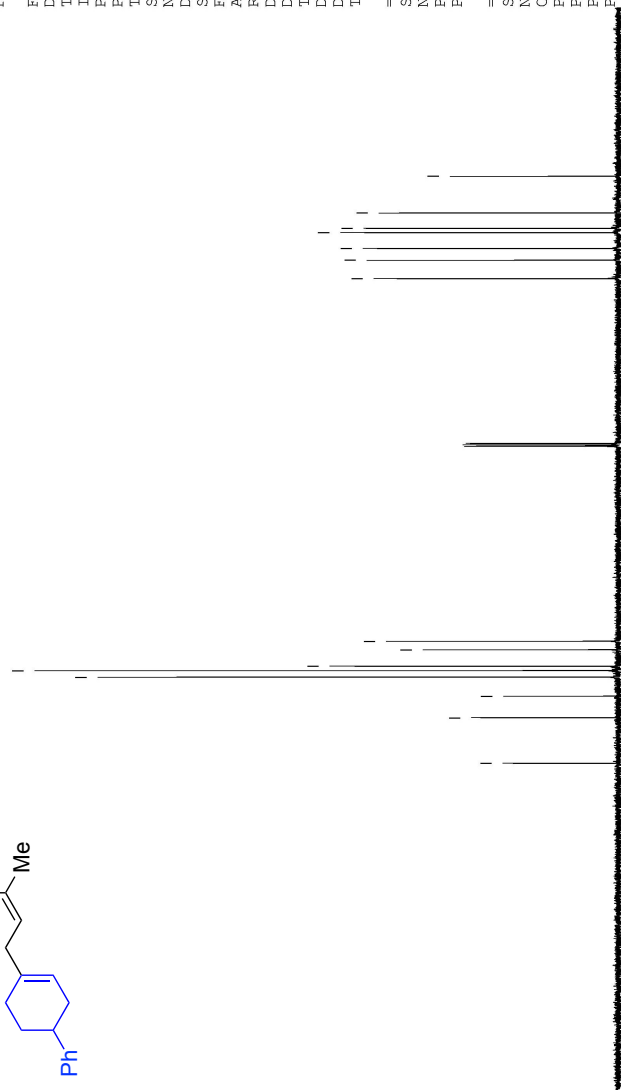

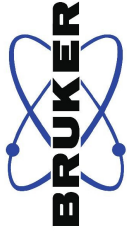

1.214  
1.232  
1.250  
1.250  
1.591  
1.633  
1.640  
1.648  
1.661  
1.664  
1.668  
1.677  
1.692  
1.955  
1.963  
1.970  
1.984  
2.000  
2.202  
2.215  
2.219  
2.440  
2.446  
2.453  
2.462  
2.468  
2.587  
2.605  
4.087  
4.104  
4.122  
4.140  
5.079  
5.082  
5.086  
5.094  
5.097  
5.101  
5.104  
5.108  
5.119  
5.356  
5.359  
5.363  
5.73

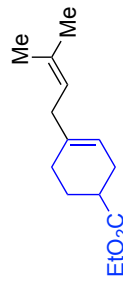

Current Data Parameters  
NAME YY-5-159 real  
EXPNO 1  
PROCNO 1  
F2 - Acquisition Parameters  
Date\_ 20130612  
Time\_ 17.15  
INSTRUM spect  
PROBHD 5 mm PABBO BB/  
PULPROG zg30  
TD 65336  
SOLVENT CDCl3  
NS 8  
DS 0  
SWH 8012.820 Hz  
FIDRES 0.122266 Hz  
AQ 4.0894465 sec  
RG 32  
DW 62.400 usec  
DE 6.50 usec  
TE 298.0 K  
D1 2.0000000 sec  
TD0 1  
===== CHANNEL f1 =====  
SFO1 400.1324710 MHz  
NUC1 1H  
P1 14.50 usec  
PL1 10.00000000 W  
F2 - Processing parameters  
SI 65336  
SF 400.1300100 MHz  
WDW EM  
SSB 0  
LB 0.30 Hz  
GB 0  
PC 1.00

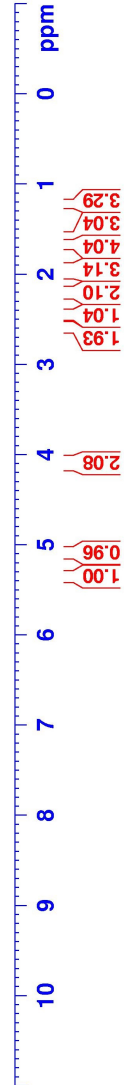



Current Data Parameters  
NAME YY-5-159 real  
EXPNO 2  
PROCNO 1

F2 - Acquisition Parameters  
Date\_ 20130612  
Time 17.17  
INSTRUM spect  
PROBHD 5 mm PABBO BB/  
PULPROG zgpg30  
TD 65336  
SOLVENT CDCl3  
NS 32  
DS 0  
SWH 24038.461 Hz  
FIDRES 0.366798 Hz  
AQ 1.3631488 sec  
RG 203  
DW 20.800 usec  
DE 6.50 usec  
TE 298.2 K  
D1 1.00000000 sec  
D11 0.03000000 sec  
TD0 1

==== CHANNEL f1 =====  
SFO1 100.6228293 MHz  
NUC1 13C  
P1 10.00 usec  
PLW1 44.00000000 W

==== CHANNEL f2 =====  
SFO2 400.1316005 MHz  
NUC2 1H  
PCPD2 waltz16  
PCPD2 90.00 usec  
PLW2 10.00000000 W  
PLW12 0.25957000 W  
PLW13 0.21025001 W

F2 - Processing parameters  
SI 32768  
SF 100.6127582 MHz  
WDW EM  
SSB 0  
LB 1.00 Hz  
GB 0  
PC 1.40

14.325  
17.738  
25.656  
25.832  
27.795  
27.897  
36.200  
39.581  
60.252

118.919  
122.091  
132.772  
137.084

176.122

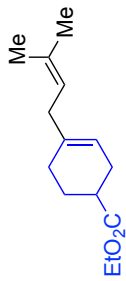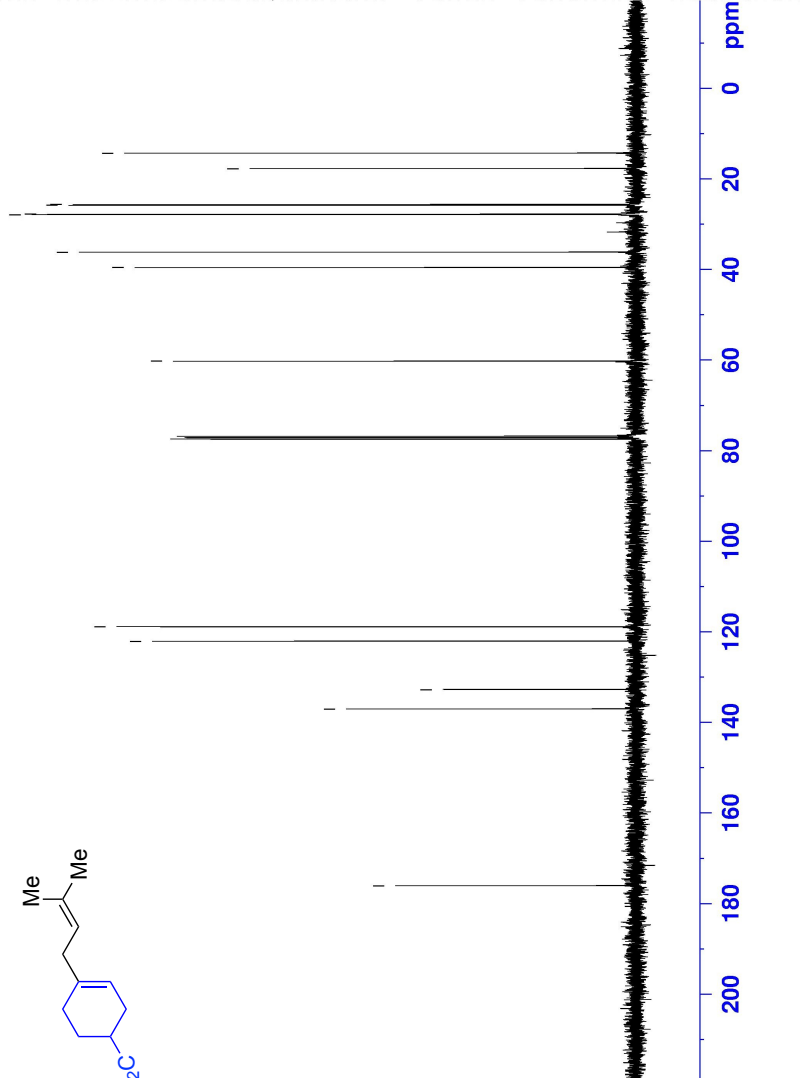



Current Data Parameters  
NAME YY-5-157  
EXPNO 1  
PROCNO 1

F2 - Acquisition Parameters  
Date\_ 20130611  
Time\_ 15.14  
INSTRUM spect  
PROBHD 5 mm PABBO BB/  
PULPROG zg30  
TD 65536  
SOLVENT CDCl3  
NS 8  
DS 0  
SWH 8012.820 Hz  
FIDRES 0.122266 Hz  
AQ 4.0894465 sec  
RG 32  
DW 62.400 usec  
DE 6.50 usec  
TE 298.1 K  
D1 2.0000000 sec  
TD0 1

==== CHANNEL f1 =====  
SFO1 400.1324710 MHz  
NUC1 1H  
P1 13.12 usec  
PL1 15.0000000 W

F2 - Processing parameters  
SI 65536  
SF 400.1300089 MHz  
WDW EM  
SSB 0  
LB 0.30 Hz  
GB 0  
PC 1.00

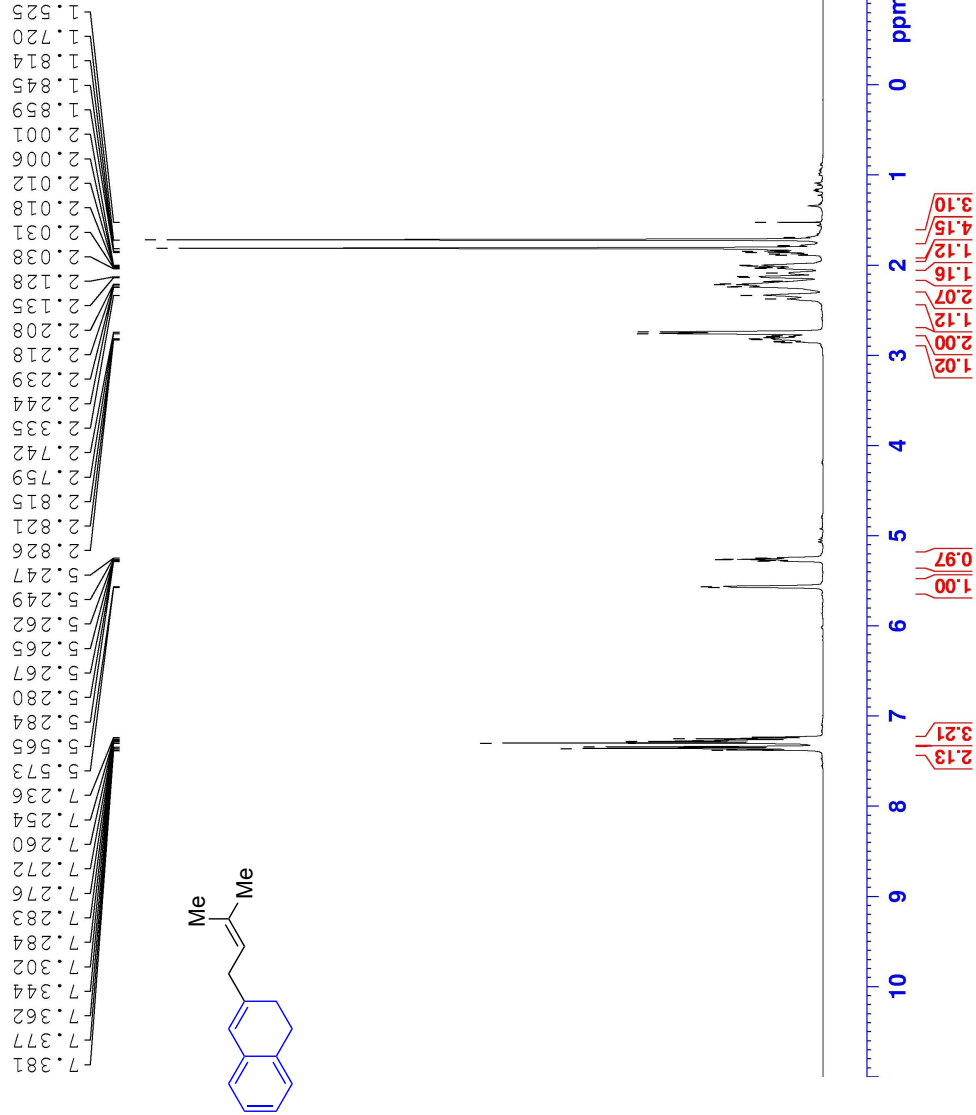



Current Data Parameters  
NAME YY-5-157  
EXPNO 2  
PROCNO 1

F2 - Acquisition Parameters

Date\_ 20130611  
Time 15.17  
INSTRUM spect  
PROBHD 5 mm PABBO BB/  
PULPROG zgpg30  
TD 65536  
SOLVENT CDCl3  
NS 32  
DS 0  
SWH 24038.461 Hz  
FIDRES 0.366798 Hz  
AQ 1.3631488 sec  
RG 203  
DW 20.800 usec  
DE 6.50 usec  
TE 298.1 K  
D1 1.00000000 sec  
D11 0.03000000 sec  
TD0 1

=====  
CHANNEL f1 =====  
SFO1 100.6228293 MHz  
NUC1 13C  
P1 10.00 usec  
PLW1 49.00000000 W

=====  
CHANNEL f2 =====  
SFO2 400.1316005 MHz  
NUC2 1H  
CPDPRG12 waltz16  
PCPD2 90.00 usec  
PLW2 15.00000000 W  
PLW12 0.31876999 W  
PLW13 0.25819999 W

F2 - Processing parameters

SI 32768  
SF 100.6127636 MHz  
WDW EM  
SSB 0  
LB 1.00 Hz  
GB 0  
PC 1.40

17.828  
25.936  
29.354  
30.277  
33.790  
36.364  
40.422

120.523  
122.406  
126.034  
127.019  
128.445  
132.655  
137.407  
147.469

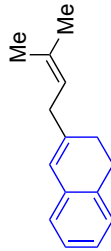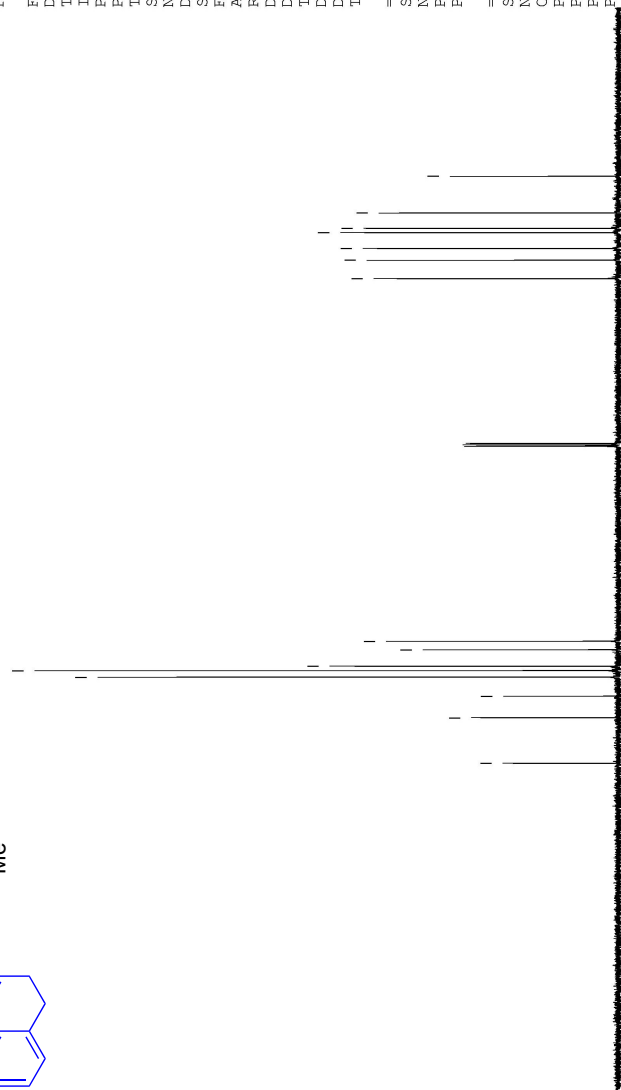



1.371  
1.385  
1.399  
1.414  
1.430  
1.444  
1.460  
1.474  
1.530  
1.642  
1.666  
1.705  
1.708  
1.722  
1.728  
1.742  
1.753  
1.759  
1.764  
1.772  
1.778  
1.897  
1.903  
1.938  
1.988  
2.689  
2.703  
2.716  
4.705  
4.707  
4.709  
4.711  
5.043  
5.046  
5.050  
5.053  
5.057  
5.061  
5.064  
5.068  
5.071  
5.079  
5.082  
5.086

Current Data Parameters  
NAME YY-5-158  
EXPNO 1  
PROCNO 1  
F2 - Acquisition Parameters  
Date\_ 20130611  
Time\_ 17.29  
INSTRUM spect  
PROBHD 5 mm PABBO BB/  
PULPROG zg30  
TD 65336  
SOLVENT CDCl3  
NS 8  
DS 0  
SWH 8012.820 Hz  
FIDRES 0.122266 Hz  
AQ 4.0894465 sec  
RG 32  
DW 62.400 usec  
DE 6.50 usec  
TE 298.0 K  
D1 2.0000000 sec  
TD0 1  
==== CHANNEL f1 =====  
SFO1 400.1324710 MHz  
NUC1 1H  
P1 14.50 usec  
PL1 10.00000000 W  
F2 - Processing parameters  
SI 65536  
SF 400.1300103 MHz  
WDW EM  
SSB 0  
LB 0.30 Hz  
GB 0  
PC 1.00

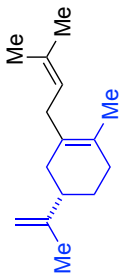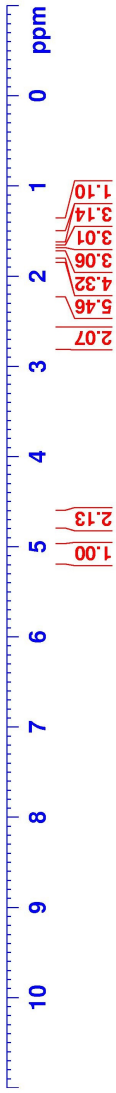



Current Data Parameters  
NAME YY-5-158  
EXPNO 3  
PROCNO 1

F2 - Acquisition Parameters  
Date\_ 20130611  
Time 17.30  
INSTRUM spect  
PROBHD 5 mm PABBO BB/  
PULPROG zgpg30  
TD 65836  
SOLVENT CDCl3  
NS 32  
DS 0  
SWH 24038.461 Hz  
FIDRES 0.366798 Hz  
AQ 1.3631488 sec  
RG 203  
DW 20.800 usec  
DE 6.50 usec  
TE 298.1 K  
D1 1.00000000 sec  
D11 0.03000000 sec  
TD0 1

==== CHANNEL f1 =====  
SFO1 100.6228293 MHz  
NUC1 13C  
P1 10.00 usec  
PLW1 44.00000000 W

==== CHANNEL f2 =====  
SFO2 400.1316005 MHz  
NUC2 1H  
PCPD2 waltz16  
PCPD2 90.00 usec  
PLW2 10.00000000 W  
PLW12 0.25957000 W  
PLW13 0.21025001 W

F2 - Processing parameters  
SI 32768  
SF 100.6127548 MHz  
WDW EM  
SSB 0  
LB 1.00 Hz  
GB 0  
PC 1.40

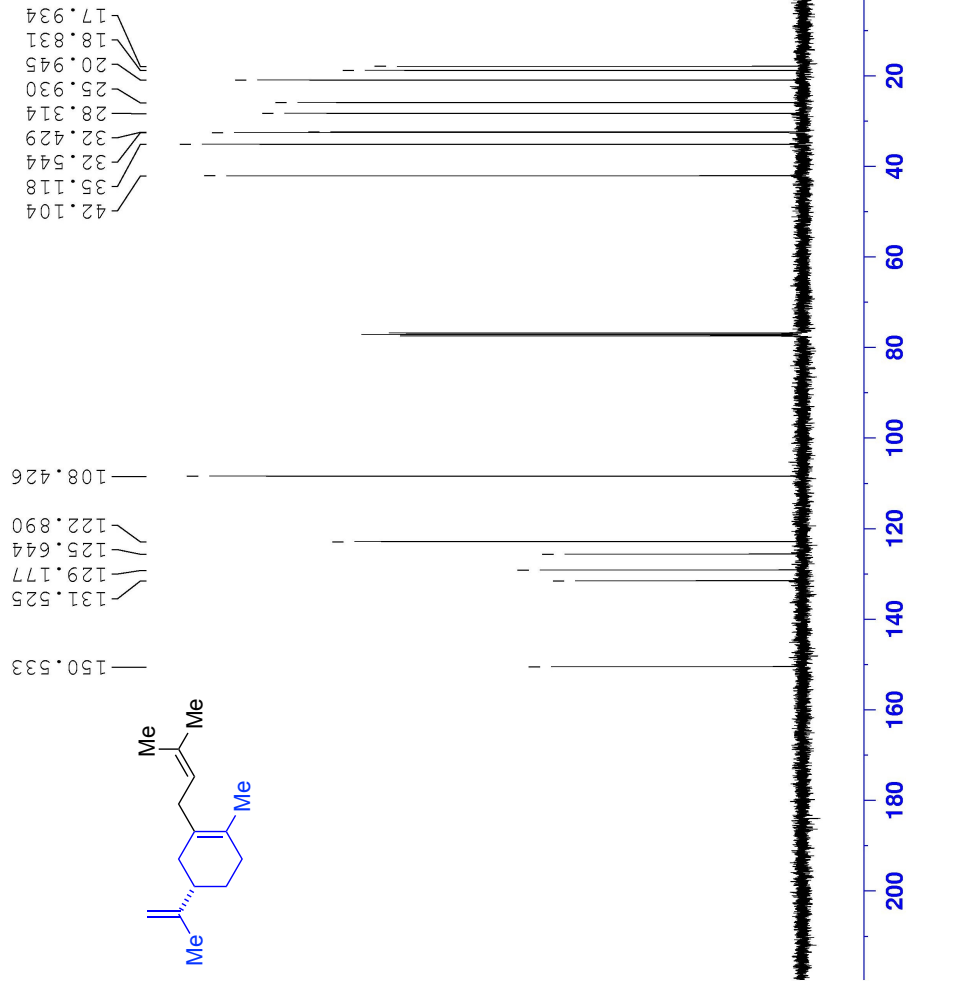





0.896  
0.911  
1.151  
1.151  
1.183  
1.214  
1.511  
1.528  
1.536  
1.545  
1.553  
1.569  
1.644  
1.721  
1.740  
1.741  
1.767  
1.891  
1.905  
1.920  
1.964  
1.979  
2.008  
2.213  
2.226  
2.259  
2.434  
2.687  
2.705  
4.746  
4.750  
4.758  
5.149  
5.153  
5.156  
5.168  
5.171  
5.174  
5.186  
5.189  
5.361  
5.368  
5.374  
5.380  
5.748

Current Data Parameters  
NAME YY-5-159  
EXPNO 1  
PROCNO 1  
F2 - Acquisition Parameters  
Date\_ 20130611  
Time\_ 21.21  
INSTRUM spect  
PROBHD 5 mm PABBO BB/  
PULPROG zg30  
TD 65336  
SOLVENT CDCl3  
NS 8  
DS 0  
SWH 8012.820 Hz  
FIDRES 0.122266 Hz  
AQ 4.0894465 sec  
RG 11.3  
DW 62.400 usec  
DE 6.50 usec  
TE 298.0 K  
D1 2.0000000 sec  
TD0 1  
==== CHANNEL f1 =====  
SFO1 400.1324710 MHz  
NUC1 1H  
P1 14.50 usec  
PL1 10.00000000 W  
F2 - Processing parameters  
SI 65336  
SF 400.1300103 MHz  
WDW EM  
SSB 0  
LB 0.30 Hz  
GB 0  
PC 1.00

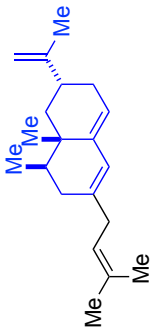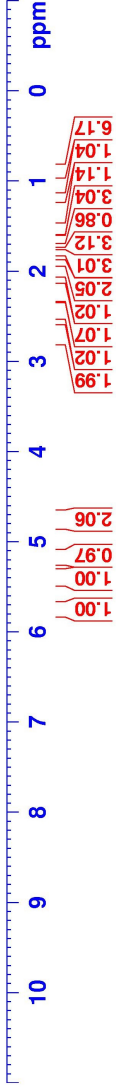



Current Data Parameters  
NAME YY-5-159  
EXPNO 2  
PROCNO 1

F2 - Acquisition Parameters  
Date\_ 20130611  
Time\_ 21.24  
INSTRUM spect  
PROBHD 5 mm PABBO BB/  
PULPROG zgpg30  
TD 65336  
SOLVENT CDCl3  
NS 32  
DS 0  
SWH 24038.461 Hz  
FIDRES 0.366798 Hz  
AQ 1.3631488 sec  
RG 203  
DW 20.800 usec  
DE 6.50 usec  
TE 298.0 K  
D1 1.00000000 sec  
D11 0.03000000 sec  
TD0 1

==== CHANNEL f1 =====  
SFO1 100.6228293 MHz  
NUC1 13C  
P1 10.00 usec  
PLW1 44.00000000 W

==== CHANNEL f2 =====  
SFO2 400.1316005 MHz  
NUC2 1H  
PCPD2 waltz16  
PCPD2 90.00 usec  
PLW2 10.00000000 W  
PLW12 0.25957000 W  
PLW13 0.21025001 W

F2 - Processing parameters  
SI 32768  
SF 100.6127578 MHz  
WDW EM  
SSB 0  
LB 1.00 Hz  
GB 0  
PC 1.40

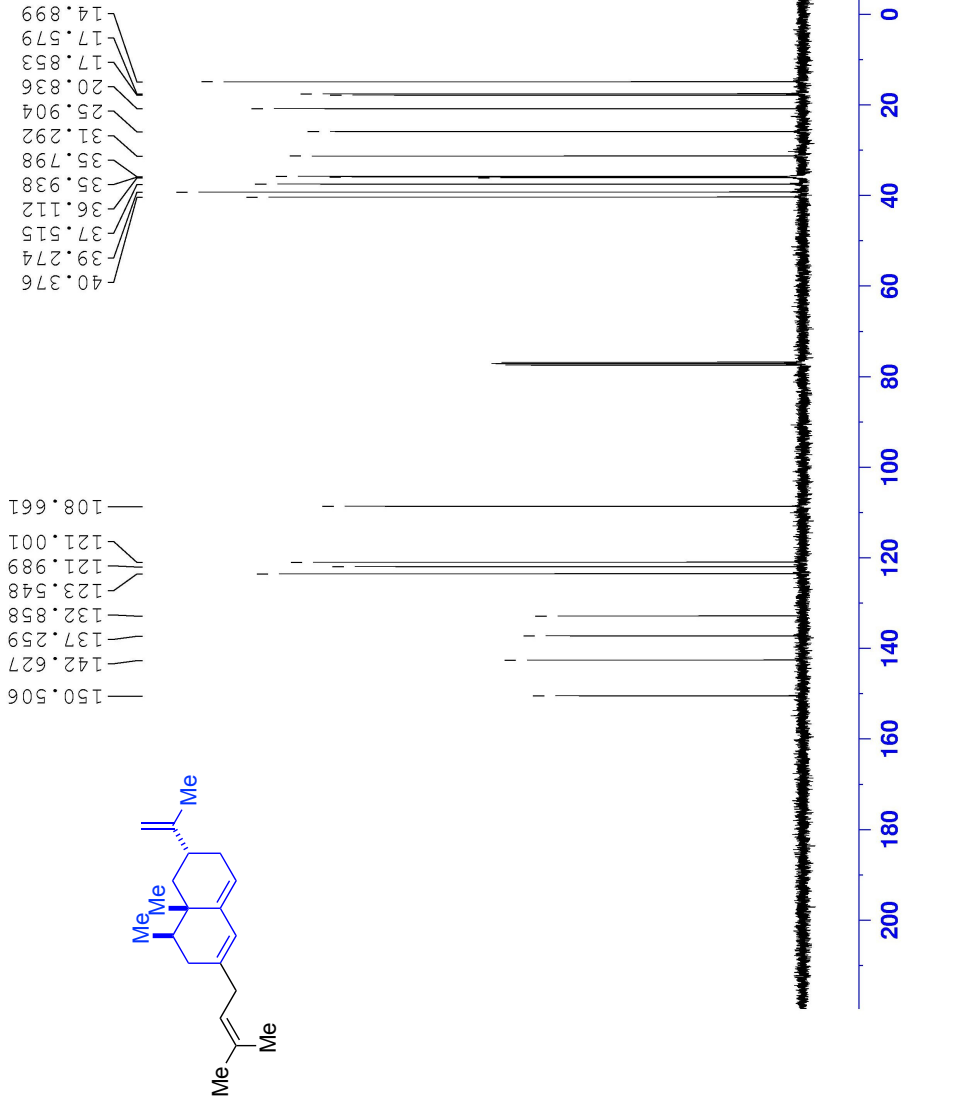

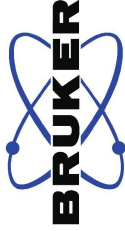

0.711  
0.866  
0.871  
0.883  
0.887  
0.923  
0.933  
0.939  
1.018  
1.023  
1.040  
1.065  
1.074  
1.084  
1.098  
1.115  
1.127  
1.143  
1.157  
1.171  
1.187  
1.195  
1.530  
1.539  
1.546  
1.563  
1.584  
1.607  
1.619  
1.634  
1.726  
1.728  
1.796  
1.818  
1.830  
2.134  
2.689  
2.707  
5.164  
5.168  
5.171  
5.324  
5.331  
5.709

Current Data Parameters  
NAME YY-5-153  
EXPNO 1  
PROCNO 1

F2 - Acquisition Parameters  
Date\_ 20130610  
Time 15.02  
INSTRUM spect  
PROBHD 5 mm PABBO BB/  
PULPROG zg30  
TD 65536  
SOLVENT CDCl3  
NS 8  
DS 0  
SWH 8012.820 Hz  
FIDRES 0.122266 Hz  
AQ 4.0894465 sec  
RG 20.2  
DW 62.400 usec  
DE 6.50 usec  
TE 298.0 K  
D1 2.0000000 sec  
TD0 1

==== CHANNEL f1 =====  
SFO1 400.1324710 MHz  
NUC1 1H  
P1 14.50 usec  
PLW1 10.00000000 W  
F2 - Processing parameters  
SI 65536  
SF 400.1300102 MHz  
WDW EM  
SSB 0  
LB 0.30 Hz  
GB 0  
PC 1.00

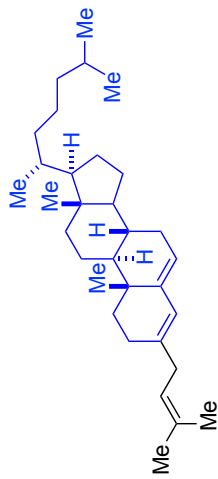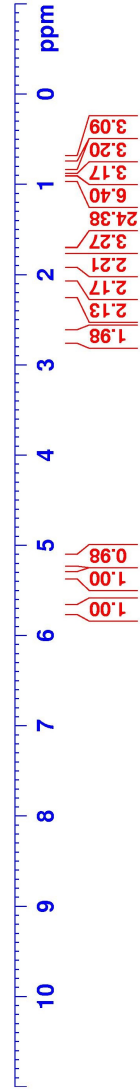

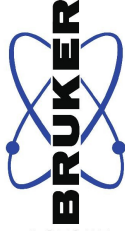

57.151  
56.342  
48.566  
42.621  
40.011  
39.692  
36.370  
36.083  
35.978  
35.096  
34.433  
32.018  
31.968  
28.423  
28.178  
26.543  
25.931  
24.357  
24.014  
22.981  
22.730  
21.294

142.083  
136.475  
132.787  
123.861  
122.098  
121.503

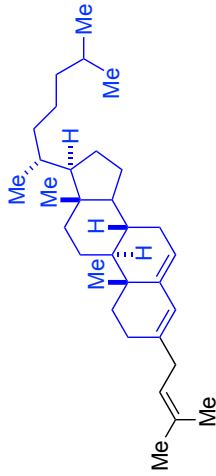

Current Data Parameters  
NAME YY-5-153  
EXPNO 3  
PROCNO 1

F2 - Acquisition Parameters  
Date\_ 20130610  
Time 15.13  
INSTRUM spect  
PROBHD 5 mm PABBO BB/  
PULPROG zgpg30  
TD 65536  
SOLVENT CDCl3  
NS 32  
DS 0  
SWH 24038.461 Hz  
FIDRES 0.366798 Hz  
AQ 1.3631488 sec  
RG 203  
DW 20.800 usec  
DE 6.50 usec  
TE 298.0 K  
D1 1.00000000 sec  
D11 0.03000000 sec  
TD0 1

==== CHANNEL f1 =====  
SFO1 100.6228293 MHz  
NUC1 13C  
P1 10.00 usec  
PLW1 44.00000000 W

==== CHANNEL f2 =====  
SFO2 400.1316005 MHz  
NUC2 1H  
CPDPRG12 waltz16  
PCPD2 90.00 usec  
PLW2 10.00000000 W  
PLW12 0.25957000 W  
PLW13 0.21025001 W

F2 - Processing parameters  
SI 32768  
SF 100.6127548 MHz  
WDW EM  
SSB 0  
LB 1.00 Hz  
GB 0  
PC 1.40



Current Data Parameters  
NAME YY-5-97  
EXPNO 1  
PROCNO 1

F2 - Acquisition Parameters  
Date\_ 20130510  
Time 19.45  
INSTRUM spect  
PROBHD 5 mm PABBO BB/  
PULPROG zg30  
TD 65536  
SOLVENT CDCl3  
NS 8  
DS 0  
SWH 8012.820 Hz  
FIDRES 0.122266 Hz  
AQ 4.0894465 sec  
RG 32  
DW 62.400 usec  
DE 6.50 usec  
TE 296.9 K  
D1 2.0000000 sec  
TD0 1

==== CHANNEL f1 =====  
SFO1 400.1324710 MHz  
NUC1 1H  
P1 13.12 usec  
PL1 15.00000000 W  
F2 - Processing parameters  
SI 65536  
SF 400.1300094 MHz  
WDW EM  
SSB 0  
LB 0.30 Hz  
GB 0  
PC 1.00

8.184  
8.165  
8.002  
7.547  
7.544  
7.529  
7.526  
7.524  
7.509  
7.506  
7.455  
7.434  
7.391  
7.389  
7.313  
7.311  
7.293  
7.276  
7.274  
5.576  
5.573  
5.558  
5.557  
5.257  
5.254  
4.417  
4.399  
4.380  
4.362  
3.659  
3.641  
2.266  
2.250  
2.234  
2.213  
2.195  
1.891  
1.819  
1.798  
1.796  
1.755  
1.721  
1.494  
1.476  
1.458

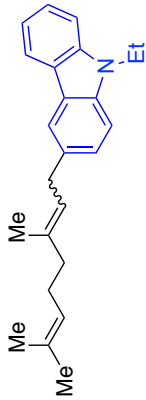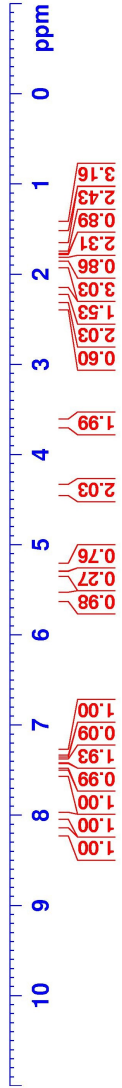



Current Data Parameters  
NAME YY-5-97  
EXPNO 2  
PROCNO 1

F2 - Acquisition Parameters

Date\_ 20130510  
Time 19.48  
INSTRUM spect  
PROBHD 5 mm PABBO BB/  
PULPROG zgpg30  
TD 65536  
SOLVENT CDCl3  
NS 32  
DS 0  
SWH 24038.461 Hz  
FIDRES 0.366798 Hz  
AQ 1.3631488 sec  
RG 203  
DW 20.800 usec  
DE 6.50 usec  
TE 297.3 K  
D1 2.00000000 sec  
D11 0.03000000 sec  
TD0 1

=====  
CHANNEL f1 =====  
SFO1 100.6228293 MHz  
NUC1 13C  
P1 10.00 usec  
PLW1 49.00000000 W

=====  
CHANNEL f2 =====  
SFO2 400.1316005 MHz  
NUC2 1H  
CPDPRG12 waltz16  
PCPD2 90.00 usec  
PLW2 15.00000000 W  
PLW12 0.31876999 W  
PLW13 0.25819999 W

F2 - Processing parameters  
SI 32768  
SF 100.6127673 MHz  
WDW EM  
SSB 0  
LB 0  
GB 0  
PC 1.40

13.906  
16.349  
17.855  
23.648  
25.878  
26.849  
32.209  
34.272  
34.361  
37.584  
39.928  
108.346  
108.446  
108.592  
118.831  
119.863  
120.474  
122.968  
123.180  
123.204  
124.334  
124.458  
124.488  
125.169  
125.514  
126.406  
126.426  
131.510  
131.802  
132.321  
132.350  
135.636  
135.661  
138.592  
140.286

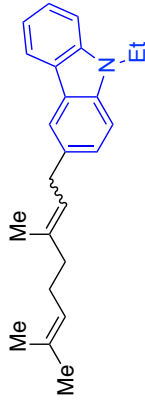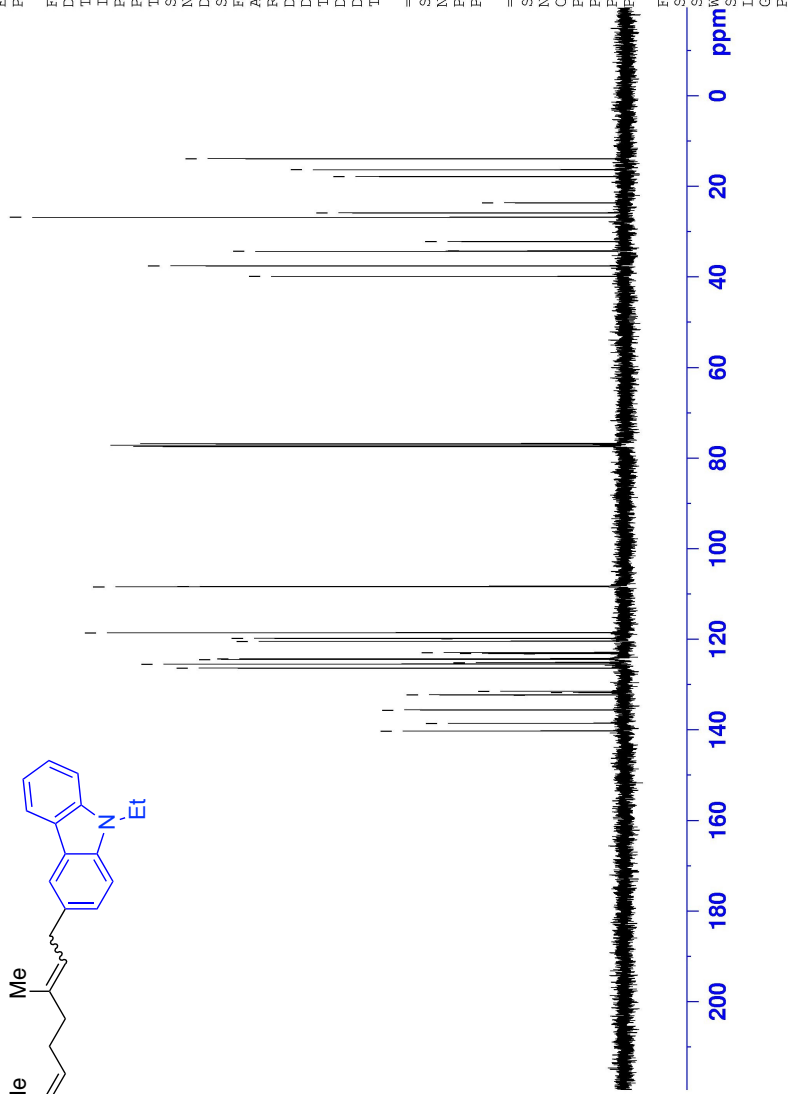

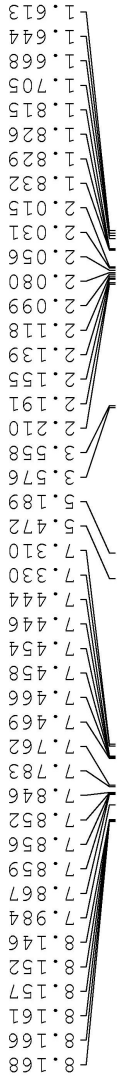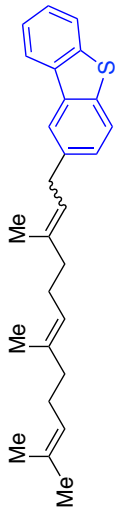

Current Data Parameters  
NAME YY-5-105  
EXPNO 1  
PROCNO 1

F2 - Acquisition Parameters  
Date\_ 20130511  
Time 10.49  
INSTRUM spect  
PROBHD 5 mm PABBO BB/  
PULPROG zg30  
TD 65536  
SOLVENT CDCl3  
NS 8  
DS 0  
SWH 8012.820 Hz  
FIDRES 0.122266 Hz  
AQ 4.0894465 sec  
RG 32  
DW 62.400 usec  
DE 6.50 usec  
TE 297.4 K  
D1 2.0000000 sec  
TD0 1

==== CHANNEL f1 =====  
SFO1 400.1324710 MHz  
NUC1 1H  
P1 13.12 usec  
PLW1 15.00000000 W

F2 - Processing parameters  
SI 65536  
SF 400.1300088 MHz  
WDW EM  
SSB 0  
LB 0.30 Hz  
GB 0  
PC 1.00



Current Data Parameters  
NAME YY-5-105  
EXPNO 2  
PROCNO 1

F2 - Acquisition Parameters  
Date\_ 20130511  
Time 10.52  
INSTRUM spect  
PROBHD 5 mm PABBO BB/  
PULPROG zgpg30  
TD 65536  
SOLVENT CDCl3  
NS 32  
DS 0  
SWH 24038.461 Hz  
FIDRES 0.366798 Hz  
AQ 1.3631488 sec  
RG 203  
DW 20.800 usec  
DE 6.50 usec  
TE 297.6 K  
D1 2.00000000 sec  
D11 0.03000000 sec  
TD0 1

==== CHANNEL f1 =====  
SFO1 100.6228293 MHz  
NUC1 13C  
P1 10.00 usec  
PLW1 49.00000000 W

==== CHANNEL f2 =====  
SFO2 400.1316005 MHz  
NUC2 1H  
CPDPRG12 waltz16  
PCPD2 90.00 usec  
PLW2 15.00000000 W  
PLW12 0.31876999 W  
PLW13 0.25819999 W

F2 - Processing parameters  
SI 32768  
SF 100.6127600 MHz  
WDW EM  
SSB 0  
LB 1.00 Hz  
GB 0  
PC 1.40

139.967  
138.385  
138.355  
136.917  
136.664  
136.589  
135.876  
135.643  
135.577  
135.296  
135.227  
131.389  
127.702  
126.627  
124.493  
124.295  
124.178  
124.091  
124.035  
123.330  
122.943  
122.679  
121.637  
121.170

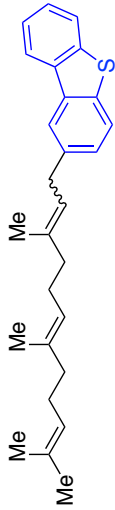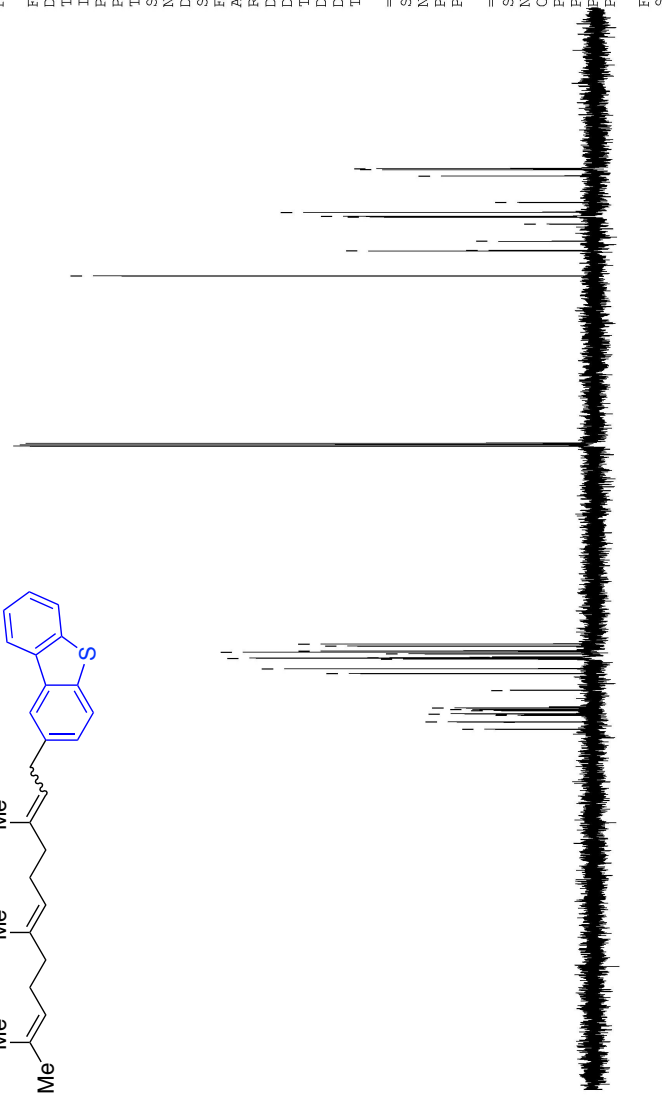





1.183  
1.191  
1.197  
1.222  
1.229  
1.255  
1.270  
1.275  
1.279  
1.286  
1.292  
1.299  
1.323  
1.334  
1.356  
1.362  
1.459  
1.694  
1.697  
1.713  
1.757  
1.777  
1.807  
1.911  
3.173  
3.195  
3.216  
3.303  
3.321  
4.536  
4.558  
4.580  
5.322  
5.325  
5.338  
5.340  
5.343  
5.356  
5.358  
6.716  
6.736  
6.927  
6.947  
7.032

Current Data Parameters  
NAME YY-5-119  
EXPNO 1  
PROCNO 1

F2 - Acquisition Parameters  
Date\_ 20130520  
Time 10.36  
INSTRUM spect  
PROBHD 5 mm PABBO BB/  
PULPROG zg30  
TD 65536  
SOLVENT CDCl3  
NS 8  
DS 0  
SWH 8012.820 Hz  
FIDRES 0.122266 Hz  
AQ 4.0894465 sec  
RG 32  
DW 62.400 usec  
DE 6.50 usec  
TE 298.0 K  
D1 2.00000000 sec  
TD0 1

==== CHANNEL f1 =====  
SFO1 400.1324710 MHz  
NUC1 1H  
P1 13.12 usec  
PLW1 15.00000000 W  
F2 - Processing parameters  
SI 65536  
SF 400.1300094 MHz  
WDW EM  
SSB 0  
LB 0.30 Hz  
GB 0  
PC 1.00

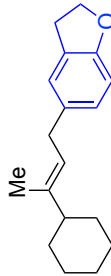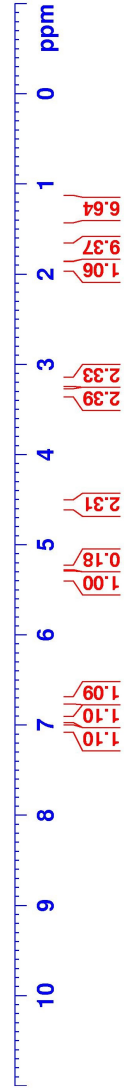

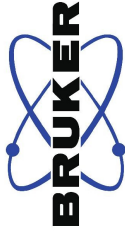

Current Data Parameters  
NAME YY-5-119  
EXPNO 2  
PROCNO 1

F2 - Acquisition Parameters

Date\_ 20130520  
Time 10.38  
INSTRUM spect  
PROBHD 5 mm PABBO BB/  
PULPROG zgpg30  
TD 65536  
SOLVENT CDCl3  
NS 32  
DS 4  
SWH 24038.461 Hz  
FIDRES 0.366798 Hz  
AQ 1.3631488 sec  
RG 203  
DW 20.800 usec  
DE 6.50 usec  
TE 298.0 K  
D1 2.00000000 sec  
D11 0.03000000 sec  
TD0 1

=====  
CHANNEL f1 =====  
SFO1 100.6228293 MHz  
NUC1 13C  
P1 10.00 usec  
PLW1 49.00000000 W

=====  
CHANNEL f2 =====  
SFO2 400.1316005 MHz  
NUC2 1H  
CPDPRG12 waltz16  
PCPD2 90.00 usec  
PLW2 15.00000000 W  
PLW12 0.31876999 W  
PLW13 0.25819999 W

F2 - Processing parameters  
SI 32768  
SF 100.6127621 MHz  
WDW EM  
SSB 0  
LB 0  
GB 0  
PC 1.40

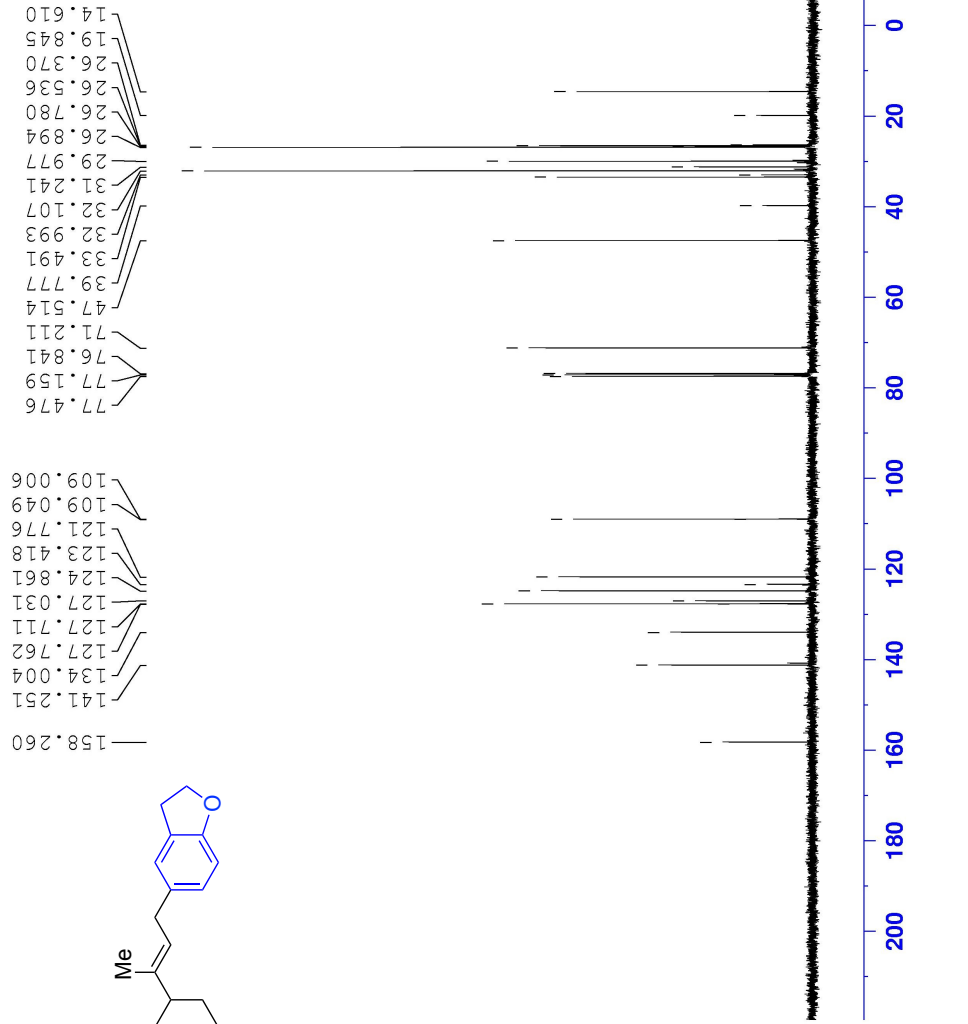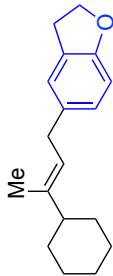



Current Data Parameters  
NAME YY-5-135  
EXPNO 1  
PROCNO 1

F2 - Acquisition Parameters  
Date\_ 20130528  
Time\_ 21.45  
INSTRUM spect  
PROBHD 5 mm PABBO BB/  
PULPROG zg30  
TD 65336  
SOLVENT CDCl3  
NS 8  
DS 0  
SWH 8012.820 Hz  
FIDRES 0.122266 Hz  
AQ 4.0894465 sec  
RG 11.3  
DW 62.400 usec  
DE 6.50 usec  
TE 298.0 K  
D1 2.0000000 sec  
TD0 1

==== CHANNEL f1 =====  
SFO1 400.1324710 MHz  
NUC1 1H  
P1 13.12 usec  
PL1 15.0000000 W

F2 - Processing parameters  
SI 65336  
SF 400.1300088 MHz  
WDW EM  
SSB 0  
LB 0.30 Hz  
GB 0  
PC 1.00

7.243  
7.223  
7.138  
7.118  
5.355  
5.352  
5.337  
5.334  
5.319  
5.317  
3.477  
3.422  
3.305  
3.236  
1.653  
1.652  
1.166  
1.147  
1.115  
1.111  
1.105  
1.093  
1.087  
1.076  
1.011

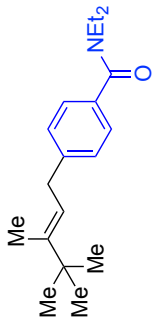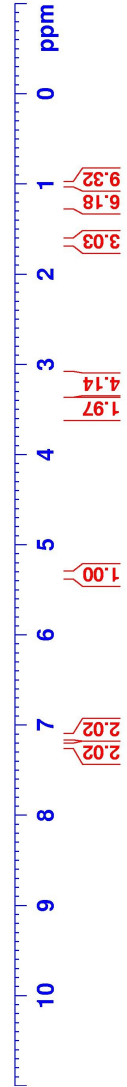

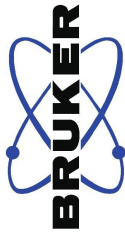

Current Data Parameters  
NAME YY-5-135  
EXPNO 2  
PROCNO 1

F2 - Acquisition Parameters  
Date\_ 20130528  
Time\_ 21.47  
INSTRUM spect  
PROBHD 5 mm PABBO BB/  
PULPROG zgpg30  
TD 65536  
SOLVENT CDC13  
NS 32  
DS 0  
SWH 24038.461 Hz  
FIDRES 0.366798 Hz  
AQ 1.3631488 sec  
RG 203  
DW 20.800 usec  
DE 6.50 usec  
TE 298.1 K  
D1 1.0000000 sec  
D11 0.0300000 sec  
TD0 1

==== CHANNEL f1 =====  
SFO1 100.6228293 MHz  
NUC1 13C  
P1 10.00 usec  
PLW1 49.00000000 W  
==== CHANNEL f2 =====  
SFO2 400.1316005 MHz  
NUC2 1H  
PCPD2 waitz16  
PLW2 15.00000000 W  
PLW12 0.31876999 W  
PLW13 0.25819999 W

F2 - Processing parameters  
SI 32768  
SF 100.6127757 MHz  
WDW EM  
SSB 0 1.00 Hz  
LB 0  
GB 0  
PC 1.40

43.248  
39.132  
36.102  
34.052  
28.991  
14.129  
12.861

171.318  
144.678  
143.045  
134.554  
128.155  
126.322  
119.031

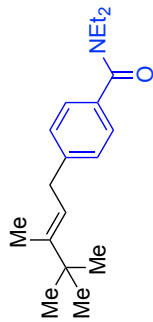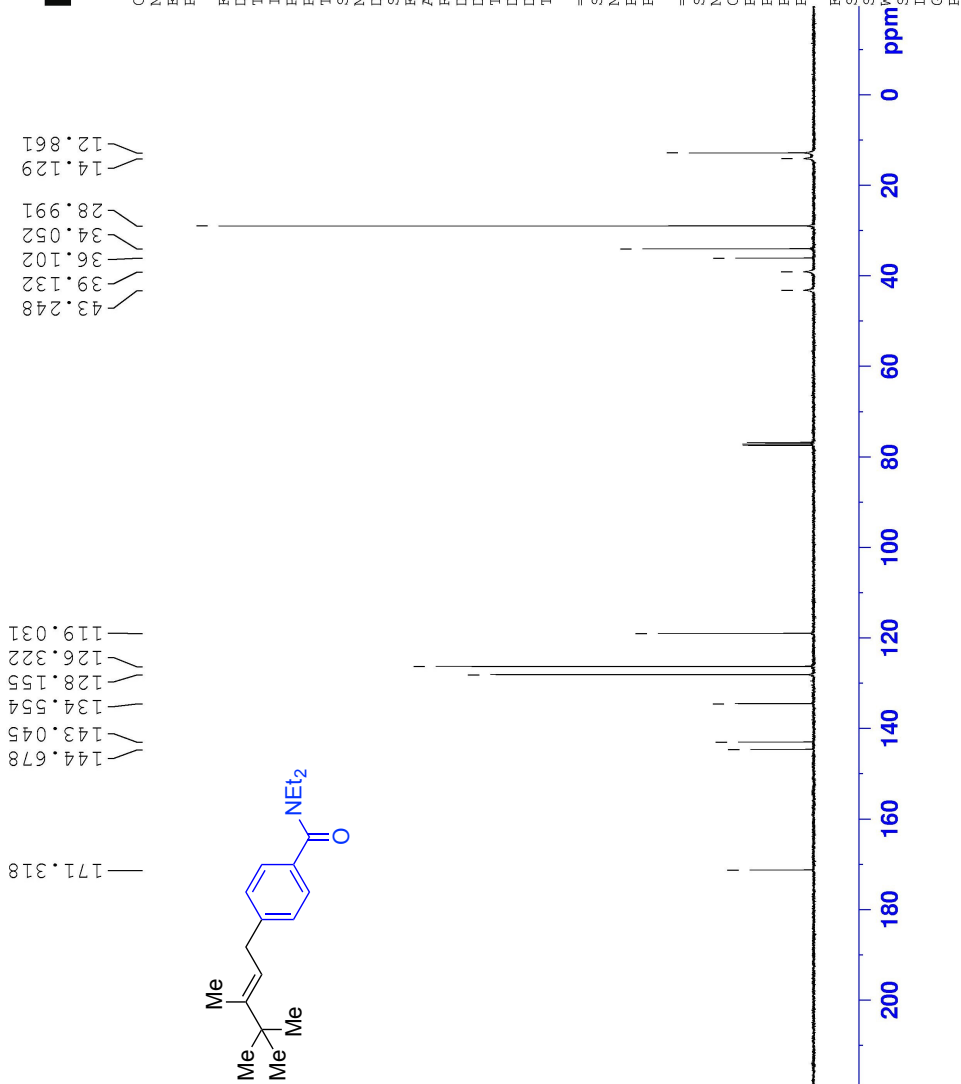



Current Data Parameters  
NAME YY-5-95  
EXPNO 1  
PROCNO 1

F2 - Acquisition Parameters  
Date\_ 20130513  
Time\_ 22.33  
INSTRUM spect  
PROBHD 5 mm PABBO BB/  
PULPROG zg30  
TD 65336  
SOLVENT CDCl3  
NS 8  
DS 0  
SWH 8012.820 Hz  
FIDRES 0.122266 Hz  
AQ 4.0894465 sec  
RG 32  
DW 62.400 usec  
DE 6.50 usec  
TE 298.0 K  
D1 2.0000000 sec  
TD0 1

==== CHANNEL f1 =====  
SFO1 400.1324710 MHz  
NUC1 1H  
P1 14.50 usec  
PL1 10.0000000 W

F2 - Processing parameters  
SI 65336  
SF 400.1300098 MHz  
WDW EM  
SSB 0  
LB 0.30 Hz  
GB 0  
PC 1.00

7.392  
7.380  
7.372  
7.330  
7.325  
7.312  
7.309  
7.296  
7.293  
7.260  
7.250  
7.247  
7.244  
7.234  
7.229  
7.224  
7.211  
5.799  
5.795  
5.780  
5.777  
5.761  
5.758  
5.463  
5.460  
5.456  
5.452  
5.449  
4.057  
4.050  
3.708  
3.693  
3.679  
2.904  
2.886  
2.137  
2.064  
2.043  
2.042  
1.287

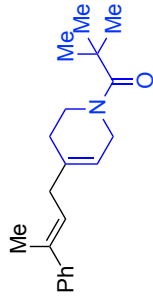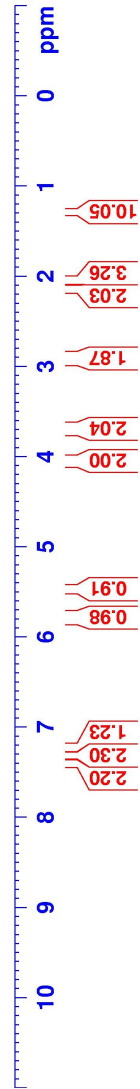



Current Data Parameters  
NAME YY-5-95  
EXPNO 2  
PROCNO 1

F2 - Acquisition Parameters  
Date\_ 20130513  
Time\_ 22.37  
INSTRUM spect  
PROBHD 5 mm PABBO BB/  
TD 209330  
PULPROG zgpg30  
SOLVENT CDCl3  
NS 35  
DS 0  
SWH 24038.461 Hz  
FIDRES 0.366798 Hz  
AQ 1.3631488 sec  
RG 203  
DW 20.800 usec  
DE 6.50 usec  
TE 298.0 K  
D1 2.0000000 sec  
D11 0.0300000 sec  
TD0 1

==== CHANNEL f1 =====  
SFO1 100.6228293 MHz  
NUC1 13C  
P1 10.00 usec  
PLW1 44.00000000 W

==== CHANNEL f2 =====  
SFO2 400.1316005 MHz  
NUC2 1H  
PCPD2 waltz16  
PCPD2 90.00 usec  
PLW2 10.00000000 W  
PLW12 0.25957000 W  
PLW13 0.21025001 W

F2 - Processing parameters  
SI 32768  
SF 100.6127651 MHz  
WDW EM  
SSB 0  
LB 1.00 Hz  
GB 0  
PC 1.40

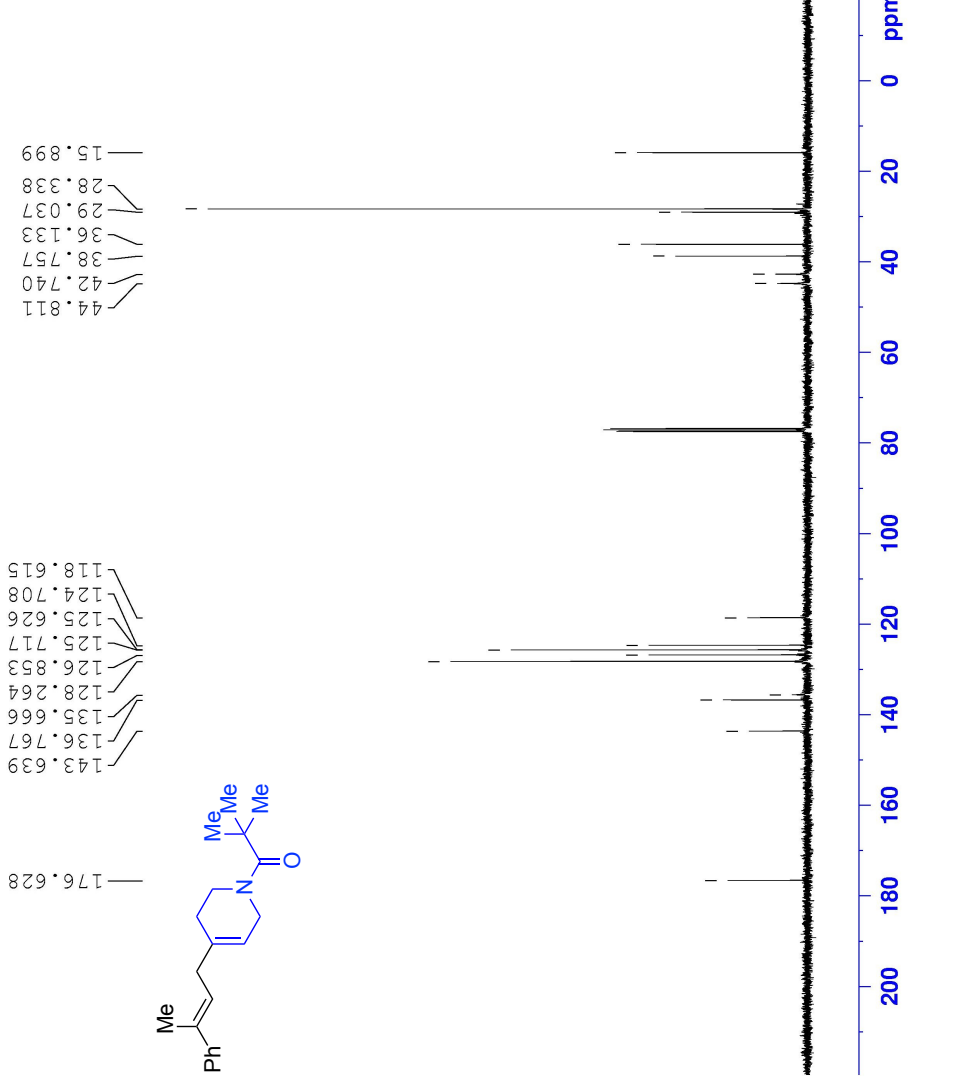

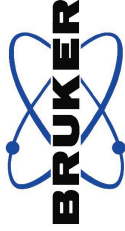

Current Data Parameters  
NAME YY-5-130\_13C  
EXPNO 1  
PROCNO 1

F2 - Acquisition Parameters  
Date\_ 20130620  
Time 20.07  
INSTRUM spect  
PROBHD 5 mm PABBO/BB/  
PULPROG zg30  
TD 65536  
SOLVENT CDCl3  
NS 8  
DS 0  
SWH 8012.820 Hz  
FIDRES 0.122266 Hz  
AQ 4.0894465 sec  
RG 57  
DW 62.400 usec  
DE 6.50 usec  
TE 298.0 K  
D1 2.0000000 sec  
TD0 1

==== CHANNEL f1 =====  
SFO1 400.1324710 MHz  
NUC1 1H  
P1 14.50 usec  
PL1 10.00000000 W  
F2 - Processing parameters  
SI 65536  
SF 400.1300100 MHz  
WDW EM  
SSB 0  
LB 0.30 Hz  
GB 0  
PC 1.00

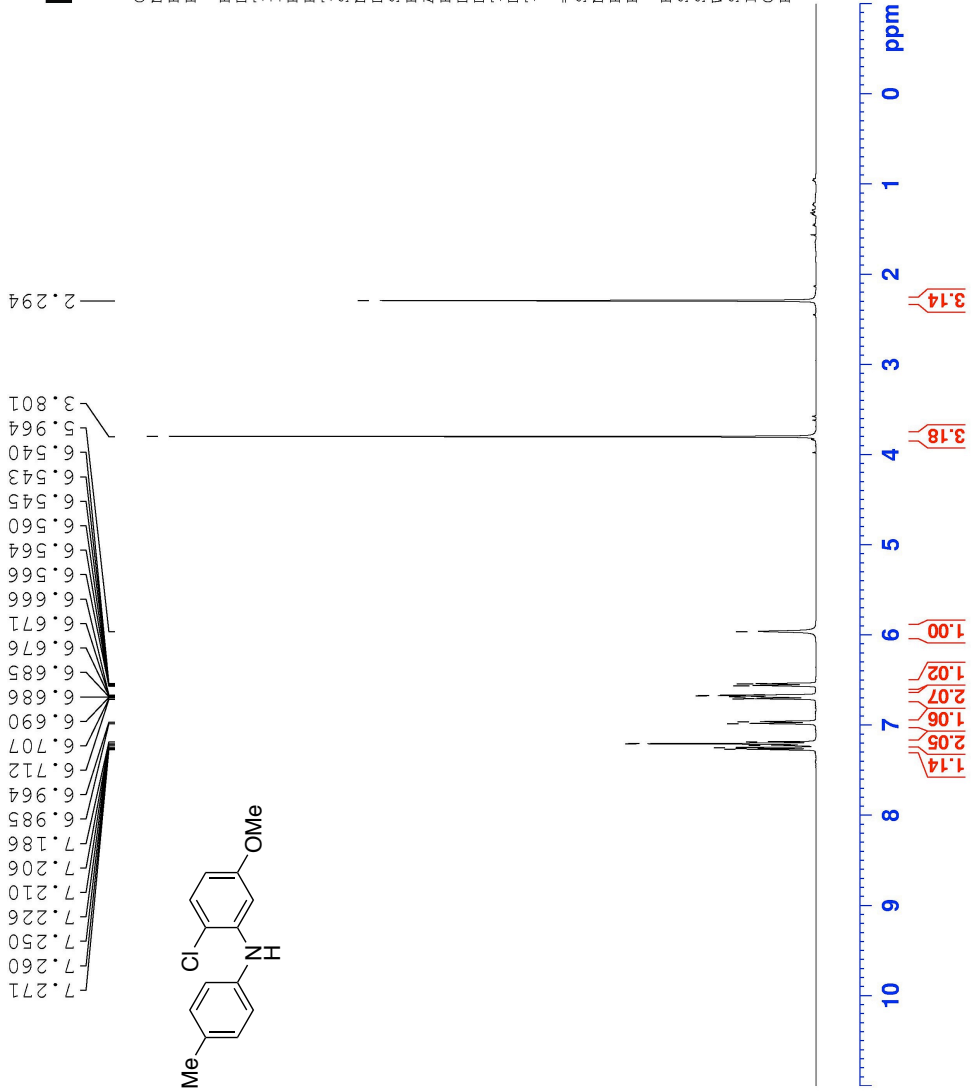

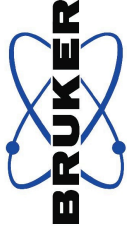

Current Data Parameters  
NAME YY-S-130\_13C  
EXPNO 2  
PROCNO 1

F2 - Acquisition Parameters  
Date\_ 20130620  
Time 20.09  
INSTRUM spect  
PROBHD 5 mm PABBO BB/  
PULPROG zgpg30  
TD 65536  
SOLVENT CDCl3  
NS 32  
DS 0  
SWH 24038.461 Hz  
FIDRES 0.366798 Hz  
AQ 1.3631488 sec  
RG 203  
DW 20.800 usec  
DE 6.50 usec  
TE 298.1 K  
D1 1.00000000 sec  
D11 0.03000000 sec  
TD0 1

==== CHANNEL f1 =====  
SFO1 100.6228293 MHz  
NUC1 13C  
P1 10.00 usec  
PLW1 44.00000000 W

==== CHANNEL f2 =====  
SFO2 400.1316005 MHz  
NUC2 1H  
CPDPRG12 waltz16  
PCPD2 90.00 usec  
PLW2 10.00000000 W  
PLW12 0.25957000 W  
PLW13 0.21025001 W

F2 - Processing parameters  
SI 32768  
SF 100.6127596 MHz  
WDW EM  
SSB 0  
LB 1.00 Hz  
GB 0  
PC 1.40

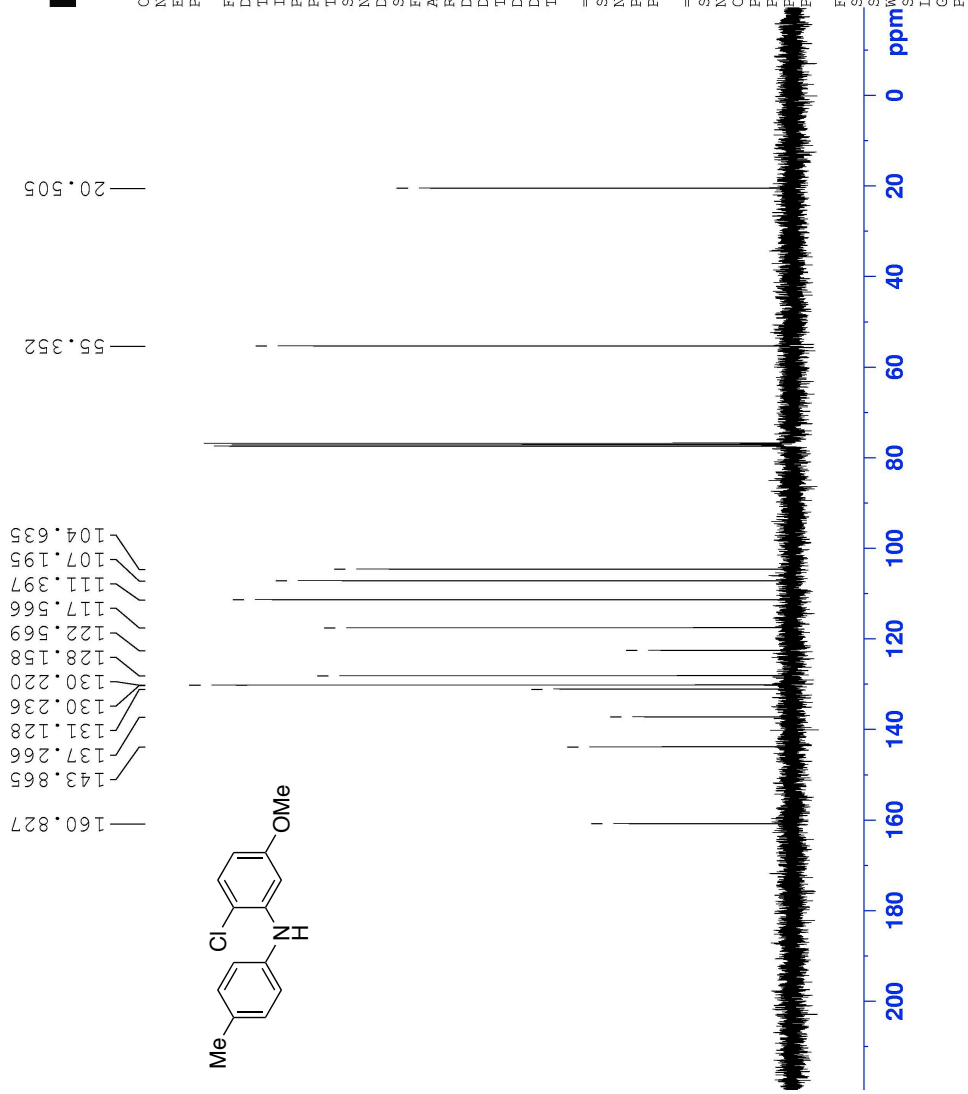

Supplement: NIHMS566068-supplement-Supporting_Information.pdf [file NIHMS566068-supplement-Supporting_Information.pdf]
